# Supplementary material
Source: Copernicus journal article supplement (doi:10.5194/bg-23-2761-2026)
Supplement: Supplementary file 1 [file bg-23-2761-2026-supplement.pdf]

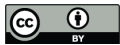

*Supplement of*

## **Spatial heterogeneity of soil organic matter and microbial community composition across ice-wedge polygons and soil layers in Arctic lowland tundra**

**Victoria Martin et al.**

*Correspondence to:* Victoria Martin ([victoria.sophie.martin@univie.ac.at](mailto:victoria.sophie.martin@univie.ac.at))

The copyright of individual parts of the supplement might differ from the article licence.

# Supplementary

## Table of Contents

|                                                                                                                     |           |
|---------------------------------------------------------------------------------------------------------------------|-----------|
| <b>S1. Study area and soil sampling</b> .....                                                                       | <b>3</b>  |
| <i>Supplementary Tables</i>                                                                                         |           |
| <b>[Table S1]</b>                                                                                                   |           |
| (a) Polygon types, coordinates, and vegetation composition in sampled soil pits                                     |           |
| (b) Active layer depths and in-situ soil temperatures                                                               |           |
| (c) Summary of sample layout .....                                                                                  | 4-6       |
| <i>Supplementary Figures</i>                                                                                        |           |
| <b>[Fig. S1]</b> Examples for investigated (a) polygon types; (b) soil layers .....                                 | 7         |
| <b>S2. Physicochemical soil parameters and stoichiometry</b> .....                                                  | <b>9</b>  |
| <i>Supplementary Tables</i>                                                                                         |           |
| <b>[Table S2]</b> Physicochemical soil parameters and stoichiometry across (a) polygon types; (b) soil layers ..... | 10-12     |
| <b>S3. Chemical composition of soil organic matter</b> .....                                                        | <b>13</b> |
| <i>Supplementary Tables</i>                                                                                         |           |
| <b>[Table S3]</b> Correlations between SOM compound group abundances and soil C content .....                       | 15        |
| <i>Supplementary Figures</i>                                                                                        |           |
| <b>[Fig. S2]</b> Number of shared and unique pyrolysis products across (a) polygon types; (b) soil layers .....     | 16        |
| <b>[Fig. S3]</b> Abundances of SOM compound groups across (a) polygon types; (b) soil layers .....                  | 17        |
| <b>[Fig. S4]</b> Relative abundances of SOM compound groups across (a) polygon types; (b) soil layers .....         | 18        |
| <b>S4. Soil microbial communities</b> .....                                                                         | <b>19</b> |
| <i>Supplementary Tables</i>                                                                                         |           |
| <b>[Table S4]</b> Cycling conditions used for digital droplet PCR (ddPCR) .....                                     | 21        |

|                                                                                                                                                                            |       |
|----------------------------------------------------------------------------------------------------------------------------------------------------------------------------|-------|
| S4.1. Bacterial and archaeal communities.....                                                                                                                              | 23    |
| <i>Supplementary Tables</i>                                                                                                                                                |       |
| <b>[Table S5]</b> Interactive effects of polygon type and soil layer category on bacterial and archaeal community composition (corresponding to Fig. 3 in main text) ..... | 23    |
| <b>[Table S6]</b> ddPCR-informed abundance estimates of selected bacterial and archaeal phyla                                                                              | 24-29 |
| <i>Supplementary Figures</i>                                                                                                                                               |       |
| <b>[Fig. S5]</b> Bacterial and archaeal richness, diversity, and abundance estimates.....                                                                                  | 30    |
| <b>[Fig. S6]</b> Number of shared and unique bacterial and archaeal ASVs across (a) polygon types; (b) soil layers.....                                                    | 32    |
| <b>[Fig. S7]</b> Archaeal abundance (a) ddPCR-informed abundance; (b) relative abundance .....                                                                             | 33    |
| <b>[Fig. S8]</b> Heatmap: ddPCR-informed abundance estimates of bacterial and archaeal phyla.....                                                                          | 34    |
| S4.2. Fungal communities.....                                                                                                                                              | 35    |
| <i>Supplementary Tables</i>                                                                                                                                                |       |
| <b>[Table S7]</b> ddPCR-informed abundance estimates of fungal phyla .....                                                                                                 | 35-37 |
| <i>Supplementary Figures</i>                                                                                                                                               |       |
| <b>[Fig. S9]</b> Fungal richness, diversity, and abundance estimates.....                                                                                                  | 38    |
| <b>[Fig. S10]</b> Number of shared and unique fungal ASVs across (a) polygon types; (b) soil layers                                                                        | 40    |
| <b>[Fig. S11]</b> Heatmap: ddPCR-informed abundance estimates of fungal phyla .....                                                                                        | 41    |
| S5. Extracellular enzymatic activity potential .....                                                                                                                       | 42    |
| <i>Supplementary Tables</i>                                                                                                                                                |       |
| <b>[Table S8]</b> Correlations between enzyme activities and Soil C, N, P contents .....                                                                                   | 42    |
| <b>[Table S9]</b> Interactive effects of polygon type and soil layer category on potential extracellular enzymatic activities (corresponding to Fig. 5 in main text) ..... | 43-44 |
| <i>Supplementary Figures</i>                                                                                                                                               |       |
| <b>[Fig. S12]</b> Potential extracellular enzymatic activities per gram dry soil .....                                                                                     | 43    |
| S6. Statistics .....                                                                                                                                                       | 47    |
| S7. References .....                                                                                                                                                       | 49    |

## 1 S1. Study area and soil sampling

2 We studied two areas classified as Arctic lowland ice-wedge polygon tundra, located on the coastal  
3 plain of the Yukon, Western Canada (Figure 1). The first focus area comprised two small lagoons called  
4 Ptarmigan Bay (69°27'N, 139°05'W) and Whale Bay (69°25'N, 138°59'W). The second focus area,  
5 approximately 40 km further towards the west, called Komakuk Beach (69°35'N, 140°10'W), is a small  
6 coastal catchment positioned between two alluvial fans. Despite their close vicinity, the areas differ in  
7 their glaciation history. Throughout the Pleistocene, the areas of Ptarmigan Bay and Whale Bay were  
8 covered by ice sheets, whereas the Komakuk Beach further west stayed unglaciated (Dyke and Prest,  
9 1987; Fritz et al., 2012). The surface geology mainly comprises lacustrine, fluvial (Ptarmigan Bay and  
10 Komakuk Beach) and morainal deposits (Whale Bay) (Fritz et al., 2012; Rampton, 1982).

11 The periglacial landscape is characterized by a mosaic of ice-wedge polygon networks, mires, beaded  
12 streams, and thermokarst lakes (Rampton, 1982; Speetjens et al., 2022), underlain by continuous  
13 permafrost with a high ground ice content (Couture and Pollard, 2017; Westerveld et al., 2023). The  
14 climate is classified as Polar Tundra (Beck et al., 2018). Recorded mean annual temperatures (1972 -  
15 2000) at the climate stations Komakuk Beach and Shingle Point (68° 57'N, 137° 13'W) were - 11 °C (±  
16 2.0 °C) and - 9.9 °C (± 4.5 °C). Average summer temperatures (June-August) were 6 °C (± 1.6 °C) and  
17 8.6 °C (± 1.6 °C). Mean annual precipitation (1972 – 2000) was 161 mm and 254 mm correspondingly  
18 (Canadian Climate Normals & Averages). The vegetation period lasts approximately from June to  
19 September (Frank-Fahle et al., 2014). The vegetation map defines the area as bioclimatic subzone E/  
20 low Arctic shrub tundra (Walker et al., 2005).

21 Differences in microtopography and relief are strong determinants for the identity of the prevailing soil  
22 suborder and plant species composition. Turbic Cryosols were present in the drier centres of HCPs and  
23 FCPs (Canadian System of Soil Classification, Soil Classification Working Group, 1998). These soils  
24 harbor up to 40 cm thick organic horizons with material being of various decomposition stages, followed  
25 by a pronounced silt- and clay-rich mineral subsoil layer which commonly exhibits cryoturbations or  
26 gleyic features (Tarnocai, 2004). Dwarf-shrubs (e.g., *Betula nana*, *Salix arctica*, *Salix alaxensis*,  
27 *Empetrum nigrum*, *Vaccinium sp.*), forbs (e.g., *Rubus chamaemorus*, *Dryas sp.*) and lichens dominated  
28 the centres of HCPs. FCPs were mainly characterised by *Eriophorum vaginatum* tussocks and dwarf-  
29 shrubs. Inundated centres of LCP harbored Organic Cryosols, which show a more than 40 cm thick  
30 characteristic sequence from fibric to hemic to sapric sphagnum- or sedge- derived material with  
31 increasing depth. The dominant plant groups were graminoids (*Carex aquatilis*, *Eriophorum vaginatum*,  
32 *Eriophorum angustifolium*), brown mosses (Amblystegiaceae), and peat mosses (*Sphagnum sp.*)  
33 (Brooks and Lane, 2011; Rampton, 1982; Walker et al., 2005). Towards the drier rims, Organic Cryosols  
34 transitioned into Cryosols of the Gleysolic or Static type, indicated by higher dwarf shrub abundance.

**Table S1 (a).** Sampled soil pits, including polygon type, coordinates, and vegetation composition.

| Soil pit | Study Area    | Polygon type | N              | W               | Comments                                                                                                          |
|----------|---------------|--------------|----------------|-----------------|-------------------------------------------------------------------------------------------------------------------|
| 1        | Ptarmigan Bay | HCP          | 69° 27.862500' | 139° 4.939320'  | tussock tundra, <i>Salix sp.</i> , <i>Betula sp.</i> , <i>Sphagnum sp.</i> , mosses, lichens                      |
| 2        | Ptarmigan Bay | HCP          | 69° 27.860040' | 139° 5.103600'  | <i>Salix sp.</i> , <i>Betula sp.</i> , <i>Empetrum nigrum</i> , <i>Dryas sp.</i> , <i>Vaccinium sp.</i> , lichens |
| 3        | Ptarmigan Bay | HCP          | 69° 27.881220' | 139° 5.219760'  | <i>Salix sp.</i> , <i>Betula sp.</i> , <i>Rubus chamaemorus</i> , <i>Vaccinium sp.</i> , mosses, lichens          |
| 4        | Whale Bay     | FCP          | 69° 25.561920' | 138° 59.929800' | tussock tundra, <i>Salix sp.</i> , <i>Betula sp.</i> , graminoids                                                 |
| 5        | Whale Bay     | FCP          | 69° 25.601040' | 139° 0.145080'  | tussock tundra, <i>Salix sp.</i> , <i>Betula sp.</i> , <i>Vaccinium sp.</i> , <i>Ledum sp.</i> , mosses           |
| 6        | Whale Bay     | FCP          | 69° 25.522920' | 138° 59.908980' | tussock tundra, <i>Salix sp.</i> , <i>Vaccinium sp.</i> , <i>Ledum sp.</i> , mosses                               |
| 7        | Ptarmigan Bay | LCP          | 69° 27.913140' | 139° 5.086560'  | Sedge-dominated, <i>Eriophorum sp.</i> , <i>Sphagnum sp.</i> , brown mosses                                       |
| 8        | Ptarmigan Bay | LCP          | 69° 27.922800' | 139° 5.084160'  | Sedge-dominated, <i>Eriophorum sp.</i> , <i>Sphagnum sp.</i> , brown mosses                                       |
| 9        | Ptarmigan Bay | LCP          | 69° 27.917880' | 139° 5.030940'  | Sedge-dominated, <i>Eriophorum sp.</i> , <i>Sphagnum sp.</i> , brown mosses                                       |
| 10       | Komakuk Beach | HCP          | 69° 35.590020' | 140° 9.880020'  | <i>Betula sp.</i> , <i>Dryas sp.</i> , <i>Rubus chamaemorus</i> , mosses, lichens                                 |
| 11       | Komakuk Beach | HCP          | 69° 35.577000' | 140° 9.826980'  | <i>Betula sp.</i> , <i>Salix sp.</i> , <i>Vaccinium sp.</i> , <i>Rubus chamaemorus</i> , mosses                   |
| 12       | Komakuk Beach | HCP          | 69° 35.610000' | 140° 9.768000'  | tussock tundra, <i>Betula sp.</i> , <i>Empetrum nigrum</i> , mosses, lichens, fungi                               |
| 13       | Komakuk Beach | FCP          | 69° 35.338020' | 140° 9.847020'  | flat tundra surrounded by wetlands, <i>Carex sp.</i> , <i>Salix sp.</i>                                           |
| 14       | Komakuk Beach | FCP          | 69° 35.551980' | 140° 9.454020'  | flat tundra, <i>Carex sp.</i> , <i>Eriophorum sp.</i> , <i>Betula sp.</i> , <i>Vaccinium sp.</i> , mosses         |
| 15       | Komakuk Beach | FCP          | 69° 35.752020' | 140° 9.292980'  | flat tundra, <i>Carex sp.</i> , <i>Salix sp.</i> , mosses, <i>Eriophorum sp.</i>                                  |
| 16       | Komakuk Beach | LCP          | 69° 34.623000' | 140° 10.621980' | Sedge-dominated, <i>Carex sp.</i> , <i>Salix sp.</i> , <i>Sphagnum sp.</i> , brown mosses                         |
| 17       | Komakuk Beach | LCP          | 69° 34.852020' | 140° 11.119020' | Sedge-dominated, <i>Carex sp.</i> , <i>Salix sp.</i> , <i>Sphagnum sp.</i> , brown mosses                         |
| 18       | Komakuk Beach | LCP          | 69° 34.894980' | 140° 10.929000' | Sedge-dominated, <i>Eriophorum sp.</i> , brown mosses                                                             |

Dry areas of high-centered polygons (HCPs) were typically dominated by dwarf shrubs, forbs, and lichens, whereas centers of low-centered polygons (LCPs) were characterized by water-saturated conditions and vegetation dominated by graminoids and peat- and brown mosses..

**Table S1 (b).** Sampled soil pits, including active layer depths and in-situ soil temperatures.

| Soil pit | Study Area    | Polygon type | AL depth (cm) | In-situ Soil Temp (°C) |       |       |          |
|----------|---------------|--------------|---------------|------------------------|-------|-------|----------|
|          |               |              |               | 5 cm                   | 15 cm | 25 cm | PF Table |
| 1        | Ptarmigan Bay | HCP          | 35.0          | 7.7                    | 2.5   | 1.8   | 1.4      |
| 2        | Ptarmigan Bay | HCP          | 30.0          | 4.5                    | 2.8   | 1.7   | 1.5      |
| 3        | Ptarmigan Bay | HCP          | 31.0          | 4.3                    | 3.9   | 3.6   | 0.9      |
| 4        | Whale Bay     | FCP          | 40.0          | 4.9                    | 1.9   | 0.9   | 0.3      |
| 5        | Whale Bay     | FCP          | 40.0          | 4.4                    | 4.0   | 2.5   | 1.9      |
| 6        | Whale Bay     | FCP          | 40.0          | 7.7                    | 2.9   | 2.3   | 1.2      |
| 7        | Ptarmigan Bay | LCP          | 40.0          | 4.8                    | 4.4   | 3.8   | 2.0      |
| 8        | Ptarmigan Bay | LCP          | 30.0          | 3.8                    | 3.6   | 3.4   | 2.5      |
| 9        | Ptarmigan Bay | LCP          | 30.0          | 6.6                    | 5.6   | 4.5   | n.a.     |
| 10       | Komakuk Beach | HCP          | 30.0          | 5.1                    | 3.4   | 2.4   | 1.6      |
| 11       | Komakuk Beach | HCP          | 22.5          | 3.6                    | 2.5   | -     | 1.5      |
| 12       | Komakuk Beach | HCP          | 30.5          | 5.5                    | 4.5   | 3.6   | 2.3      |
| 13       | Komakuk Beach | FCP          | 28.0          | 7.4                    | 2.5   | 1.4   | 0.4      |
| 14       | Komakuk Beach | FCP          | 30.0          | 4.7                    | 4.3   | 3.4   | 2.6      |
| 15       | Komakuk Beach | FCP          | 22.5          | 4.6                    | 1.1   | -     | 0.1      |
| 16       | Komakuk Beach | LCP          | 45.0          | 6.6                    | 6.2   | 4.7   | 0.8      |
| 17       | Komakuk Beach | LCP          | 52.0          | 6.8                    | 5.6   | 3.6   | n.a.     |
| 18       | Komakuk Beach | LCP          | 40.0          | 5.7                    | 4.3   | 3.0   | 0.2      |

Average active layer depths ranged between  $30 \pm 2$  cm (mean  $\pm$  SE) in high-centered (HCPs),  $33 \pm 3$  cm in flat-centered (FCPs), and  $40 \pm 4$  cm in low-centered (LCPs) polygons. Average in-situ soil temperatures declined from  $5.5 \pm 0.3$  °C (mean  $\pm$  stderr) at the surface (5 cm depth), to  $3.7 \pm 0.3$  °C at 15 cm depth, to  $2.9 \pm 0.3$  °C in 25 cm depth and to  $1.3 \pm 0.2$  °C at the permafrost table.

**Table S1 (c).** Summary of sample layout.

| Ptarmigan Bay & Whale Bay<br>(n=39) |              |               |               | Komakuk Beach<br>(n=42) |               |               |               |
|-------------------------------------|--------------|---------------|---------------|-------------------------|---------------|---------------|---------------|
|                                     | LCP<br>(n=8) | FCP<br>(n=17) | HCP<br>(n=14) |                         | LCP<br>(n=12) | FCP<br>(n=15) | HCP<br>(n=15) |
| organic<br>(n=15)                   | n=4          | n=6           | n=5           | organic<br>(n=20)       | n=8           | n=6           | n=6           |
| mineral<br>(n=7)                    | n=1          | n=3           | n=3           | mineral<br>(n=7)        | n=1           | n=3           | n=3           |
| cryoturbated<br>(n=7)               | n=0          | n=4           | n=3           | cryoturbated<br>(n=6)   | n=0           | n=3           | n=3           |
| permafrost<br>(n=10)                | n=3          | n=4           | n=3           | permafrost<br>(n=9)     | n=3           | n=3           | n=3           |

A total of 81 soil samples were collected and categorized by polygon type (LCP: n = 20, FCP: n = 32, HCP: n = 29), and by soil layer (organic topsoil: n = 35, mineral subsoil: n = 14, cryoturbated material: n = 13, and upper permafrost: n = 19). Due to natural field heterogeneity and soil-pit specific differences in soil horizon development, an imbalanced sampling design emerged (organic: LCP = 12, FCP = 12, HCP = 11; mineral: LCP = 2, FCP = 6, HCP = 6; cryoturbated: LCP = 0, FCP = 7, HCP = 6; permafrost: LCP = 6, FCP = 7, HCP = 6). Abbreviations: HCPs = high-centered-, FCPs = flat-centered-, LCPs = low-centered polygons.

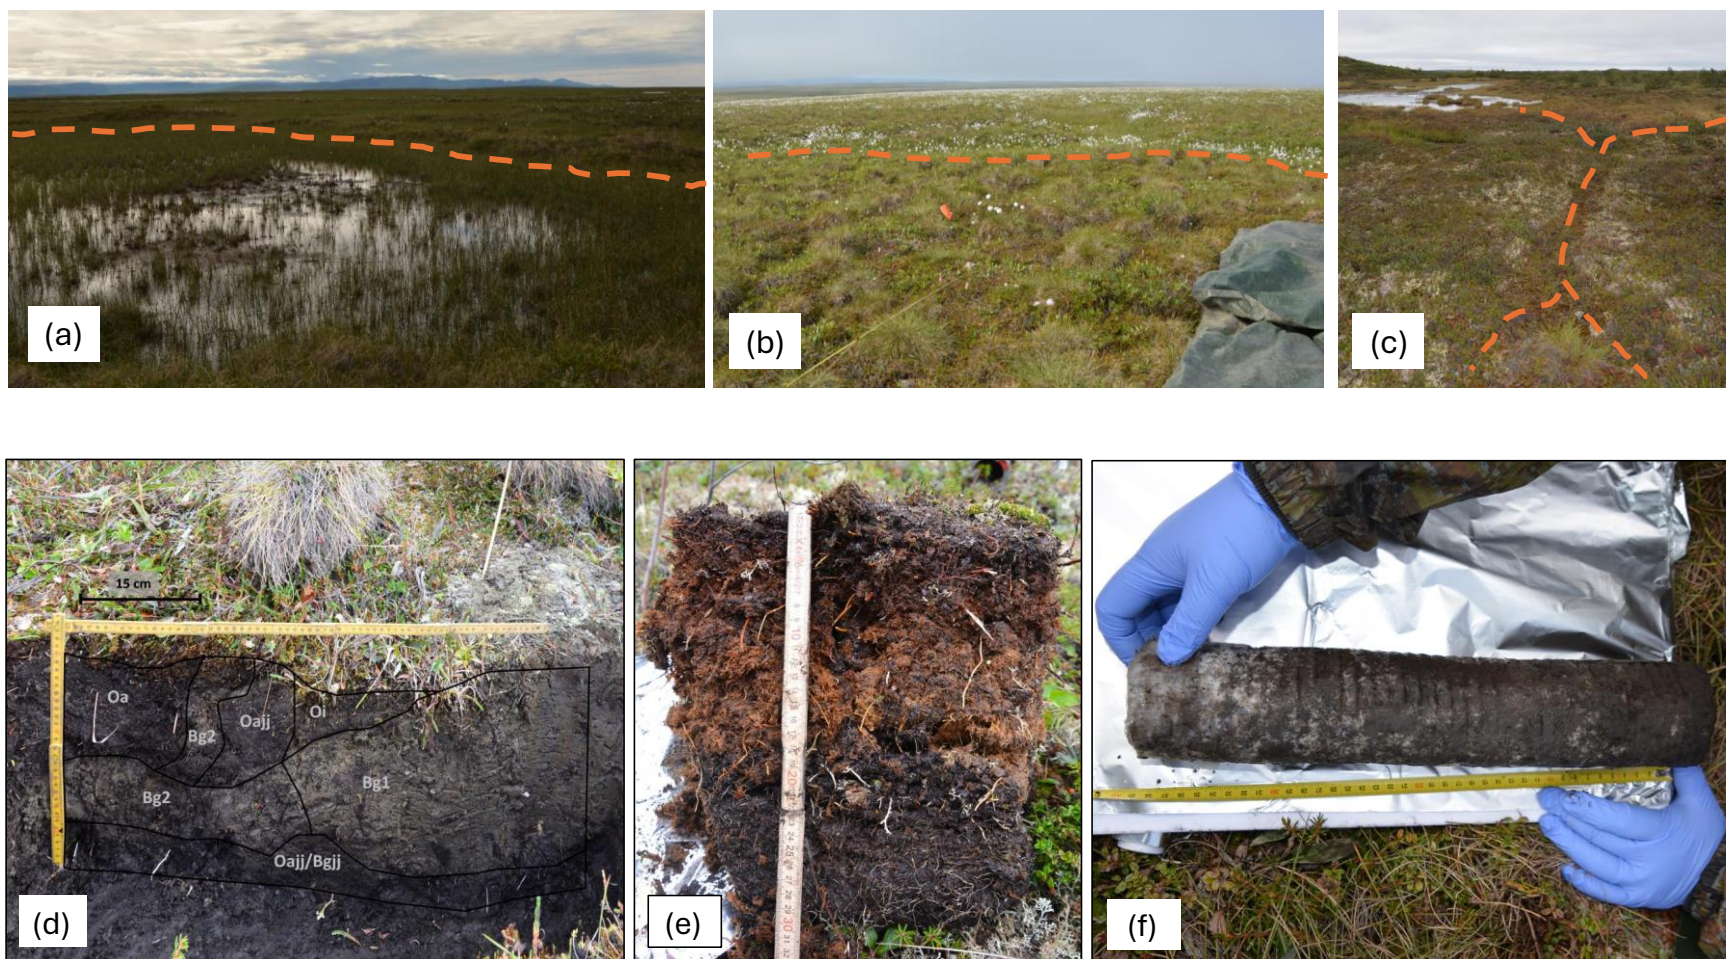

**Figure S1.** Examples for investigated ice-wedge polygon types and soil layers. Orange dotted lines roughly mark polygon borders.

**(a)** Low-centered polygon (LCP), with a dry, elevated rim around inundated center. **(b)** Flat-centered polygon (FCP) with the presence of cotton grass indicating wetter troughs around the flat-center. **(c)** High-centered polygon (HCP), with mosses indicating wetter troughs surrounding a drier, elevated center. **(d)** Active layer sampling from soil pits (applied to HCPs and FCPs); horizon boundaries (perspective corrected) were drawn on the image:(source: Wagner et al., (2023)). **(e)** Active layer sampling from LCPs (extracted peat block). **(f)** Frozen permafrost sampling (example of a core extracted using a gas powered SIPRE corer. Note that 'permafrost layer' in this manuscript refers to the upper 10 cm). Photo credits: Julia Wagner and Victoria Martin.

## 35 S2. Physicochemical soil parameters and stoichiometry

36 In the field, samples were weighed for bulk density measurements (see Wagner et al., 2023).  
37 Gravimetric soil water content ( $\text{g H}_2\text{O g}^{-1}$  DW) was determined at the facilities of the Aurora Research  
38 Institute, Inuvik, Canada, before transporting the samples to Vienna (80 °C for 48 hours). Soil pH was  
39 determined in a 1:5 (w/v) soil:MQ water slurry using a Sentron SI600. Aliquots of dry soils were ground  
40 to fine powder using a ball-mill (MM-2000, Retsch, Germany). Subsequently, 1-8 mg per sample  
41 (depending on the anticipated differences in C content between soil layer categories) were weighed  
42 into tin capsules and analyzed for total carbon ( $\text{mg C g}^{-1}$  DW) and nitrogen ( $\text{mg N g}^{-1}$  DW) contents via  
43 elemental analyzer (EA 1110, CE Instruments, Italy) coupled to a continuous-flow isotopic ratio mass  
44 spectrometer (IRMS, DeltaPlus, Finnigan MAT). The soils did not contain any carbonates, which was  
45 tested by adding 1M HCl to the samples before subjecting them to the EA-IRMS. Isotopic signatures  
46 ( $\delta^{13}\text{C}$ ,  $\delta^{15}\text{N}$ , ‰) were expressed relative to the international standard VPDB. Soil C:N, C:P, and N:P  
47 ratios were calculated on a mass basis. Pools of dissolved C and N (DOC, TDN;  $\text{mg g}^{-1}$  DW) were  
48 determined with a TOC/TN-Analyzer (Shimadzu TOC-VCP/CPNTNM-1, Shimadzu, Korneuburg,  
49 Austria) in 1M KCl extracts (soil to solution ratio 1:7.5 (w/v)). The soil total phosphorus pool (Soil P) was  
50 obtained via a modified ignition method by (Kuo, 1996), which mediates the conversion of organic bound  
51 P to inorganic P. Therefore, 200 - 500 mg dry and milled soils were combusted for 5 h at 450 °C, (muffle  
52 device Heraeus M1100/1) and then extracted for 16 hours with 10 ml 0.5M  $\text{H}_2\text{SO}_4$ . Soil total Phosphorus  
53 concentrations ( $\text{mg P g}^{-1}$  DW) were measured in the fresh extracts following the photometric malachite-  
54 green assay after (D'Angelo and Crutchfield, 2001) All above mentioned extracts have been filtered  
55 using Whatman™ quantitative ashless cellulose filter paper, grade 40.

56 The data is accessible under [10.5281/zenodo.18631833](https://zenodo.org/record/18631833).

**Table S2 (a).** Physicochemical soil parameters and stoichiometry across ice-wedge polygon types.

|                                       | LCP                               | FCP                                  | HCP                               | Polygon Type Effect                            |
|---------------------------------------|-----------------------------------|--------------------------------------|-----------------------------------|------------------------------------------------|
| Bulk Density (g DW cm <sup>-3</sup> ) | 0.31 ± 0.05 (a) <sub>[n=19]</sub> | 0.64 ± 0.10 (a) <sub>[n=30]</sub>    | 0.55 ± 0.08 (a) <sub>[n=26]</sub> | p = 0.231 (Chi <sup>2</sup> = 2.93)            |
| pH (MQ)                               | 5.72 ± 0.09 (b)                   | 5.92 ± 0.05 (a)                      | 5.66 ± 0.06 (b)                   | <b>p = 0.004</b> (Chi <sup>2</sup> = 10.92)    |
| SWC (g g <sup>-1</sup> DW)            | 2.93 ± 0.33 (a)                   | 2.20 ± 0.32 (a)                      | 2.03 ± 0.27 (a)                   | p = 0.603 (F = 0.51)                           |
| δ <sup>13</sup> C (‰)                 | -27.90 ± 0.13 (a)                 | -26.73 ± 0.12 (b)                    | -27.42 ± 0.18 (a)                 | <b>p &lt; 0.0001</b> (Chi <sup>2</sup> = 22.1) |
| δ <sup>15</sup> N (‰)                 | 0.34 ± 0.13 (b)                   | 1.31 ± 0.20 (a)                      | 1.63 ± 0.22 (a)                   | <b>p = 0.002</b> (F = 9.77)                    |
| Soil C (mg g <sup>-1</sup> DW)        | 312.37 ± 30.81 (a)                | 204.19 ± 21.68 (a)                   | 229.65 ± 23.34 (a)                | <b>p = 0.059</b> (F = 3.31)                    |
| Soil N (mg g <sup>-1</sup> DW)        | 18.1 ± 1.90 (a)                   | 10.04 ± 0.91 (b)                     | 12.14 ± 1.21 (b)                  | <b>p = 0.003</b> (Chi <sup>2</sup> = 11.72)    |
| Soil P (mg g <sup>-1</sup> DW)        | 0.43 ± 0.03 (*int)                | 0.68 ± 0.05 (*int) <sub>[n=30]</sub> | 0.63 ± 0.06 (*int)                | <b>p = 0.007</b> (F = 5.34)                    |
| Soil C:N                              | 17.54 ± 0.37 (a)                  | 20.09 ± 1.57 (a)                     | 19.42 ± 0.98 (a)                  | p = 0.375 (Chi <sup>2</sup> = 3.11)            |
| Soil C:P                              | 783.09 ± 91.44 (a)                | 305.98 ± 31.02 (b) <sub>[n=30]</sub> | 389.45 ± 37.03 (b)                | <b>p &lt; 0.0001</b> (F = 22.07)               |
| Soil N:P                              | 45.06 ± 5.30 (a)                  | 15.49 ± 1.04 (b) <sub>[n=30]</sub>   | 20.05 ± 1.70 (b)                  | <b>p &lt; 0.0001</b> (F = 37.7)                |
| DOC (µg g <sup>-1</sup> DW)           | 551.99 ± 76.89 (a)                | 355.06 ± 64.63 (a)                   | 400.95 ± 87.34 (a)                | p = 0.076 (Chi <sup>2</sup> = 5.15)            |
| TDN (µg g <sup>-1</sup> DW)           | 38.51 ± 6.07 (a)                  | 26.63 ± 7.57 (a)                     | 30.89 ± 6.14 (a)                  | p = 0.404 (F = 0.95)                           |
| DOC:TDN                               | 17.69 ± 2.66 (a)                  | 20.49 ± 3.21 (a)                     | 16.01 ± 2.32 (a)                  | p = 0.122 (F = 2.17)                           |

Presented are means ± SE (LCP: n = 20, FCP: n = 32, HCP: n = 29; with deviations noted in the table). Statistical results from linear mixed-effects models (Type II ANOVA; p-values and F-statistics) are shown in the right column. When model assumptions were not met, Kruskal Wallis tests were applied (p-values and Chi<sup>2</sup> statistics). Pairwise comparisons (Tukey-adjusted estimated marginal means or Bonferroni-adjusted pairwise Wilcoxon tests) are indicated by letter groupings in brackets. Significant interactions between polygon type and soil layer are marked with (\*int). **Interactive effects:** Soil P (mg g<sup>-1</sup> DW) was significantly lower in the organic layer of LCPs compared to FCPs and HCPs (LME: p = 0.049, F = 2.4; pairwise comparisons for the organic layer: LCP vs. FCP p = 0.0001, t = -4.5;

*LCP vs. HCP  $p < 0.0001$ ,  $t = -4.8$ ). Abbreviations: SWC = soil water content, DOC = dissolved organic carbon, TDN = total dissolved nitrogen; HCPs = high-centered-, FCPs = flat-centered-, LCPs = low-centered polygons.*

**Table S2 (b).** Physicochemical soil parameters and stoichiometry across soil layers.

|                                       | organic                   | mineral                   | cryoturbated          | permafrost         | Soil Layer Effect                               |
|---------------------------------------|---------------------------|---------------------------|-----------------------|--------------------|-------------------------------------------------|
| Bulk Density (g DW cm <sup>-3</sup> ) | 0.20 ± 0.02 (c)           | 1.27 ± 0.08 (a) [n=13]    | 0.64 ± 0.10 (b) [n=8] | 0.56 ± 0.09 (b)    | <b>p &lt; 0.0001</b> (Chi <sup>2</sup> = 49.02) |
| pH (MQ)                               | 5.63 ± 0.06 (b)           | 5.91 ± 0.06 (ab)          | 5.80 ± 0.09 (ab)      | 5.94 ± 0.06 (a)    | <b>p = 0.009</b> (Chi <sup>2</sup> = 11.51)     |
| SWC (g g <sup>-1</sup> DW)            | 3.72 ± 0.23 (a)           | 0.45 ± 0.03 (c)           | 1.41 ± 0.19 (b)       | 1.75 ± 0.18 (b)    | <b>p &lt; 0.0001</b> (F = 80.21)                |
| δ <sup>13</sup> C (‰)                 | -27.34 ± 0.15 (a)         | -27.59 ± 0.26 (a)         | -27.16 ± 0.23 (a)     | -26.96 ± 0.17 (a)  | p = 0.203 (Chi <sup>2</sup> = 4.60)             |
| δ <sup>15</sup> N (‰)                 | 1.39 ± 0.20 (a)           | 1.58 ± 0.29 (ab)          | 1.04 ± 0.21 (bc)      | 0.61 ± 0.26 (c)    | <b>p &lt; 0.0001</b> (F = 8.14)                 |
| Soil C (mg g <sup>-1</sup> DW)        | 351.19 ± 15.53 (a)        | 63.33 ± 7.58 (c)          | 185.39 ± 19.29 (b)    | 202.80 ± 19.33 (b) | <b>p &lt; 0.0001</b> (F = 63.24)                |
| Soil N (mg g <sup>-1</sup> DW)        | 18.42 ± 1.03 (a)          | 3.65 ± 0.40 (c)           | 10.11 ± 1.09 (b)      | 10.95 ± 0.89 (b)   | <b>p &lt; 0.0001</b> (Chi <sup>2</sup> = 50.12) |
| Soil P (mg g <sup>-1</sup> DW)        | 0.73 ± 0.05 (*int) [n=34] | 0.46 ± 0.05 (*int) [n=13] | 0.54 ± 0.07 (*int)    | 0.49 ± 0.04 (*int) | <b>p &lt; 0.0001</b> (F = 10.92)                |
| Soil C:N                              | 20.69 ± 1.57 (a)          | 17.41 ± 0.91 (a)          | 18.64 ± 0.59 (a)      | 18.24 ± 0.44 (a)   | p = 0.375 (Chi <sup>2</sup> = 3.11)             |
| Soil C:P                              | 590.98 ± 64.14 (a) [n=34] | 158.62 ± 16.14 (b) [n=13] | 374.08 ± 38.28 (a)    | 479.85 ± 62.08 (a) | <b>p &lt; 0.0001</b> (F = 23.11)                |
| Soil N:P                              | 31.67 ± 3.73 (a) [n=34]   | 8.80 ± 0.70 (b) [n=13]    | 20.07 ± 1.92 (a)      | 26.06 ± 3.37 (a)   | <b>p &lt; 0.0001</b> (F = 28.66)                |
| DOC (µg g <sup>-1</sup> DW)           | 739.61 ± 68.61 (a)        | 59.74 ± 5.07 (c)          | 173.95 ± 25.55 (b)    | 265.52 ± 46.41 (b) | <b>p &lt; 0.0001</b> (Chi <sup>2</sup> = 54.21) |
| TDN (µg g <sup>-1</sup> DW)           | 50.36 ± 7.52 (a)          | 4.04 ± 0.74 (c)           | 15.54 ± 2.63 (b)      | 26.16 ± 4.82 (b)   | <b>p &lt; 0.0001</b> (F = 44.92)                |
| DOC:TDN                               | 22.13 ± 3.19 (a)          | 22.16 ± 3.83 (a)          | 13.19 ± 1.69 (b)      | 11.43 ± 1.07 (b)   | <b>p &lt; 0.0001</b> (F = 8.22)                 |

Presented are means ± SE (organic: n = 35; mineral: n = 14; cryoturbated: n = 13, permafrost: n = 19; with deviations noted in the table). Statistical results from linear mixed-effects models (Type II ANOVA; p-values and F-statistics) are shown in the right column. When model assumptions were not met, Kruskal Wallis tests were applied (p-values and Chi<sup>2</sup> statistics). Pairwise comparisons (Tukey-adjusted estimated marginal means or Bonferroni-adjusted pairwise Wilcoxon tests) are indicated by letter groupings in brackets. Significant interactions between polygon type and soil layer are marked with (\*int). **Interactive effects:** In LCPs, soil layers had similar soil P concentrations, while in FCPs and HCPs, the organic layer had higher P concentrations compared to the mineral and permafrost layers (LME: p = 0.049, F = 2.4; pairwise comparisons for the organic vs. mineral layer: FCP: p = 0.0002, t = 4.6; HCP: p = 0.0017, t = 3.9; and the organic vs. permafrost layer: FCP: p = 0.063, t = 2.6; HCP: p = 0.005, t = 3.5). Abbreviations: SWC = soil water content, DOC = dissolved organic carbon, TDN = total dissolved nitrogen; HCPs = high-centered-, FCPs = flat-centered-, LCPs = low-centered polygons.

### 1 S3. Chemical composition of soil organic matter

2 We used Pyrolysis- GC/MS for obtaining characteristic fingerprints of the chemical composition of the  
3 soil organic matter pools among the investigated ice-wedge polygon types and soil layer categories.  
4 Therefore, we used a semi-automated approach as explained in Martin et al., (2024), with minor  
5 adaptations.

6 Approximately 0.1 to 0.2 mg of dried and finely milled soil samples were weighed into pyrolysis glass  
7 tubes (constricted Quartz Tubes for 6000 DISC and Autosampler, CDS Analytical) deploying a  
8 randomized sample order. Ideal sample amounts (adapted to respective soil C concentrations) were  
9 determined in pre-tests. We compiled a mixed reference sample out of four randomly selected samples,  
10 representing different soil layers, polygon types and sampling areas. To ensure consistent quality of the  
11 instruments' performance throughout the runs we included multiple technical replicates of an external  
12 soil standard (IHSS Elliott Soil Humic Acid Standard IV) as well as for the mixed reference sample. To  
13 account for possible contamination of the glass tubes, we included several blanks throughout the  
14 sample sequence. Samples were pyrolyzed (Pyroprobe 6200 and Autosampler 6250T, CDS) at an initial  
15 temperature of 50 °C (5 sec) followed by a ramp increase of 20 °C/sec and a final temperature of 600  
16 °C (20 sec). Pyrolysis products were transferred into the GC-TOF-MS system (Pegasus BT GC-MS,  
17 LECO) with a constant target flow of 1mL helium/min at 280 °C. After each sample the pyrolysis  
18 chamber was heated to 1,000 °C for 60 seconds and flushed clean for the next sample. A polar column  
19 (Supelcowax TM 10 Fused Silica Capillary Column, 30 m x 0.25 mm x 0.25 µm film thickness, Sigma-  
20 Aldrich) was used. The GC was kept at 50 °C (2 min), followed by an increase of 7 °C/min until reaching  
21 the final temperature of 250 °C (5 min). All resulting chromatograms were analyzed with ChromaTOF  
22 software (version 5.51.50.068774, LECO).

23 After visually checking the regularity of the chromatograms from the three technical replicates of the  
24 mixed reference sample, one was selected for subsequent manual analysis and creation of a so-called  
25 "reference sample compound library". Therefore, we compared the mass spectrum of each individual  
26 peak within the chromatogram to suggested spectra from the electron ionization (EI) mass spectral  
27 libraries "mainlib" and "replib", contained in the NIST Library of Mass Spectrometry (U.S. Department  
28 of Commerce National Institute of Standards and Technology). Prior to confirming the identity of an  
29 individual substance, we additionally consulted (i) the fit to in literature reported retention times, (ii)  
30 revised the substances' relative position within a sequence of other identified compounds (this is  
31 particularly helpful for long-chained alkanes) and (iii) compared the in ChromaTOF included probability  
32 assessment of the observed ion m/z versus expected ion m/z. Following this process, we obtained a  
33 list of identified (e.g., "1-Dodecene") compounds plus compounds which we could not clearly assign to  
34 an entry from the NIST libraries, but which we could identify via their unique mass spectrum (e.g.,  
35 "Peak\_1").

36 From this data, we created a library of pyrolysis products that was employed for the subsequent semi-  
37 automated analysis of all samples and blanks. Hence, only substances that were included in the library  
38 were considered for the subsequent steps. Since this library of pyrolysis products is project specific, it

39 holds representative characteristics of the SOM pool of the respective sampling area. We employed the  
40 library-matching algorithm implemented in ChromaTOF and performed an automated targeted  
41 compound search for all compounds contained in the library. In this manner, we could reference  
42 substances within samples and blanks to those of the library. The  $m/z$  spectrum of every peak within  
43 an extracted-ion sample chromatogram (XIC) was compared to the deconvoluted spectrum of the  
44 substance from the library. A similarity match score (min. score = 1, max. score= 1000) provided  
45 information about the respective fit of the match. For the process of automated hit assignment, we set  
46 the minimum similarity match threshold to > 700 (the reliability of this threshold was evaluated during  
47 pre-tests in the phase of method development). Further, we set the threshold of the min. peak signal to  
48 noise ratio (S/N) >100 to remove background noise within the chromatograms (see also  
49 10.5281/zenodo.18631833. After completion of the automated assignments via the algorithm, we  
50 manually checked the correctness of the automatically matched pyrolysis substances (e.g., “1-  
51 Dodecene”, “Peak\_1”) by visual assessment and corrected wrong assignments. Such manual  
52 confirmation avoids wrong assignments due to very similar spectra (such as i.e., found with long-  
53 chained alkanes), but also allows to include the small fraction of compounds into the dataset, where  
54 manual identification is possible, but where the automatic matching algorithm failed (due to not meeting  
55 the similarity-threshold-criterium). Following these steps, we derived a presence-absence list from all  
56 pyrolysis products listed in the library (“1-Dodecene”, “Peak\_1”), plus their corresponding peak areas  
57 from all soil samples and blanks. To control for possible contamination in the pyrolysis system or the  
58 glass tubes, a blank correction step was performed on the dataset. Therefore, we subtracted mean  
59 areas of substances found in blanks from the area of the respective substance within the samples.  
60 Further, we normalized the sample chromatogram peak areas with respective soil carbon contents and  
61 the pyrolyzed amount of sample, as both factors can influence peak area and baseline height. Following  
62 the assumption that the sum of all pyrolysis-product-areas within a sample equals its carbon content,  
63 allowed us to calculate individual substance abundances ( $\text{mg C g}^{-1}$  soil DW).

64 We employed the phyloseq” package (McMurdie and Holmes, 2013) for handling the dataset, with (i)  
65 substance abundances being equivalent to the OTU-abundance matrix, (ii) SOM compound group  
66 classification being equivalent to taxonomic information, and (iii) metadata including information on  
67 polygon type and soil layer category. We excluded rare pyrolysis compounds accounting for less than  
68 0.1 % of the total C content per sample. This step helped to reduce the size of the dataset by identifying  
69 those substances with a significant contribution to the respective overall sample peak area. From a total  
70 of 1387 pyrolysis products in the initial dataset, 534 were consequentially considered for the final SOM  
71 fingerprint.

72 We assigned these 534 pyrolysis products to the following SOM compound groups: (1) “aromatics &  
73 phenols [n=51]”, (2) “carbohydrates” [n=48], (3) “N-containing compounds” [n=42], (4) “lignin-derived  
74 compounds” [n=16], and (5) “lipids” [n=68], with the classification being supported by literature  
75 (Buurman et al., 2005; González-Pérez et al., 2012; Hempfling and Schulten, 1990; Nannes et al., 2017;  
76 Said et al., 2015; Saiz-Jimenez and De Leeuw, 1986; Schulten and Schnitzer, 1997; Shen et al., 2018;  
77 Stewart, 2012; Tolu et al., 2015; Vancampenhout et al., 2009). In case of no available literature

78 reference, we assigned the compound to one of the mentioned SOM groups based on their molecular  
 79 structure, employing the US National Library of Medicine (NCBI) PubChem compound database (Kim  
 80 et al., 2023). We summarized substances that we could not assign to one of the aforementioned  
 81 compound groups (e.g., “Cyclononasiloxane”), plus all compounds that were matched to a nameless  
 82 substance in the library (e.g., “Peak\_1”) in a group that we called (6) “general & unknown compounds”  
 83 [n=309]. A detailed list of all considered pyrolysis products (n = 534) and their assignment to SOM  
 84 compound groups is available under 10.5281/zenodo.18631833.

**Table S3.** Correlations between soil organic matter (SOM) compound group abundances and soil carbon content.

| Compound Class (mg C g <sup>-1</sup> DW) | Soil C (mg g <sup>-1</sup> DW)           |
|------------------------------------------|------------------------------------------|
| Aromatics & Phenols                      | $\rho$ (79) = 0.92; <b>p &lt; 0.0001</b> |
| Carbohydrates                            | $\rho$ (79) = 0.95; <b>p &lt; 0.0001</b> |
| General & Unknown                        | $\rho$ (79) = 0.92; <b>p &lt; 0.0001</b> |
| Lignins                                  | $\rho$ (79) = 0.77; <b>p &lt; 0.0001</b> |
| Lipids                                   | $\rho$ (79) = 0.90; <b>p &lt; 0.0001</b> |
| N- Containing                            | $\rho$ (79) = 0.98; <b>p &lt; 0.0001</b> |

*Presented are Spearman’s rank-order correlation coefficients ( $\rho$ ) with corresponding degrees of freedom (df) and two-sided p-values.*

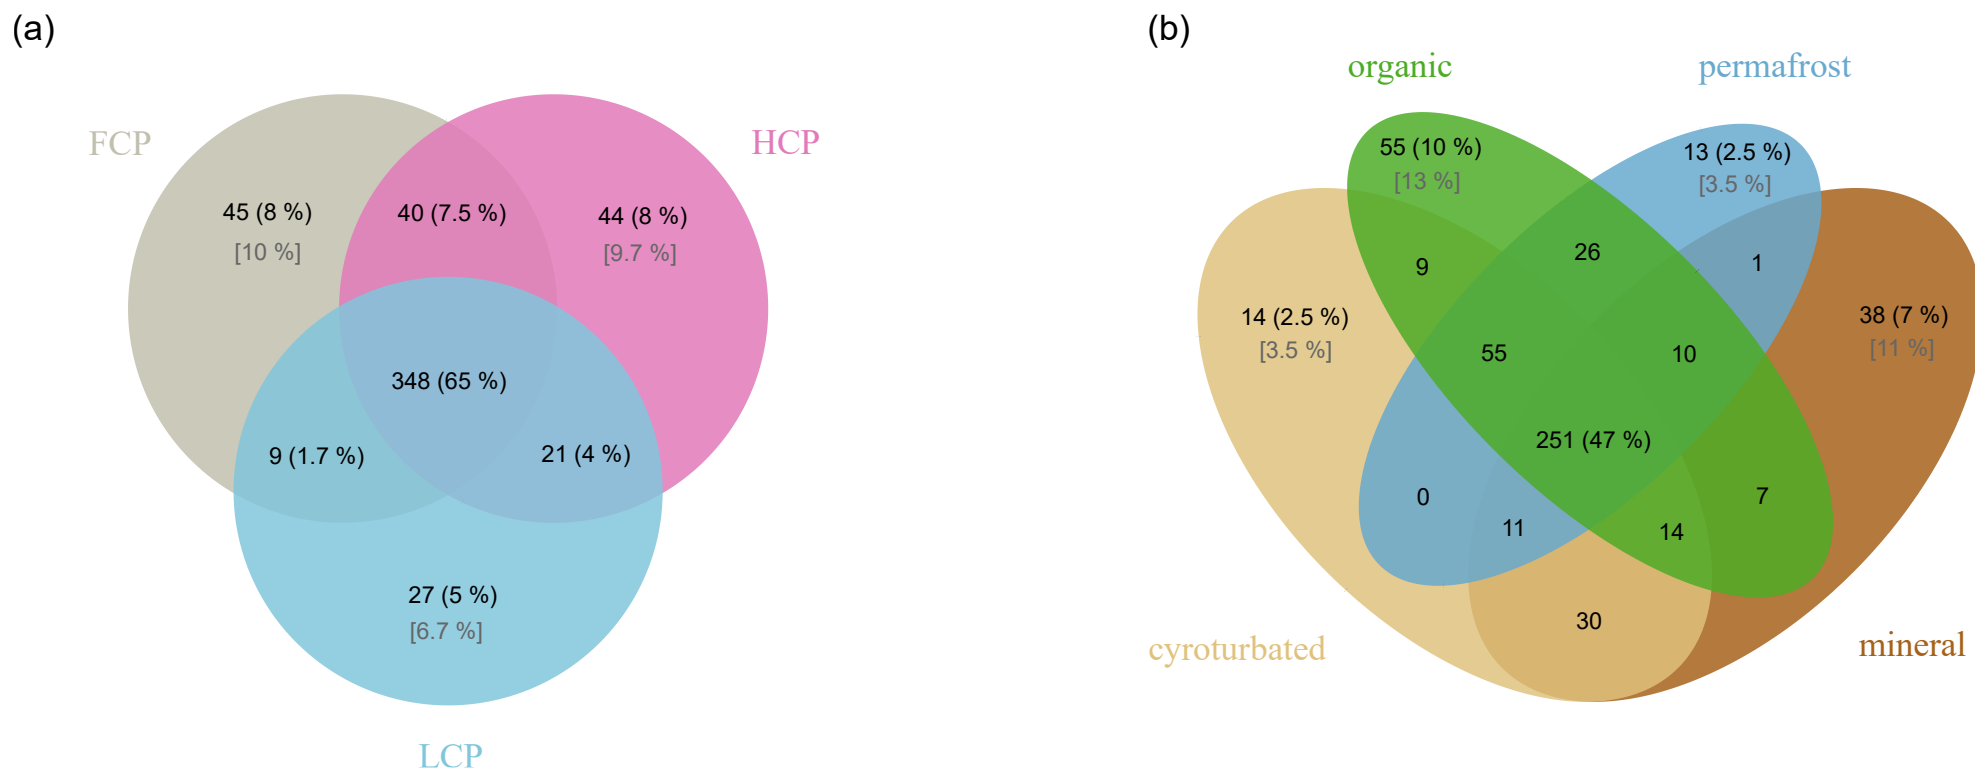

**Figure S2.** Venn Diagrams depicting the number of shared and unique pyrolysis products among (a) ice-wedge polygon types (low-centered polygon, LCP,  $n = 20$ ; flat-centered polygon, FCP,  $n = 32$ ; high-centered polygon, HCP,  $n = 29$ ), and (b) soil layers (organic topsoil,  $n = 35$ ; mineral subsoil,  $n = 14$ ; cryoturbated material,  $n = 13$ ; permafrost,  $n = 19$ ). Fractions of shared and unique pyrolysis products relative to the total number of substances ( $n = 534$ ) are shown as percentages (%; black). The proportion of polygon-specific or soil layer-specific pyrolysis products relative to the number of pyrolysis products within each polygon type or soil layer are given in [%; grey].

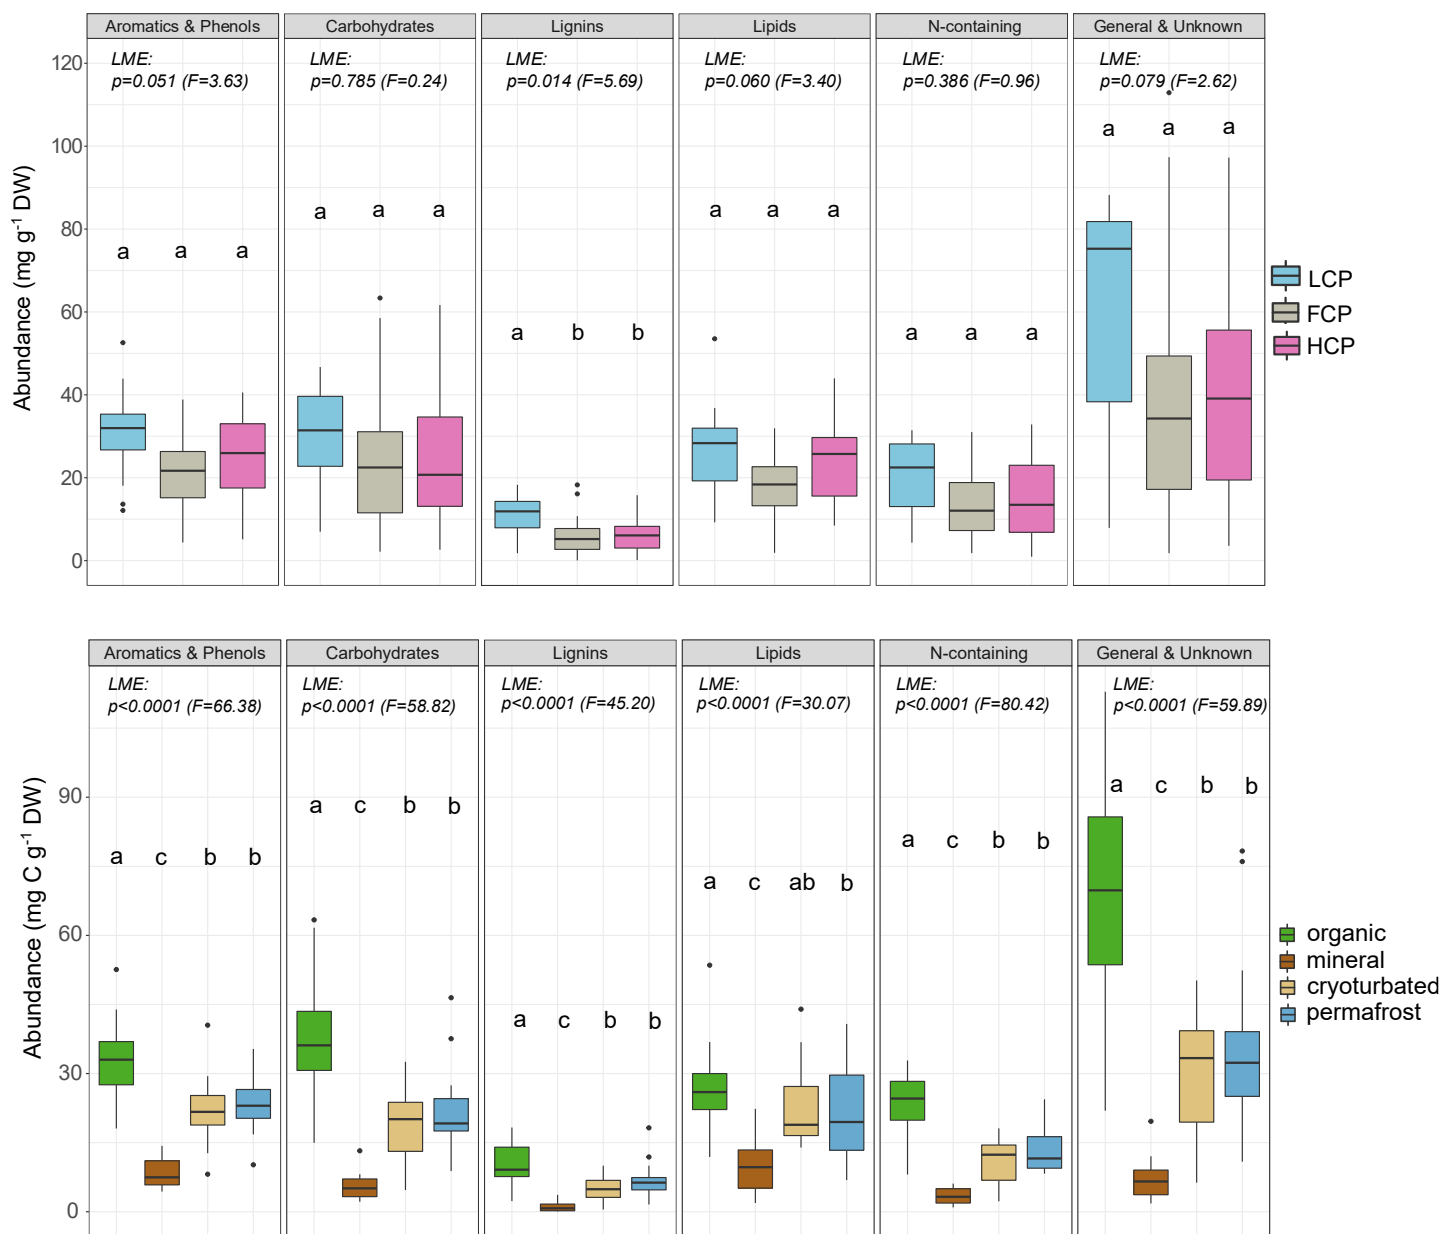

**Figure S3.** Abundances (mg g<sup>-1</sup> DW soil) of soil organic matter (SOM) compound groups across (a) ice-wedge polygon types (low-centered polygon, LCP, n = 20; flat-centered polygon, FCP, n = 32; high-centered polygon, HCP, n = 29) and across (b) soil layers (organic topsoil, n = 35; mineral subsoil, n = 14; cryoturbated material, n = 13; permafrost, n = 19). Statistical results from linear mixed-effects models (Type II ANOVA;  $p$ -values and F-statistics) are shown in respective panels. Results from pairwise comparisons (Tukey-adjusted estimated marginal means) are indicated by letter groupings. No interactive effects between polygon type and soil layer were observed.

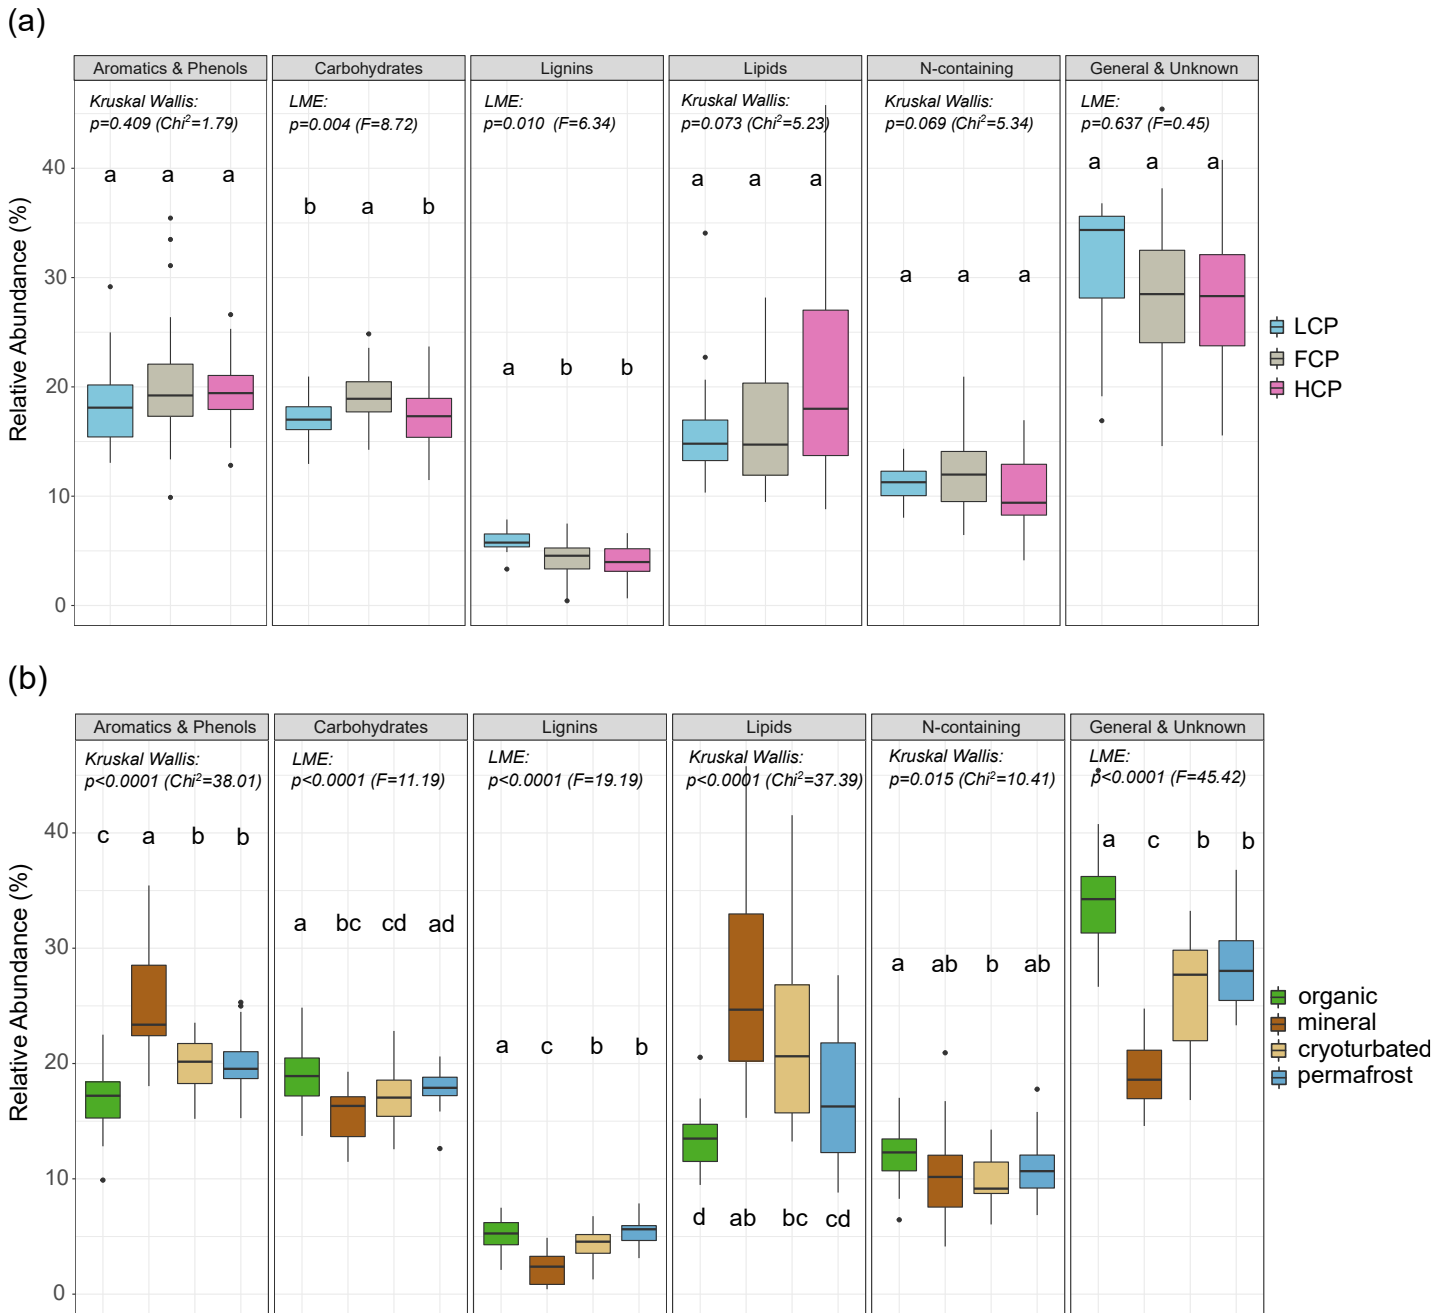

**Figure S4.** Relative abundances (%) of soil organic matter (SOM) compound groups across (a) ice-wedge polygon types (low-centered polygon, LCP,  $n = 20$ ; flat-centered polygon, FCP,  $n = 32$ ; high-centered polygon, HCP,  $n = 29$ ) and across (b) soil layers (organic topsoil,  $n = 35$ ; mineral subsoil,  $n = 14$ ; cryoturbated material,  $n = 13$ ; permafrost,  $n = 19$ ). Statistical results from linear mixed-effects models (Type II ANOVA;  $p$ -values and  $F$ -statistics) are shown in respective panels. When model assumptions were not met, Kruskal–Wallis tests were applied ( $p$ -values and  $\text{Chi}^2$  statistics). Results from pairwise comparisons (Tukey-adjusted estimated marginal means or Bonferroni-adjusted pairwise Wilcoxon tests) are indicated by letter groupings in brackets. No interactive effects between polygon type and soil layer were observed.

## 85 S4. Soil microbial communities

86 In this study, 'microbial communities' specifically refers to bacterial, archaeal, and fungal taxa profiled  
87 by amplicon sequencing the V4 region of the 16S rRNA gene and the ITS1 region, as these groups  
88 represent the primary decomposers in permafrost-affected soils. Despite their ecological relevance, we  
89 did not include groups such as micro-eukaryotes and viruses, as their consideration would have  
90 required alternative workflows (e.g., metagenomics or metatranscriptomics)

91 We extracted microbial DNA using the FastDNA™ SPIN Kit for Soil (MP Biomedicals, Santa Ana, USA)  
92 following the manufacturers' instructions but with minor modifications for cleaning the samples from the  
93 RNeasy™ Stabilization Solution. For cleaning, we added 1 ml sodium phosphate buffer (contained in  
94 the kit) and vortexed gently. After a short centrifugation step, we discarded the supernatant without  
95 disturbing the soil pellet and repeated the procedure five consecutive times. Subsequently, we followed  
96 the conventional DNA extraction protocol. Due to the large differences in bulk density, soil C and the  
97 assumed discrepancy in microbial biomass between the organic layer and the other layers, we used  
98 250 mg FW soil from the organic topsoil and 400 mg FW soil from all other soil layers respectively. To  
99 control for potential contamination, extraction blanks were included and subjected to subsequent  
100 quantification and sequencing steps. DNA extracts were treated with the OneStep PCR Inhibitor  
101 Removal Kit (Zymo Research, Irvine, CA, USA) to remove possibly occurring inhibitory polyphenolics,  
102 humic- and fulvic acids, and tannins. DNA concentrations were quantified using the Quant-iT™  
103 PicoGreen® dsDNA Assay Kit (Thermo Fisher Scientific, Waltham, USA).

104 Amplicon sequencing and raw data processing was performed at the Joint Microbiome Facility of the  
105 Medical University of Vienna and the University of Vienna (JMF project ID JMF-2008-5). Datasets are  
106 deposited in the NCBI Sequence Read Archive under BioProject accession number (PRJNA1274918).  
107 We used DNA extracts that have been normalized to a concentration of 0.5 ng  $\mu\text{l}^{-1}$  (no sample required  
108 concentration; dilution factors ranged between  $18 \pm 5$  (mean  $\pm$  stderr) for samples from permafrost,  $27$   
109  $\pm 4$  from mineral,  $48 \pm 10$  for cryoturbated, and  $45 \pm 5$  for organic topsoil layers). This normalization step  
110 accounts for variation in extraction yields due to differential biomass and dilutes potential PCR inhibitors  
111 in addition.

112 A two-step barcoding approach was employed to generate amplicon libraries of archaeal, bacterial, and  
113 fungal communities using Illumina MiSeq (V3 Kit; 2 x 300 bp configuration, 1% PhiX spike-in), following  
114 (Pjevac et al., 2021). The V4 hypervariable region of the 16S rRNA gene was amplified using primer  
115 pairs 515F (GTGYCAGCMGCCGCGGTAA, (Parada et al., 2016)) and 806R  
116 (GGACTACNVGGGTWTCTAAT, (Apprill et al., 2015)). The fungal ITS1 region was amplified using  
117 primer pairs ITS1F (CTTGGTCATTTAGAGGAAGTAA, (Smith and Peay, 2014)) and ITS2  
118 (GCTGCGTTCTTCATCGATGC, (White et al., 1990)). We note that applying ASV-based approaches  
119 to fungal ITS regions may be affected by high sequence variability and intra-genomic variation,  
120 potentially influencing taxonomic resolution.

121 First-step 25  $\mu$ l PCR reactions consisted of 1x DreamTaq Green PCR master mix, 0.1  $\mu$ g  $\mu$ l<sup>-1</sup> BSA, 0.25  
122  $\mu$ mol l<sup>-1</sup> of each headed primer, and 2  $\mu$ l of DNA template. We used the following amplification  
123 conditions:

- 124 • 16S rRNA gene: initial denaturation at 94 °C for 3 min, followed by 30 cycles of 94 °C for 45 s,  
125 52 °C for 60 s and 72 °C for 60 s, and final elongation at 72 °C for 10 min.
- 126 • ITS1 region: 94 °C for 1 min, 35 cycles of 94 °C for 45 s, 52 °C for 60 s and 72 °C for 90 s,  
127 followed by final elongation at 72 °C for 10 min.

128 Datasets were deposited in the NCBI Sequence Read Archive under BioProject accession number  
129 (PRJNA1274918). The original sequencing data is also accessible under 10.5281/zenodo.18631833.

130 Prior downstream analyses, we cleaned the amplicon sequencing datasets from non-archaeal, -  
131 bacterial, or -fungal sequences and excluded samples with less than 500 obtained reads (exclusion of  
132 two samples from the 16S rRNA, and exclusion of 3 samples from the ITS1 datasets, respectively).  
133 Contaminant sequences were removed on an ASV-specific basis by subtracting the highest observed  
134 read number in one of the DNA extraction blanks from the corresponding sample reads (resulting read  
135 distributions were carefully investigated). To standardize sequencing depth across samples, we rarefied  
136 these datasets (using the `rarefy_even_depth()`-function implemented in `phyloseq` with replacement-  
137 argument `==F`; and determined cut-offs at 2650 16S rRNA reads and at 543 ITS1 reads, respectively).  
138 We assessed  $\alpha$ -diversity as richness (number of observed ASVs) and Shannon diversity. We note that  
139  $\alpha$ -diversity estimates based on fungal ITS ASVs may be inflated due to intra-genomic and intra-specific  
140 variability and should therefore be interpreted with caution.

141 Digital droplet PCR (ddPCR) was performed to quantify 16S rRNA genes and ITS1 regions with the  
142 same primers used for sequencing. Each ddPCR reaction had a volume of 22  $\mu$ L and consisted of 1x  
143 QX200 ddPCR EvaGreen Supermix (BioRad), 0.1  $\mu$ mol L<sup>-1</sup> of each primer and 0.05 and 0.025 ng of  
144 template for the quantification of 16S rRNA genes and ITS1 regions, respectively. Droplets were  
145 generated on a QX200™ Droplet Generator (BioRad) and immediately subjected to PCR amplification  
146 (amplification conditions in Table S4). PCR products in droplets were kept at 4 °C over night to increase  
147 their separation before measuring their fluorescence intensity on a QX200™ Droplet Reader (BioRad).  
148 Gene copy numbers were calculated using the QX ONE Software Standard Edition (v. 1.2, BioRad)  
149 where thresholds between positive and negative droplet populations were set consistently for each  
150 sample using the histogram as a guide. We expressed final ddPCR results as 16S rRNA and ITS1 gene  
151 copy numbers g<sup>-1</sup> DW soil and used them as abundance proxies for bacteria and archaea, and fungi,  
152 respectively. We note that we did not explicitly correct for taxon-specific ribosomal gene copy number  
153 variation, and that ddPCR-derived abundance estimates therefore do not directly reflect microbial cell  
154 numbers.

**Table S4.** Cycling conditions used for digital droplet PCR (ddPCR) amplification of 16S rRNA genes and ITS1 regions, including temperature steps, cycle numbers, and reaction parameters.

| <b>Temperature</b>                              | <b>Time</b> | <b>Cycles</b> | <b>Details</b>    | <b>Comments</b>                                    |
|-------------------------------------------------|-------------|---------------|-------------------|----------------------------------------------------|
| <b>16S rRNA ddPCR quantification conditions</b> |             |               |                   |                                                    |
| 95 °C                                           | 5 min       |               |                   | add a temperature ramp of 2 °C/second to all steps |
| 95 °C                                           | 30 s        | x 5           | -1 °C every cycle |                                                    |
| 57 °C                                           | 120 s       |               |                   |                                                    |
| 95 °C                                           | 30 s        | x 35          |                   |                                                    |
| 52 °C                                           | 120 s       |               |                   |                                                    |
| 4 °C                                            | 5 min       |               |                   |                                                    |
| 90 °C                                           | 5 min       |               |                   |                                                    |
| 4 °C                                            | hold        |               |                   |                                                    |

| <b>Temperature</b>                                 | <b>Time</b> | <b>Cycles</b> | <b>Details</b>    | <b>Comments</b>                                   |
|----------------------------------------------------|-------------|---------------|-------------------|---------------------------------------------------|
| <b>ITS1 Region ddPCR quantification conditions</b> |             |               |                   |                                                   |
| 95 °C                                              | 5 min       |               |                   | add a temperature ramp of 2°C/second to all steps |
| 95 °C                                              | 30 s        | x 5           | -1 °C every cycle |                                                   |
| 60 °C                                              | 120 s       |               |                   |                                                   |
| 95 °C                                              | 30 s        | x 35          |                   |                                                   |
| 55 °C                                              | 120 s       |               |                   |                                                   |
| 4 °C                                               | 5 min       |               |                   |                                                   |
| 90 °C                                              | 5 min       |               |                   |                                                   |
| 4 °C                                               | hold        |               |                   |                                                   |

155 To derive ddPCR-informed abundance estimates, we followed the framework of quantitative  
156 microbiome profiling (Vandeputte et al., 2017), in which amplicon-based relative abundances are scaled  
157 using gene copy numbers. Accordingly, we calculated ASV-level abundance estimates (gene copy  
158 number corrected reads per g soil DW) by multiplying the 16S rRNA or ITS1 gene copy numbers  
159 measured in ddPCR assays with their respective relative abundances from the amplicon sequencing  
160 datasets (based on the raw reads-dataset after removal of non-archaeal, -bacterial, or -fungal

161 sequences, exclusion of samples with less than 500 obtained reads, and blank-correction). In the next  
162 step, we excluded rare bacterial, archaeal, and fungal taxa (defined as containing less than 0.05 % of  
163 all gene copy number corrected reads per sample), which resulted in 3643 bacterial and 137 archaeal  
164 ASVs (classified into 47 phyla, 111 classes, 201 orders, 247 families, and 308 genera) and 1604 fungal  
165 ASVs (classified into 7 phyla, 19 classes, 44 orders, 77 families and 101 genera) being considered in  
166 the follow-up analyses. of certain phyla (ddPCR-corrected reads per g DW aggregated on phylum level)  
167 between polygon types and soil layer categories. The data is accessible under  
168 [10.5281/zenodo.18631833](https://zenodo.org/record/18631833).

169 To visualize microbial community composition ( $\beta$ -diversity) we followed a widely acknowledged  
170 approach for handling compositional data (e.g., Alteo et al., 2021; Barlow et al., 2020; Gloor et al.,  
171 2017). For this, we performed Principal Component Analysis (PCA) on center-log-ratio-(clr-)  
172 transformed gene copy number corrected reads g<sup>-1</sup> DW (corresponds to Aitchison distance, Aitchison,  
173 1984).

174 We explored potential ecological roles of fungal communities using the FungalTraits database (Pölme  
175 et al., 2020). To balance ecological interpretability and assignment confidence, we performed trait-  
176 based annotations at the genus level, since higher taxonomic ranks often encompass multiple or  
177 ambiguous ecological strategies. Using this approach, approximately 18 % of fungal ASVs in the  
178 dataset could be reliably assigned to functional guilds (82 % remained unclassified). Most prevalent on  
179 the dataset were ectomycorrhizal fungi (6.4 %) and saprotrophs (7.7 %) (encompassing litter-, wood-,  
180 and soil-associated taxa), followed by root endophytes (1 %). Several additional lifestyles (e.g.,  
181 parasitic, lichenized, pathogenic, or specialized saprotrophic fungi) were present but contributed less  
182 than 1 % each. Summary tables of the FungalTraits database assignments including the differential  
183 distribution of guilds across polygon types and soil layers are accessible under  
184 [10.5281/zenodo.18631833](https://zenodo.org/record/18631833).

185 S4.1. Bacterial and archaeal communities

**Table S5.** Interactive effects of polygon type and soil layer category on bacterial and archaeal community composition, based on PERMANOVA analyses corresponding to Figure 3. Reported are Bonferroni-adjusted p-values and F-statistics. Only significant results are shown.

| Comparison                                         | Result           | Test               |
|----------------------------------------------------|------------------|--------------------|
| <b>organic layer across all polygon types</b>      | p=0.001 (F=4.33) | PERMANOVA          |
| LCP vs. FCP                                        | p=0.003 (F=5.29) | Pairwise PERMANOVA |
| LCP vs. HCP                                        | p=0.003 (F=7.16) |                    |
| <b>mineral layer across all polygon types</b>      | p=0.067 (F=1.64) | PERMANOVA          |
| <b>cryoturbated layer across all polygon types</b> | p=0.114 (F=1.54) | PERMANOVA          |
| <b>permafrost layer across all polygon types</b>   | p=0.008 (F=1.57) | PERMANOVA          |
| LCP vs. FCP                                        | p=0.003 (F=2.09) | Pairwise PERMANOVA |
| <hr/>                                              |                  |                    |
| <b>soil layers within LCPs</b>                     | p=0.003 (F=2.24) | PERMANOVA          |
| organic vs. permafrost                             | p=0.006 (F=3.37) | Pairwise PERMANOVA |
| <b>soil layers within FCPs</b>                     | p=0.001 (F=2.65) | PERMANOVA          |
| organic vs. cryoturbated                           | p=0.006 (F=2.80) | Pairwise PERMANOVA |
| organic vs. permafrost                             | p=0.006 (F=4.59) |                    |
| <b>soil layers within HCPs</b>                     | p=0.001 (F=3.80) | PERMANOVA          |
| organic vs. mineral                                | p=0.006 (F=3.94) | Pairwise PERMANOVA |
| organic vs. cryoturbated                           | p=0.006 (F=4.06) |                    |
| organic vs. permafrost                             | p=0.006 (F=5.71) |                    |
| mineral vs. permafrost                             | p=0.024 (F=3.13) |                    |
| cryoturbated vs. permafrost                        | p=0.018 (F=2.66) |                    |

**Table S6.** ddPCR-informed abundance estimates (gene copy number corrected reads g<sup>-1</sup> DW soil) of selected bacterial and archaeal phyla across soil layers per ice-wedge polygon type.

|                  | Soil Layer   | LCP                                       | FCP                                       | HCP                                       | Polygon effect                                                                                                                        | Soil layer effect                                                                                                                        | Interactive effect                                                                        |
|------------------|--------------|-------------------------------------------|-------------------------------------------|-------------------------------------------|---------------------------------------------------------------------------------------------------------------------------------------|------------------------------------------------------------------------------------------------------------------------------------------|-------------------------------------------------------------------------------------------|
| Acidobacteriota  | organic      | 2.54 e <sup>8</sup> ± 1.07 e <sup>8</sup> | 7.27 e <sup>8</sup> ± 1.34 e <sup>8</sup> | 7.64 e <sup>8</sup> ± 1.37 e <sup>8</sup> | Kruskal Wallis: p=0.138;<br>Chi <sup>2</sup> =4.0                                                                                     | Kruskal Wallis: p<0.0001;<br>Chi <sup>2</sup> =42.0<br>Pairwise Wilcox:<br>org-min: p<0.0001<br>org-cryo: p=0.004<br>org-perm: p<0.0001  | Pairwise Wilcox<br>organic:<br><br>LCP-FCP: p=0.036<br>LCP-HCP: p=0.009<br>FCP-HCP: p=1.0 |
|                  | mineral      | 9.36 e <sup>6</sup> ± 4.87 e <sup>6</sup> | 4.11 e <sup>7</sup> ± 9.96 e <sup>6</sup> | 4.69 e <sup>7</sup> ± 1.60 e <sup>7</sup> |                                                                                                                                       |                                                                                                                                          |                                                                                           |
|                  | cryoturbated | -                                         | 5.74 e <sup>7</sup> ± 2.82 e <sup>7</sup> | 1.07 e <sup>8</sup> ± 4.04 e <sup>7</sup> |                                                                                                                                       |                                                                                                                                          |                                                                                           |
|                  | permafrost   | 6.53 e <sup>6</sup> ± 3.09 e <sup>6</sup> | 4.42 e <sup>7</sup> ± 2.09 e <sup>7</sup> | 2.02 e <sup>7</sup> ± 1.11 e <sup>7</sup> |                                                                                                                                       |                                                                                                                                          |                                                                                           |
| Actinobacteriota | organic      | 7.62 e <sup>7</sup> ± 2.43 e <sup>7</sup> | 1.44 e <sup>8</sup> ± 3.31 e <sup>7</sup> | 1.29 e <sup>8</sup> ± 2.10 e <sup>7</sup> | LME: p=0.004; F=6.0<br><br>Emmeans pairwise:<br>LCP-FCP: p=0.023<br>LCP-HCP: p=0.013<br>FCP-HCP: p=0.935                              | LME: p=0.0001; F=11.3<br><br>Emmeans pairwise:<br>org-min: p=0.023<br>org-cryo: p=0.961<br>org-perm: p=0.030                             |                                                                                           |
|                  | mineral      | 1.57 e <sup>7</sup> ± 7.14 e <sup>6</sup> | 2.18 e <sup>7</sup> ± 9.05 e <sup>6</sup> | 3.16 e <sup>7</sup> ± 7.95 e <sup>6</sup> |                                                                                                                                       |                                                                                                                                          |                                                                                           |
|                  | cryoturbated | -                                         | 1.02 e <sup>8</sup> ± 1.65 e <sup>7</sup> | 1.76 e <sup>8</sup> ± 2.39 e <sup>7</sup> |                                                                                                                                       |                                                                                                                                          |                                                                                           |
|                  | permafrost   | 2.06 e <sup>7</sup> ± 8.05 e <sup>6</sup> | 1.15 e <sup>8</sup> ± 4.32 e <sup>7</sup> | 6.45 e <sup>7</sup> ± 2.77 e <sup>7</sup> |                                                                                                                                       |                                                                                                                                          |                                                                                           |
| Armatimonadota   | organic      | 2.86 e <sup>5</sup> ± 1.80 e <sup>5</sup> | 3.19 e <sup>6</sup> ± 1.04 e <sup>6</sup> | 5.12 e <sup>6</sup> ± 1.97 e <sup>6</sup> | Kruskal Wallis: p=0.009;<br>Chi <sup>2</sup> =9.3<br><br>Pairwise Wilcox:<br>LCP-FCP: p=0.008<br>LCP-HCP: p=0.097<br>FCP-HCP: p=0.990 | Kruskal Wallis: p=0.772;<br>Chi <sup>2</sup> =1.1                                                                                        |                                                                                           |
|                  | mineral      | 3.07 e <sup>5</sup> ± 3.07 e <sup>5</sup> | 1.37 e <sup>6</sup> ± 4.41 e <sup>5</sup> | 3.76 e <sup>5</sup> ± 9.97 e <sup>4</sup> |                                                                                                                                       |                                                                                                                                          |                                                                                           |
|                  | cryoturbated | -                                         | 1.63 e <sup>6</sup> ± 1.01 e <sup>6</sup> | 4.99 e <sup>5</sup> ± 2.34 e <sup>5</sup> |                                                                                                                                       |                                                                                                                                          |                                                                                           |
|                  | permafrost   | 4.65 e <sup>5</sup> ± 2.47 e <sup>5</sup> | 2.97e <sup>6</sup> ± 1.59 e <sup>6</sup>  | 7.53 e <sup>5</sup> ± 4.86 e <sup>5</sup> |                                                                                                                                       |                                                                                                                                          |                                                                                           |
| Bacteroidota     | organic      | 5.83 e <sup>8</sup> ± 1.31 e <sup>8</sup> | 1.06 e <sup>9</sup> ± 2.36 e <sup>8</sup> | 1.02 e <sup>9</sup> ± 1.89 e <sup>8</sup> | Kruskal Wallis: p=0.221;<br>Chi <sup>2</sup> =3.0                                                                                     | Kruskal-Wallis: p<0.0001;<br>Chi <sup>2</sup> =29.7<br><br>Pairwise Wilcox:<br>org-min: p<0.0001<br>org-cryo: p=0.429<br>org-perm: 0.008 |                                                                                           |
|                  | mineral      | 7.06 e <sup>7</sup> ± 4.17 e <sup>7</sup> | 1.09 e <sup>8</sup> ± 4.93 e <sup>7</sup> | 1.15 e <sup>8</sup> ± 4.54 e <sup>7</sup> |                                                                                                                                       |                                                                                                                                          |                                                                                           |
|                  | cryoturbated | -                                         | 6.94 e <sup>8</sup> ± 2.20 e <sup>8</sup> | 3.36 e <sup>8</sup> ± 5.58 e <sup>7</sup> |                                                                                                                                       |                                                                                                                                          |                                                                                           |
|                  | permafrost   | 1.21 e <sup>8</sup> ± 2.25 e <sup>7</sup> | 6.26 e <sup>8</sup> ± 1.46 e <sup>8</sup> | 2.68 e <sup>8</sup> ± 7.56 e <sup>7</sup> |                                                                                                                                       |                                                                                                                                          |                                                                                           |
| Bdellovibrionota | organic      | 1.83 e <sup>6</sup> ± 1.13 e <sup>6</sup> | 5.44 e <sup>6</sup> ± 1.48 e <sup>6</sup> | 4.79 e <sup>6</sup> ± 2.05 e <sup>6</sup> | Kruskal Wallis: p=0.0006;<br>Chi <sup>2</sup> =14.9                                                                                   | Kruskal Wallis: p=0.0002;<br>Chi <sup>2</sup> =14.9                                                                                      |                                                                                           |
|                  | mineral      | 2.01 e <sup>5</sup> ± 4.39 e <sup>4</sup> | 1.51 e <sup>6</sup> ± 1.16 e <sup>6</sup> | 1.61 e <sup>6</sup> ± 6.75 e <sup>5</sup> |                                                                                                                                       |                                                                                                                                          |                                                                                           |

|                  |              |                                         |                                         |                                         |                                                                                                                                                       |                                                                                                                                              |                                                                                                     |  |
|------------------|--------------|-----------------------------------------|-----------------------------------------|-----------------------------------------|-------------------------------------------------------------------------------------------------------------------------------------------------------|----------------------------------------------------------------------------------------------------------------------------------------------|-----------------------------------------------------------------------------------------------------|--|
|                  | cryoturbated | -                                       | $8.90 \text{ e}^6 \pm 2.78 \text{ e}^6$ | $7.45 \text{ e}^6 \pm 2.19 \text{ e}^6$ | Pairwise Wilcox:<br>LCP-FCP: $p < 0.0001$<br>LCP-HCP: $p = 0.016$<br>FCP-HCP: $p = 0.904$                                                             | cryo-min: $p = 0.003$<br>cryo-perm: $p = 0.002$                                                                                              |                                                                                                     |  |
|                  | permafrost   | $2.75 \text{ e}^4 \pm 2.75 \text{ e}^4$ | $3.22 \text{ e}^6 \pm 8.21 \text{ e}^5$ | $1.15 \text{ e}^6 \pm 8.83 \text{ e}^5$ |                                                                                                                                                       |                                                                                                                                              |                                                                                                     |  |
| Caldisericota    | organic      | $3.69 \text{ e}^5 \pm 2.45 \text{ e}^5$ | $0.00 \pm 0.00$                         | $0.00 \pm 0.00$                         | Kruskal Wallis: $p = 0.007$ ;<br>Chi <sup>2</sup> =10.0<br>Pairwise Wilcox<br>LCP-FCP: $p = 0.076$<br>LCP-HCP: $p = 0.010$<br>FCP-HCP: $p = 1.00$     | Kruskal Wallis: $p < 0.0001$ ;<br>Chi <sup>2</sup> =25.2<br>The permafrost layer harbored 81 % of ddPCR-corr. reads assigned to this phylum. |                                                                                                     |  |
|                  | mineral      | $8.93 \text{ e}^5 \pm 2.10 \text{ e}^5$ | $2.58 \text{ e}^5 \pm 2.58 \text{ e}^5$ | $0.00 \pm 0.00$                         |                                                                                                                                                       |                                                                                                                                              |                                                                                                     |  |
|                  | cryoturbated | -                                       | $3.69 \text{ e}^5 \pm 2.26 \text{ e}^5$ | $0.00 \pm 0.00$                         |                                                                                                                                                       |                                                                                                                                              |                                                                                                     |  |
|                  | permafrost   | $1.25 \text{ e}^6 \pm 4.43 \text{ e}^5$ | $1.85 \text{ e}^6 \pm 1.04 \text{ e}^6$ | $3.37 \text{ e}^6 \pm 1.91 \text{ e}^6$ |                                                                                                                                                       |                                                                                                                                              |                                                                                                     |  |
| Campylobacterota | organic      | $0.00 \pm 0.00$                         | $0.00 \pm 0.00$                         | $0.00 \pm 0.00$                         |                                                                                                                                                       | The permafrost layer harbored 93 % of ddPCR-corr. reads assigned to this phylum.                                                             |                                                                                                     |  |
|                  | mineral      | $0.00 \pm 0.00$                         | $0.00 \pm 0.00$                         | $0.00 \pm 0.00$                         |                                                                                                                                                       |                                                                                                                                              |                                                                                                     |  |
|                  | cryoturbated | -                                       | $2.48 \text{ e}^5 \pm 2.48 \text{ e}^5$ | $0.00 \pm 0.00$                         |                                                                                                                                                       |                                                                                                                                              |                                                                                                     |  |
|                  | permafrost   | $3.83 \text{ e}^5 \pm 2.86 \text{ e}^5$ | $9.41 \text{ e}^5 \pm 4.78 \text{ e}^5$ | $1.20 \text{ e}^6 \pm 1.11 \text{ e}^6$ |                                                                                                                                                       |                                                                                                                                              |                                                                                                     |  |
| Cloacimonadota   | organic      | $5.06 \text{ e}^5 \pm 3.29 \text{ e}^5$ | $0.00 \pm 0.00$                         | $0.00 \pm 0.00$                         |                                                                                                                                                       | The permafrost layer harbored 68 % of ddPCR-corr. reads assigned to this phylum.                                                             |                                                                                                     |  |
|                  | mineral      | $0.00 \pm 0.00$                         | $3.02 \text{ e}^4 \pm 3.02 \text{ e}^4$ | $0.00 \pm 0.00$                         |                                                                                                                                                       |                                                                                                                                              |                                                                                                     |  |
|                  | cryoturbated | -                                       | $0.00 \pm 0.00$                         | $0.00 \pm 0.00$                         |                                                                                                                                                       |                                                                                                                                              |                                                                                                     |  |
|                  | permafrost   | $9.01 \text{ e}^5 \pm 7.55 \text{ e}^5$ | $9.28 \text{ e}^5 \pm 7.28 \text{ e}^5$ | $2.08 \text{ e}^5 \pm 1.25 \text{ e}^5$ |                                                                                                                                                       |                                                                                                                                              |                                                                                                     |  |
| Cyanobacteria    | organic      | $6.00 \text{ e}^5 \pm 3.68 \text{ e}^5$ | $1.73 \text{ e}^6 \pm 1.03 \text{ e}^6$ | $4.98 \text{ e}^6 \pm 1.70 \text{ e}^6$ | Kruskal Wallis: $p = 0.054$ ;<br>Chi <sup>2</sup> =5.9                                                                                                | Kruskal Wallis: $p = 0.001$ ;<br>Chi <sup>2</sup> =15.6<br>The permafrost layer harbored 1 % of ddPCR-corr. reads assigned to this phylum.   |                                                                                                     |  |
|                  | mineral      | $1.54 \text{ e}^5 \pm 9.11 \text{ e}^4$ | $2.46 \text{ e}^5 \pm 1.79 \text{ e}^5$ | $7.25 \text{ e}^5 \pm 3.85 \text{ e}^5$ |                                                                                                                                                       |                                                                                                                                              |                                                                                                     |  |
|                  | cryoturbated | -                                       | $1.01 \text{ e}^6 \pm 5.02 \text{ e}^5$ | $3.06 \text{ e}^6 \pm 1.40 \text{ e}^6$ |                                                                                                                                                       |                                                                                                                                              |                                                                                                     |  |
|                  | permafrost   | $0.00 \pm 0.00$                         | $1.81 \text{ e}^5 \pm 1.81 \text{ e}^5$ | $0.00 \pm 0.00$                         |                                                                                                                                                       |                                                                                                                                              |                                                                                                     |  |
| Crenarchaeota    | organic      | $9.69 \text{ e}^6 \pm 3.64 \text{ e}^6$ | $2.60 \text{ e}^6 \pm 2.04 \text{ e}^6$ | $0.00 \pm 0.00$                         | Kruskal Wallis: $p < 0.0001$ ;<br>Chi <sup>2</sup> =21.4<br>Pairwise Wilcox:<br>LCP-FCP: $p = 0.014$<br>LCP-HCP: $p < 0.0001$<br>FCP-HCP: $p = 0.131$ | Kruskal Wallis: $p = 0.249$ ;<br>Chi <sup>2</sup> =4.12                                                                                      | Pairwise Wilcox - organic:<br>LCP-FCP: $p = 0.049$<br>LCP-HCP: $p < 0.0001$<br>FCP-HCP: $p = 0.278$ |  |
|                  | mineral      | $2.63 \text{ e}^4 \pm 2.63 \text{ e}^4$ | $3.36 \text{ e}^5 \pm 2.00 \text{ e}^5$ | $6.23 \text{ e}^4 \pm 6.23 \text{ e}^4$ |                                                                                                                                                       |                                                                                                                                              |                                                                                                     |  |
|                  | cryoturbated | -                                       | $9.07 \text{ e}^4 \pm 9.07 \text{ e}^4$ | $0.00 \pm 0.00$                         |                                                                                                                                                       |                                                                                                                                              |                                                                                                     |  |
|                  | permafrost   | $2.57 \text{ e}^5 \pm 1.45 \text{ e}^5$ | $9.62 \text{ e}^4 \pm 6.21 \text{ e}^4$ | $6.33 \text{ e}^4 \pm 4.06 \text{ e}^4$ |                                                                                                                                                       |                                                                                                                                              |                                                                                                     |  |

|                  |              |                                           |                                           |                                           |                                                                                                                                          |                                                     |                                                                                                                                                                   |
|------------------|--------------|-------------------------------------------|-------------------------------------------|-------------------------------------------|------------------------------------------------------------------------------------------------------------------------------------------|-----------------------------------------------------|-------------------------------------------------------------------------------------------------------------------------------------------------------------------|
| Desulfobacterota | organic      | 2.04 e <sup>8</sup> ± 5.97 e <sup>7</sup> | 7.89 e <sup>7</sup> ± 3.32 e <sup>7</sup> | 3.27 e <sup>7</sup> ± 1.25 e <sup>7</sup> | Kruskal Wallis: p=0.026;<br>Chi <sup>2</sup> =7.3<br><br>Pairwise Wilcox:<br>LCP-FCP: p=1.000<br>LCP-HCP: p=0.056<br>FCP-HCP: p=0.088    | Kruskal Wallis: p=0.286;<br>Chi <sup>2</sup> =3.8   | Pairwise Wilcox -<br>organic:<br><br>LCP-FCP: p=0.207<br>LCP- HCP: p=0.018<br>FCP-HCP: p=1.0                                                                      |
|                  | mineral      | 1.66 e <sup>7</sup> ± 8.41 e <sup>6</sup> | 4.26 e <sup>7</sup> ± 2.04 e <sup>7</sup> | 1.27 e <sup>7</sup> ± 2.44 e <sup>6</sup> |                                                                                                                                          |                                                     |                                                                                                                                                                   |
|                  | cryoturbated | -                                         | 8.31 e <sup>7</sup> ± 2.23 e <sup>7</sup> | 2.31 e <sup>7</sup> ± 7.15 e <sup>6</sup> |                                                                                                                                          |                                                     |                                                                                                                                                                   |
|                  | permafrost   | 1.41 e <sup>7</sup> ± 3.55 e <sup>6</sup> | 6.10 e <sup>7</sup> ± 1.16 e <sup>7</sup> | 2.05 e <sup>7</sup> ± 4.44 e <sup>6</sup> |                                                                                                                                          |                                                     |                                                                                                                                                                   |
| Euryarchaeota    | organic      | 8.11 e <sup>7</sup> ± 3.29 e <sup>7</sup> | 9.61 e <sup>6</sup> ± 6.85 e <sup>6</sup> | 3.00 e <sup>5</sup> ± 3.00 e <sup>5</sup> | Kruskal Wallis: p<0.0001;<br>Chi <sup>2</sup> =17.7<br><br>Pairwise Wilcox:<br>LCP-FCP: p=0.005<br>LCP-HCP: p<0.0001<br>FCP-HCP: p=0.972 | Kruskal Wallis: p=0.617;<br>Chi <sup>2</sup> =1.8   | Pairwise Wilcox<br>organic:<br><br>LCP-FCP: p=0.006<br>LCP-HCP: p<0.0001<br>FCP-HCP: p=0.853                                                                      |
|                  | mineral      | 3.52 e <sup>5</sup> ± 1.59 e <sup>4</sup> | 5.00 e <sup>5</sup> ± 2.66 e <sup>5</sup> | 1.17 e <sup>6</sup> ± 5.67 e <sup>5</sup> |                                                                                                                                          |                                                     |                                                                                                                                                                   |
|                  | cryoturbated | -                                         | 1.11 e <sup>6</sup> ± 5.09 e <sup>5</sup> | 1.29 e <sup>6</sup> ± 8.22 e <sup>5</sup> |                                                                                                                                          |                                                     |                                                                                                                                                                   |
|                  | permafrost   | 1.34 e <sup>6</sup> ± 4.72 e <sup>5</sup> | 3.29 e <sup>6</sup> ± 1.46 e <sup>6</sup> | 1.67 e <sup>6</sup> ± 1.27 e <sup>6</sup> |                                                                                                                                          |                                                     |                                                                                                                                                                   |
| Firmicutes       | organic      | 1.24 e <sup>7</sup> ± 2.45 e <sup>6</sup> | 6.97 e <sup>6</sup> ± 2.34 e <sup>6</sup> | 5.53 e <sup>6</sup> ± 1.43 e <sup>6</sup> | Kruskal Wallis: p=0.063;<br>Chi <sup>2</sup> =5.5                                                                                        | Kruskal Wallis: p<0.0001;<br>Chi <sup>2</sup> =22.5 | Pairwise Wilcox:<br>perm-org: p<0.0001<br>perm-min: p<0.0001<br>perm-cryo: p=0.067                                                                                |
|                  | mineral      | 4.91 e <sup>6</sup> ± 3.30 e <sup>6</sup> | 5.40 e <sup>6</sup> ± 2.42 e <sup>6</sup> | 1.70 e <sup>6</sup> ± 8.04 e <sup>5</sup> |                                                                                                                                          |                                                     |                                                                                                                                                                   |
|                  | cryoturbated | -                                         | 1.67 e <sup>7</sup> ± 7.69 e <sup>6</sup> | 5.08 e <sup>6</sup> ± 1.40 e <sup>6</sup> |                                                                                                                                          |                                                     |                                                                                                                                                                   |
|                  | permafrost   | 2.30 e <sup>7</sup> ± 5.37 e <sup>6</sup> | 3.69 e <sup>7</sup> ± 1.25 e <sup>7</sup> | 2.34 e <sup>7</sup> ± 6.21 e <sup>6</sup> |                                                                                                                                          |                                                     |                                                                                                                                                                   |
| Gemmatimonadota  | organic      | 4.74 e <sup>4</sup> ± 4.74 e <sup>4</sup> | 1.23 e <sup>7</sup> ± 3.55 e <sup>6</sup> | 2.96 e <sup>7</sup> ± 6.59 e <sup>6</sup> | Kruskal Wallis: p<0.0001;<br>Chi <sup>2</sup> =34.6<br><br>Pairwise Wilcox:<br>LCP-FCP: p<0.0001<br>LCP-HCP: p<0.0001<br>FCP-HCP: p=1.0  | Kruskal Wallis: p=0.013;<br>Chi <sup>2</sup> =10.7  | Pairwise Wilcox<br>permafrost:<br>LCP-FCP: p=0.02<br>LCP-HCP: p=0.22<br>FCP-HCP: p=0.25<br>organic:<br>LCP-FCP: p=0.0007<br>LCP-HCP: p=0.0003<br>FCP-HCP: p=0.227 |
|                  | mineral      | 4.73 e <sup>4</sup> ± 4.73 e <sup>4</sup> | 3.96 e <sup>6</sup> ± 1.14 e <sup>6</sup> | 8.22 e <sup>6</sup> ± 3.78 e <sup>6</sup> |                                                                                                                                          |                                                     |                                                                                                                                                                   |
|                  | cryoturbated | -                                         | 3.41 e <sup>7</sup> ± 2.3 e <sup>7</sup>  | 1.93 e <sup>7</sup> ± 4.71 e <sup>6</sup> |                                                                                                                                          |                                                     |                                                                                                                                                                   |
|                  | permafrost   | 0.00 ± 0.00                               | 1.39 e <sup>7</sup> ± 9.38 e <sup>6</sup> | 1.63 e <sup>6</sup> ± 9.88 e <sup>5</sup> |                                                                                                                                          |                                                     |                                                                                                                                                                   |
| Halobacterota    | organic      | 1.36 e <sup>7</sup> ± 2.57 e <sup>6</sup> | 9.75 e <sup>5</sup> ± 7.23 e <sup>5</sup> | 1.42 e <sup>5</sup> ± 1.42 e <sup>5</sup> | Kruskal Wallis: p<0.0001;<br>Chi <sup>2</sup> =20.5<br><br>Pairwise Wilcox:<br>LCP-FCP: p<0.0001<br>LCP-HCP: p<0.0001<br>FCP-HCP: p=1.0  | Kruskal Wallis: p=0.048;<br>Chi <sup>2</sup> =7.9   | Pairwise Wilcox<br>organic:<br><br>LCP-FCP: p<0.0001<br>LCP-HCP: p<0.0001<br>FCP-HCP: p=1.0                                                                       |
|                  | mineral      | 4.00 e <sup>6</sup> ± 1.52 e <sup>6</sup> | 1.89 e <sup>6</sup> ± 1.51 e <sup>6</sup> | 1.84 e <sup>6</sup> ± 1.42 e <sup>6</sup> |                                                                                                                                          |                                                     |                                                                                                                                                                   |
|                  | cryoturbated | -                                         | 5.29 e <sup>6</sup> ± 2.72 e <sup>6</sup> | 4.40 e <sup>6</sup> ± 1.18 e <sup>6</sup> |                                                                                                                                          |                                                     |                                                                                                                                                                   |
|                  | permafrost   | 4.22 e <sup>6</sup> ± 1.86 e <sup>6</sup> | 4.03 e <sup>6</sup> ± 1.80 e <sup>6</sup> | 5.09 e <sup>6</sup> ± 1.37 e <sup>6</sup> |                                                                                                                                          |                                                     |                                                                                                                                                                   |
| Latescibacterota | organic      | 8.54 e <sup>6</sup> ± 3.95 e <sup>6</sup> | 0.00 ± 0.00                               | 1.22 e <sup>6</sup> ± 9.36 e <sup>5</sup> |                                                                                                                                          |                                                     | LCP organic harbored<br>88 % of ddPCR-corr.                                                                                                                       |
|                  | mineral      | 3.07 e <sup>5</sup> ± 3.07 e <sup>5</sup> | 5.50 e <sup>4</sup> ± 3.81 e <sup>4</sup> | 0.00 ± 0.00                               |                                                                                                                                          |                                                     |                                                                                                                                                                   |

|                   |              |                                           |                                           |                                           |                                                                                                                                          |                                                                                                                                            |                                                                                                                      |
|-------------------|--------------|-------------------------------------------|-------------------------------------------|-------------------------------------------|------------------------------------------------------------------------------------------------------------------------------------------|--------------------------------------------------------------------------------------------------------------------------------------------|----------------------------------------------------------------------------------------------------------------------|
|                   | cryoturbated | -                                         | 0.00 ± 0.00                               | 0.00 ± 0.00                               |                                                                                                                                          |                                                                                                                                            | reads assigned to this phylum                                                                                        |
|                   | permafrost   | 1.10 e <sup>4</sup> ± 1.10 e <sup>4</sup> | 0.00 ± 0.00                               | 0.00 ± 0.00                               |                                                                                                                                          |                                                                                                                                            |                                                                                                                      |
| Methylomirabilota | organic      | 4.04 e <sup>6</sup> ± 8.17 e <sup>5</sup> | 2.12 e <sup>6</sup> ± 1.71 e <sup>6</sup> | 3.24 e <sup>5</sup> ± 3.24 e <sup>5</sup> | Kruskal Wallis: p=0.708;<br>Chi <sup>2</sup> =0.7                                                                                        | Kruskal Wallis: p=0.016;<br>Chi <sup>2</sup> =8.3<br><br>The permafrost layer harbored < 1 % of ddPCR-corr. reads assigned to this phylum. | LCP organic harbored 60 % of ddPCR-corr. reads assigned to this phylum                                               |
|                   | mineral      | 2.10 e <sup>5</sup> ± 1.58 e <sup>5</sup> | 2.13 e <sup>5</sup> ± 1.54 e <sup>5</sup> | 1.24 e <sup>5</sup> ± 8.18 e <sup>4</sup> |                                                                                                                                          |                                                                                                                                            |                                                                                                                      |
|                   | cryoturbated | -                                         | 0.00 ± 0.00                               | 0.00 ± 0.00                               |                                                                                                                                          |                                                                                                                                            |                                                                                                                      |
|                   | permafrost   | 1.18 e <sup>5</sup> ± 7.52 e <sup>4</sup> | 0.00 ± 0.00                               | 0.00 ± 0.00                               |                                                                                                                                          |                                                                                                                                            |                                                                                                                      |
| Micrarchaeota     | organic      | 2.57 e <sup>6</sup> ± 9.44 e <sup>5</sup> | 1.17 e <sup>6</sup> ± 1.17 e <sup>6</sup> | 0.00 ± 0.00                               |                                                                                                                                          |                                                                                                                                            | LCP organic harbored 69 % of ddPCR-corr. reads assigned to this phylum                                               |
|                   | mineral      | 0.00 ± 0.00                               | 0.00 ± 0.00                               | 0.00 ± 0.00                               |                                                                                                                                          |                                                                                                                                            |                                                                                                                      |
|                   | cryoturbated | -                                         | 0.00 ± 0.00                               | 0.00 ± 0.00                               |                                                                                                                                          |                                                                                                                                            |                                                                                                                      |
|                   | permafrost   | 0.00 ± 0.00                               | 0.00 ± 0.00                               | 0.00 ± 0.00                               |                                                                                                                                          |                                                                                                                                            |                                                                                                                      |
| Myxococcota       | organic      | 9.63 e <sup>6</sup> ± 6.20 e <sup>6</sup> | 2.71 e <sup>7</sup> ± 7.93 e <sup>6</sup> | 3.59 e <sup>7</sup> ± 5.74 e <sup>6</sup> | Kruskal Wallis: p=0.106;<br>Chi <sup>2</sup> =4.5                                                                                        | Kruskal Wallis: p<0.0001;<br>Chi <sup>2</sup> =41.4<br><br>org-perm<br>in LCP: p=0.047<br>in FCP: p=0.008<br>in HCP: p=0.005               | Pairwise Wilcox organic:<br><br>LCP-FCP: p=0.104<br>LCP-HCP: p=0.007<br>FCP-HCP: p=0.765                             |
|                   | mineral      | 1.91 e <sup>5</sup> ± 5.44 e <sup>4</sup> | 1.25 e <sup>5</sup> ± 1.11 e <sup>5</sup> | 1.58 e <sup>6</sup> ± 6.00 e <sup>5</sup> |                                                                                                                                          |                                                                                                                                            |                                                                                                                      |
|                   | cryoturbated | -                                         | 1.68 e <sup>6</sup> ± 8.45 e <sup>5</sup> | 2.83 e <sup>6</sup> ± 7.48 e <sup>5</sup> |                                                                                                                                          |                                                                                                                                            |                                                                                                                      |
|                   | permafrost   | 0.00 ± 0.00                               | 6.73 e <sup>5</sup> ± 6.73 e <sup>5</sup> | 0.00 ± 0.00                               |                                                                                                                                          |                                                                                                                                            |                                                                                                                      |
| Nanoarchaeota     | organic      | 4.56 e <sup>7</sup> ± 1.47 e <sup>7</sup> | 3.03 e <sup>7</sup> ± 1.34 e <sup>7</sup> | 6.63 e <sup>5</sup> ± 4.58 e <sup>5</sup> | Kruskal Wallis: p<0.0001;<br>Chi <sup>2</sup> =21.3<br><br>Pairwise Wilcox:<br>LCP-FCP: p=0.220<br>LCP-HCP: p<0.0001<br>FCP-HCP: p=0.001 | Kruskal Wallis: p=0.369;<br>Chi <sup>2</sup> =3.2                                                                                          | LCP organic harbored 48 % of ddPCR-corr. reads assigned to this phylum.                                              |
|                   | mineral      | 1.93 e <sup>6</sup> ± 1.87 e <sup>6</sup> | 1.83 e <sup>6</sup> ± 1.09 e <sup>6</sup> | 5.80 e <sup>5</sup> ± 3.89 e <sup>5</sup> |                                                                                                                                          |                                                                                                                                            |                                                                                                                      |
|                   | cryoturbated | -                                         | 1.87 e <sup>7</sup> ± 8.03 e <sup>6</sup> | 8.24 e <sup>5</sup> ± 6.60 e <sup>5</sup> |                                                                                                                                          |                                                                                                                                            |                                                                                                                      |
|                   | permafrost   | 1.85 e <sup>6</sup> ± 7.68 e <sup>5</sup> | 1.26 e <sup>7</sup> ± 8.25 e <sup>6</sup> | 4.87 e <sup>5</sup> ± 2.10 e <sup>5</sup> |                                                                                                                                          |                                                                                                                                            |                                                                                                                      |
| Patescibacteria   | organic      | 4.81 e <sup>7</sup> ± 1.00 e <sup>7</sup> | 2.55 e <sup>7</sup> ± 9.85 e <sup>6</sup> | 1.15 e <sup>7</sup> ± 3.84 e <sup>6</sup> | LME: p=0.175; F=1.9                                                                                                                      | LME: p=0.001; F=5.9                                                                                                                        | LME: p=0.014; F=3.2<br><br>Emmeans pairwise organic:<br><br>LCP-FCP: p=0.211<br>LCP-HCP: p=0.009<br>FCP-HCP: p=0.320 |
|                   | mineral      | 4.46 e <sup>6</sup> ± 6.95 e <sup>5</sup> | 1.52 e <sup>7</sup> ± 8.10 e <sup>6</sup> | 1.71 e <sup>7</sup> ± 1.03 e <sup>7</sup> |                                                                                                                                          |                                                                                                                                            |                                                                                                                      |
|                   | cryoturbated | -                                         | 7.14 e <sup>7</sup> ± 2.35 e <sup>7</sup> | 4.54 e <sup>7</sup> ± 1.22 e <sup>7</sup> |                                                                                                                                          |                                                                                                                                            |                                                                                                                      |
|                   | permafrost   | 1.17 e <sup>7</sup> ± 5.39 e <sup>6</sup> | 5.00 e <sup>7</sup> ± 1.01 e <sup>7</sup> | 1.52 e <sup>7</sup> ± 3.66 e <sup>6</sup> |                                                                                                                                          |                                                                                                                                            |                                                                                                                      |

|                 |              |                                           |                                           |                                           |                                                                                                                                      |                                                                                                                                            |                                                                                           |
|-----------------|--------------|-------------------------------------------|-------------------------------------------|-------------------------------------------|--------------------------------------------------------------------------------------------------------------------------------------|--------------------------------------------------------------------------------------------------------------------------------------------|-------------------------------------------------------------------------------------------|
| Planctomycetota | organic      | 1.53 e <sup>7</sup> ± 5.40 e <sup>6</sup> | 5.21 e <sup>7</sup> ± 1.69 e <sup>7</sup> | 5.15 e <sup>7</sup> ± 8.91 e <sup>6</sup> | Kruskal Wallis: p=0.181;<br>Chi <sup>2</sup> =3.4                                                                                    | Kruskal Wallis: p<0.0001;<br>Chi <sup>2</sup> =41.1                                                                                        | Pairwise Wilcoxon -<br>organic:<br>LCP-FCP: p=0.235<br>LCP-HCP: p=0.005<br>FCP-HCP: p=1.0 |
|                 | mineral      | 0.00 ± 0.00                               | 1.49 e <sup>6</sup> ± 5.60 e <sup>5</sup> | 2.47 e <sup>6</sup> ± 1.21 e <sup>6</sup> |                                                                                                                                      |                                                                                                                                            |                                                                                           |
|                 | cryoturbated | -                                         | 4.92 e <sup>6</sup> ± 2.93 e <sup>6</sup> | 4.63 e <sup>6</sup> ± 1.92 e <sup>6</sup> |                                                                                                                                      |                                                                                                                                            |                                                                                           |
|                 | permafrost   | 1.32 e <sup>5</sup> ± 1.07 e <sup>5</sup> | 1.65 e <sup>6</sup> ± 8.07 e <sup>5</sup> | 1.06 e <sup>6</sup> ± 9.46 e <sup>5</sup> |                                                                                                                                      |                                                                                                                                            |                                                                                           |
| Proteobacteria  | organic      | 2.45 e <sup>8</sup> ± 7.11 e <sup>7</sup> | 7.06 e <sup>8</sup> ± 1.40 e <sup>8</sup> | 8.26 e <sup>8</sup> ± 1.77 e <sup>8</sup> | Kruskal Wallis: p=0.008;<br>Chi <sup>2</sup> =9.6<br><br>Pairwise Wilcoxon:<br>LCP-FCP: p=0.05<br>LCP-HCP: p=0.008<br>FCP-HCP: p=1.0 | Kruskal Wallis: p<0.0001;<br>Chi <sup>2</sup> =23.7<br><br>Pairwise Wilcoxon:<br>org-min: p<0.0001<br>org-cryo: p=1.0<br>org-perm: p=0.015 |                                                                                           |
|                 | mineral      | 7.07 e <sup>6</sup> ± 2.06 e <sup>5</sup> | 6.16 e <sup>7</sup> ± 2.44 e <sup>7</sup> | 1.42 e <sup>8</sup> ± 3.47 e <sup>7</sup> |                                                                                                                                      |                                                                                                                                            |                                                                                           |
|                 | cryoturbated | -                                         | 4.89 e <sup>8</sup> ± 3.21 e <sup>8</sup> | 4.29 e <sup>8</sup> ± 9.87 e <sup>7</sup> |                                                                                                                                      |                                                                                                                                            |                                                                                           |
|                 | permafrost   | 9.90 e <sup>7</sup> ± 4.57 e <sup>7</sup> | 3.27 e <sup>8</sup> ± 9.45 e <sup>7</sup> | 2.18 e <sup>8</sup> ± 9.26 e <sup>7</sup> |                                                                                                                                      |                                                                                                                                            |                                                                                           |
| RCP2-54         | organic      | 3.19 e <sup>5</sup> ± 3.19 e <sup>5</sup> | 7.00 e <sup>6</sup> ± 2.40 e <sup>6</sup> | 2.23 e <sup>6</sup> ± 7.31 e <sup>5</sup> | LCPs harbored 2.5 % of<br>ddPCR-corr. reads<br>assigned to this phylum.                                                              |                                                                                                                                            |                                                                                           |
|                 | mineral      | 0.00 ± 0.00                               | 7.81 e <sup>5</sup> ± 4.02 e <sup>5</sup> | 2.61 e <sup>6</sup> ± 1.61 e <sup>6</sup> |                                                                                                                                      |                                                                                                                                            |                                                                                           |
|                 | cryoturbated | -                                         | 8.30 e <sup>5</sup> ± 7.02 e <sup>5</sup> | 2.13 e <sup>6</sup> ± 1.40 e <sup>6</sup> |                                                                                                                                      |                                                                                                                                            |                                                                                           |
|                 | permafrost   | 0.00 ± 0.00                               | 0.00 ± 0.00                               | 4.32 e <sup>5</sup> ± 3.82 e <sup>5</sup> |                                                                                                                                      |                                                                                                                                            |                                                                                           |
| Sva0485         | organic      | 6.91 e <sup>6</sup> ± 2.49 e <sup>6</sup> | 0.00 ± 0.00                               | 0.00 ± 0.00                               |                                                                                                                                      |                                                                                                                                            | LCP organic harbored<br>99.6 % of ddPCR-<br>corr. reads assigned<br>to this phylum        |
|                 | mineral      | 1.84 e <sup>5</sup> ± 1.84 e <sup>5</sup> | 0.00 ± 0.00                               | 0.00 ± 0.00                               |                                                                                                                                      |                                                                                                                                            |                                                                                           |
|                 | cryoturbated | -                                         | 0.00 ± 0.00                               | 0.00 ± 0.00                               |                                                                                                                                      |                                                                                                                                            |                                                                                           |
|                 | permafrost   | 0.00 ± 0.00                               | 0.00 ± 0.00                               | 0.00 ± 0.00                               |                                                                                                                                      |                                                                                                                                            |                                                                                           |
| TA06            | organic      | 1.81 e <sup>6</sup> ± 5.15 e <sup>5</sup> | 0.00 ± 0.00                               | 0.00 ± 0.00                               |                                                                                                                                      |                                                                                                                                            | LCP organic harbored<br>97 % of ddPCR-corr.<br>reads assigned to this<br>phylum           |
|                 | mineral      | 3.68 e <sup>5</sup> ± 3.68 e <sup>5</sup> | 0.00 ± 0.00                               | 0.00 ± 0.00                               |                                                                                                                                      |                                                                                                                                            |                                                                                           |
|                 | cryoturbated | -                                         | 0.00 ± 0.00                               | 0.00 ± 0.00                               |                                                                                                                                      |                                                                                                                                            |                                                                                           |
|                 | permafrost   | 0.00 ± 0.00                               | 0.00 ± 0.00                               | 0.00 ± 0.00                               |                                                                                                                                      |                                                                                                                                            |                                                                                           |
|                 | organic      | 7.58 e <sup>6</sup> ± 5.74 e <sup>6</sup> | 1.45 e <sup>6</sup> ± 7.18 e <sup>5</sup> | 4.23 e <sup>5</sup> ± 4.23 e <sup>5</sup> | Kruskal Wallis: p=0.131;<br>Chi <sup>2</sup> =4.1                                                                                    | Kruskal Wallis: p<0.0001;<br>Chi <sup>2</sup> =23.0                                                                                        |                                                                                           |
|                 | mineral      | 2.55 e <sup>6</sup> ± 1.99 e <sup>6</sup> | 1.89 e <sup>6</sup> ± 1.02 e <sup>6</sup> | 1.09 e <sup>6</sup> ± 4.20 e <sup>5</sup> |                                                                                                                                      |                                                                                                                                            |                                                                                           |

|                              |              |                                           |                                           |                                           |                                                                                                                                   |                                                                                                                                          |
|------------------------------|--------------|-------------------------------------------|-------------------------------------------|-------------------------------------------|-----------------------------------------------------------------------------------------------------------------------------------|------------------------------------------------------------------------------------------------------------------------------------------|
| Unknown Taxa on Phylum level | cryoturbated | -                                         | 1.18 e <sup>7</sup> ± 3.97 e <sup>6</sup> | 2.03 e <sup>6</sup> ± 7.93 e <sup>5</sup> |                                                                                                                                   | The permafrost layer harbored 43 % of ddPCR-corr. reads assigned to this phylum.                                                         |
|                              | permafrost   | 4.17 e <sup>6</sup> ± 1.40 e <sup>6</sup> | 1.46 e <sup>7</sup> ± 5.94 e <sup>6</sup> | 4.90 e <sup>6</sup> ± 2.12 e <sup>6</sup> |                                                                                                                                   |                                                                                                                                          |
| Verrucomicrobiota            | organic      | 1.61 e <sup>8</sup> ± 4.78 e <sup>7</sup> | 8.19 e <sup>8</sup> ± 1.35 e <sup>8</sup> | 8.99 e <sup>8</sup> ± 1.15 e <sup>8</sup> | Kruskal Wallis: p=0.0150; Chi <sup>2</sup> =8.4<br><br>Pairwise Wilcox:<br>LCP-FCP: p=0.035<br>LCP-HCP: p=0.027<br>FCP-HCP: p=1.0 | Kruskal Wallis: p<0.0001; Chi <sup>2</sup> =40.0<br><br>Pairwise Wilcox:<br>org-min: p<0.0001<br>org-cryo:p=0.087<br>org-perm: p=<0.0001 |
|                              | mineral      | 2.94 e <sup>7</sup> ± 5.19 e <sup>6</sup> | 4.11 e <sup>7</sup> ± 1.07 e <sup>7</sup> | 7.80e <sup>7</sup> ± 2.48 e <sup>7</sup>  |                                                                                                                                   |                                                                                                                                          |
|                              | cryoturbated | -                                         | 2.35 e <sup>8</sup> ± 1.54 e <sup>8</sup> | 1.91 e <sup>8</sup> ± 3.53 e <sup>7</sup> |                                                                                                                                   |                                                                                                                                          |
|                              | permafrost   | 1.14 e <sup>7</sup> ± 5.77 e <sup>6</sup> | 1.04 e <sup>8</sup> ± 4.74 e <sup>7</sup> | 2.45 e <sup>7</sup> ± 1.10 e <sup>7</sup> |                                                                                                                                   |                                                                                                                                          |
| WPS-2                        | organic      | 5.56 e <sup>5</sup> ± 4.10 e <sup>5</sup> | 3.67 e <sup>6</sup> ± 1.80 e <sup>6</sup> | 4.04 e <sup>6</sup> ± 2.36 e <sup>6</sup> | LCPs harbored 6.4 % of ddPCR-corr. reads assigned to this phylum.                                                                 |                                                                                                                                          |
|                              | mineral      | 0.00 ± 0.00                               | 4.11 e <sup>5</sup> ± 2.52 e <sup>5</sup> | 0.00 ± 0.00                               |                                                                                                                                   |                                                                                                                                          |
|                              | cryoturbated | -                                         | 5.41 e <sup>5</sup> ± 5.41 e <sup>5</sup> | 5.84 e <sup>5</sup> ± 3.89 e <sup>5</sup> |                                                                                                                                   |                                                                                                                                          |
|                              | permafrost   | 0.00 ± 0.00                               | 0.00 ± 0.00                               | 0.00 ± 0.00                               |                                                                                                                                   |                                                                                                                                          |

*Presented are means ± SE (LCP\_organic: n = 12, FCP\_organic: n = 12, HCP\_organic: n = 11, LCP\_mineral: n = 2, FCP\_mineral: n = 6, HCP\_mineral: n = 6, FCP\_cryoturbated: n = 5, HCP\_cryoturbated: n = 6, LCP\_permafrost: n = 6, FCP\_permafrost: n = 7, HCP\_permafrost: n = 6). Effects of polygon type, soil layer category, and their interaction were tested using linear mixed-effects models (Type III ANOVA), followed by Tukey-adjusted estimated marginal means for pairwise comparisons. When assumptions were not met, Kruskal–Wallis tests were performed, followed by Bonferroni-adjusted pairwise Wilcoxon tests for pairwise comparisons. For space saving reasons, the presented statistics refer mainly to the observations discussed in the main text. If phylum abundance estimates were too imbalanced for statistical testing, descriptive abundance information is stated instead. Abbreviations: HCPs = high-centered-, FCPs = flat-centered-, LCPs = low-centered polygons.*

organic mineral cryoturbated permafrost

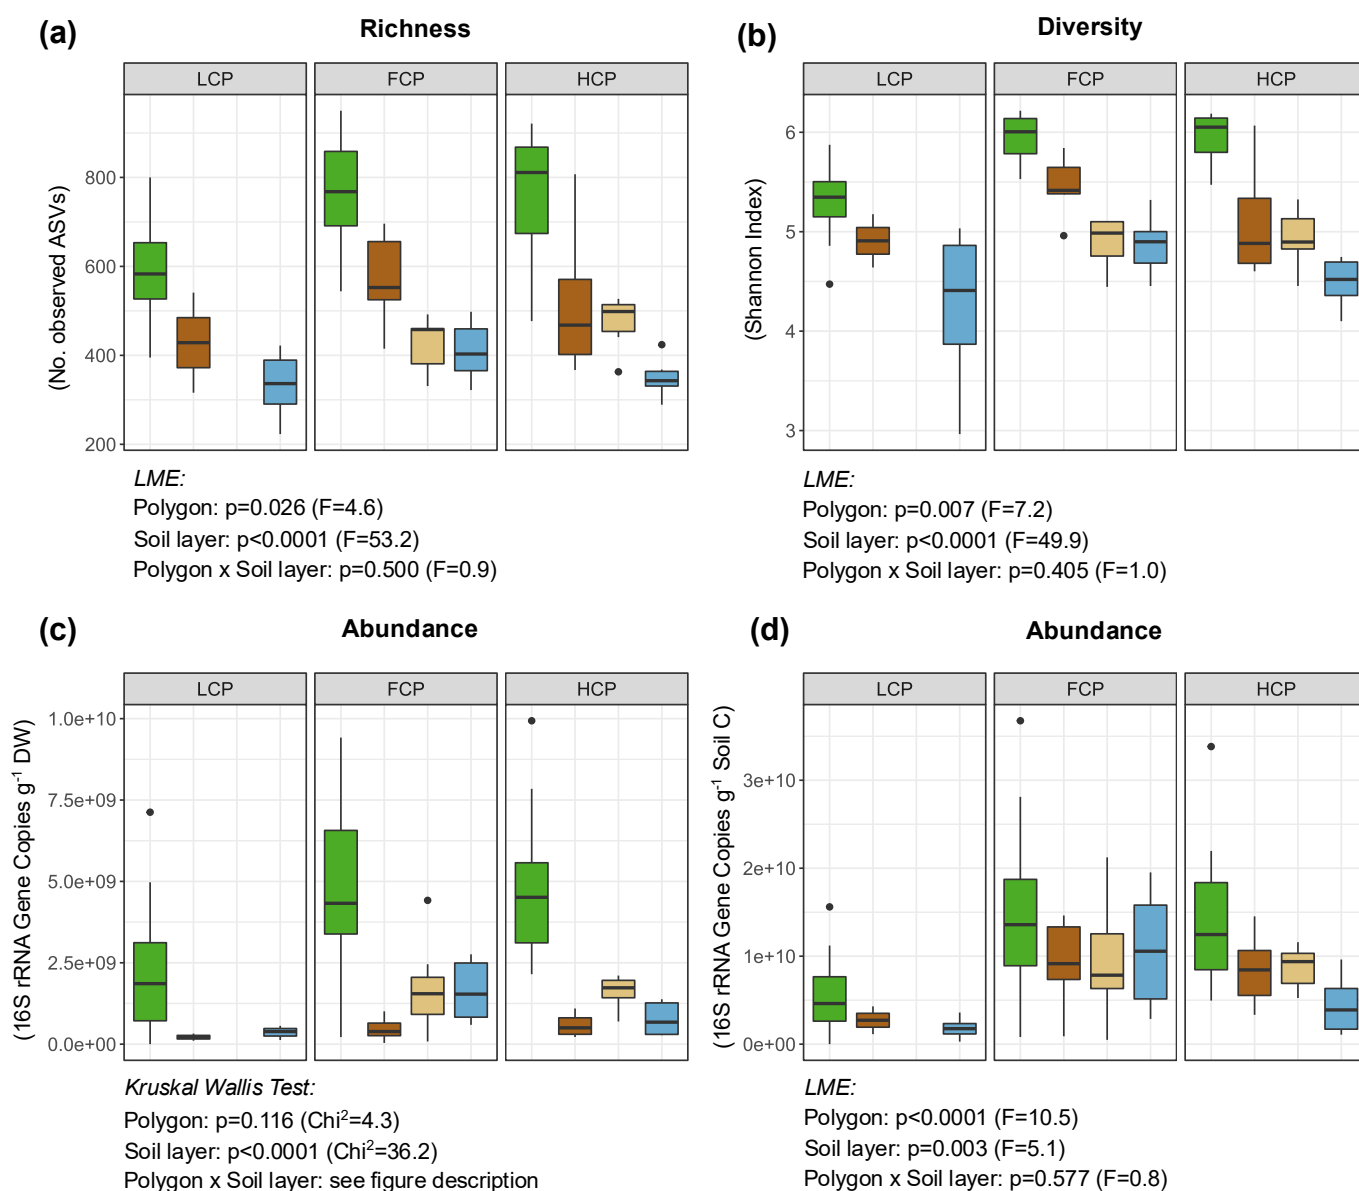

**Figure S5.** Bacterial and archaeal richness, diversity, and abundance estimates across soil layers and ice-wedge polygon types. Panels show (a) richness (number of observed ASVs), (b) diversity (Shannon index), (c) abundance proxy (16S rRNA gene copies  $g^{-1}$  DW soil), and (d) abundance normalized to soil carbon content (16S rRNA gene copies  $g^{-1}$  soil C). Sample sizes: LCP\_organic:  $n = 12$ , FCP\_organic:  $n = 12$ , HCP\_organic:  $n = 11$ ; LCP\_mineral:  $n = 2$ , FCP\_mineral:  $n = 6$ , HCP\_mineral:  $n = 6$ ; FCP\_cryoturbated:  $n = 7$ , HCP\_cryoturbated:  $n = 6$ ; LCP\_permafrost:  $n = 6$ , FCP\_permafrost:  $n = 7$ , HCP\_permafrost:  $n = 6$ . Effects of polygon type and soil layer are indicated below the respective panels (linear mixed-effects models, ANOVA type III, or Kruskal Wallis tests). Pairwise comparisons were performed using Tukey-adjusted estimated marginal means or Bonferroni-adjusted pairwise Wilcoxon tests.

**Interactive effect:** (c) Bacterial and archaeal abundance (16S rRNA gene copies  $g^{-1}$  DW) was lower in the organic layer of LCPs compared to FCPs and HCPs (Kruskal Wallis:  $p = 0.019$ ,  $Chi^2 =$

7.92; pairwise Wilcoxon: LCP vs. FCP:  $p = 0.079$ , LCP vs. HCP:  $p = 0.032$ ). In the permafrost layer, bacterial and archaeal abundance was also significantly lower in LCPs than FCPs (Kruskal Wallis  $p = 0.011$ ,  $\text{Chi}^2 = 8.94$ ; pairwise Wilcoxon: LCP vs. FCP:  $p = 0.010$ ).

Bacterial and archaeal abundance (16S rRNA gene copies  $\text{g}^{-1}$  DW) varied across soil layers in all polygon types (Kruskal Wallis: LCP:  $p = 0.015$ ,  $\text{Chi}^2 = 8.42$ ; FCP:  $p = 0.001$ ,  $\text{Chi}^2 = 15.59$ ; HCP:  $p < 0.0001$   $\text{Chi}^2 = 23.07$ ). In all polygon types, the organic layer harbored higher abundances than the permafrost layer (pairwise Wilcoxon: LCP:  $p = 0.039$ ; FCP:  $p = 0.060$ ; HCP:  $p = 0.007$ ). In FCPs and HCPs, the organic layer additionally showed significantly higher abundances than the mineral layer (FCP:  $p = 0.026$ ; HCP:  $p = 0.007$ ). Abbreviations: HCPs = high-centered-, FCPs = flat-centered-, LCPs = low-centered polygons.

(a)

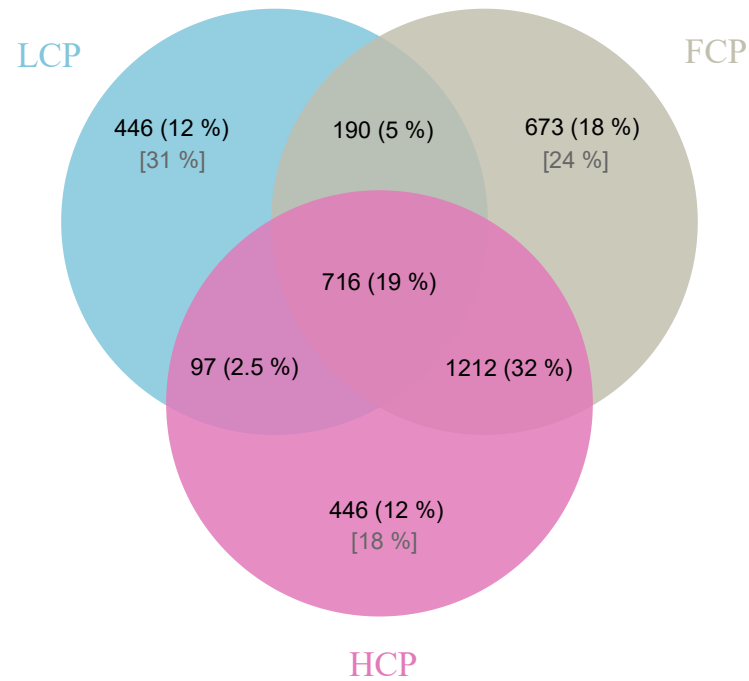

(b)

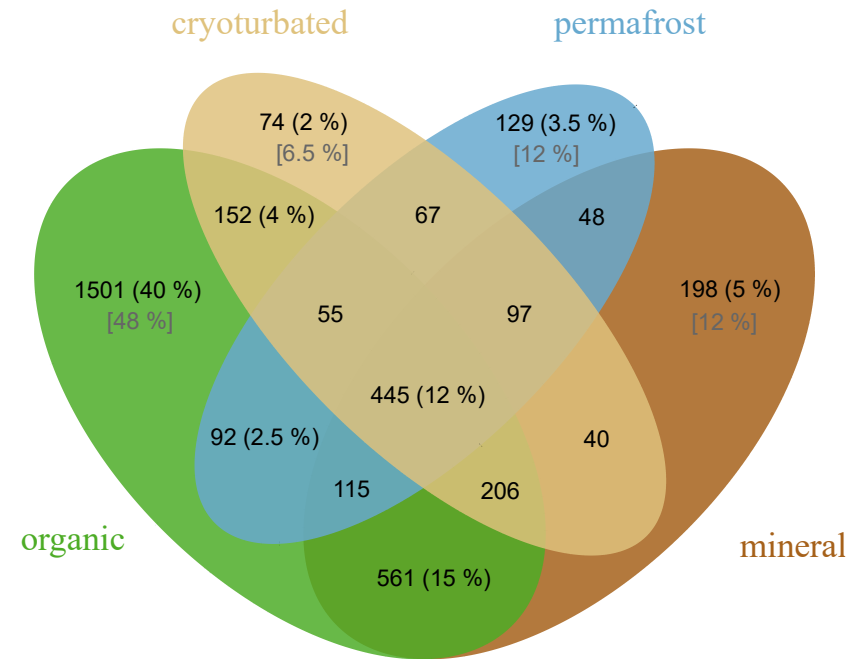

186

**Figure S6.** Venn Diagram depicting the number of shared and unique bacterial and archaeal ASVs among (a) ice-wedge polygon types (low-centered polygon, LCP,  $n = 19$ ; flat-centered polygon, FCP  $n = 30$ ; high-centered polygon, HCP = 29) and (b) soil layers (organic topsoil = 35; mineral subsoil = 14; cryoturbated material = 11; permafrost = 19). Fractions of the shared and unique taxa relative to the total number of ASVs ( $n = 3780$ ) are shown as percentages (%; black). The proportion of polygon-specific or soil layer-specific ASVs relative to the number of ASVs within each polygon type or soil layer are given in [%; grey].

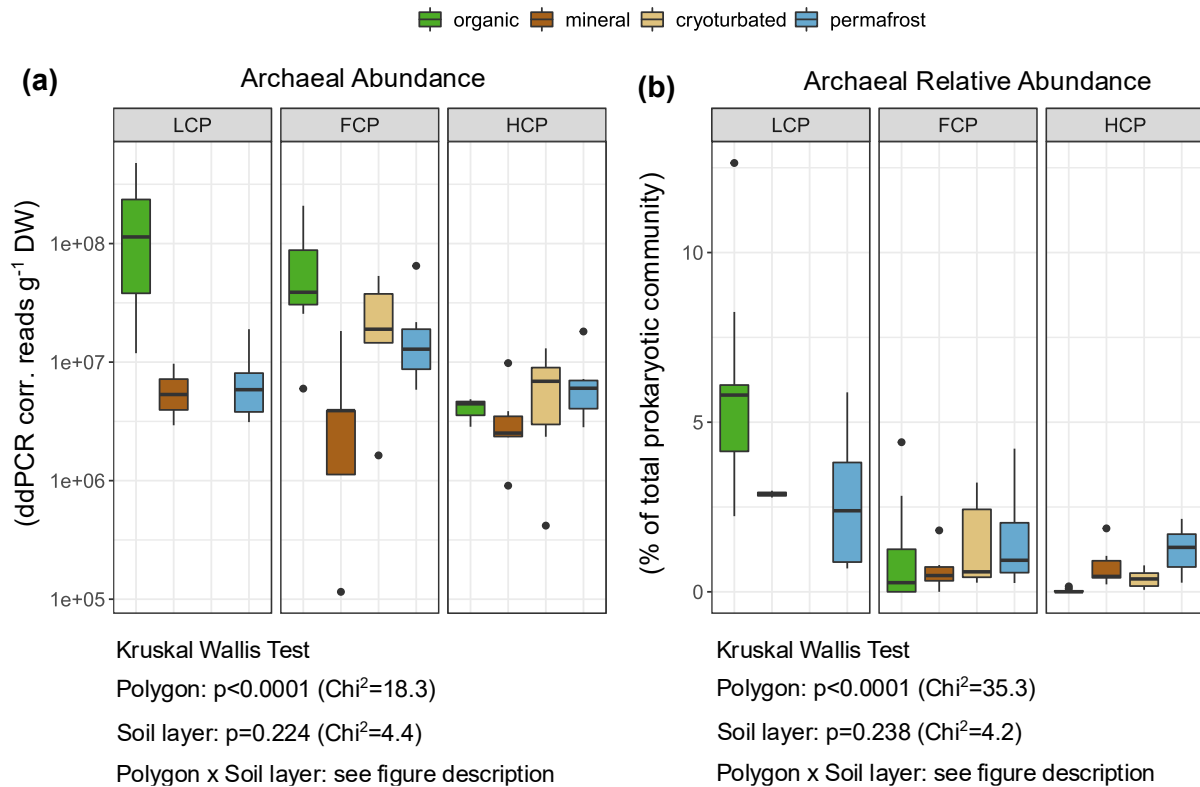

187

188

**Figure S7.** Archaeal abundance across soil layers and ice-wedge polygon types. Panel (a) shows ddPCR-informed abundance estimates (gene copy number corrected reads  $g^{-1}$  DW). Panel (b) shows relative abundances (contribution of archaeal ddPCR-corrected reads to the total prokaryotic community, %). Sample sizes: LCP\_organic:  $n = 12$ , FCP\_organic:  $n = 12$ , HCP\_organic:  $n = 11$ ; LCP\_mineral:  $n = 2$ , FCP\_mineral:  $n = 6$ , HCP\_mineral:  $n = 6$ ; FCP\_cryoturbated:  $n = 5$ , HCP\_cryoturbated:  $n = 6$ ; LCP\_permafrost:  $n = 6$ , FCP\_permafrost:  $n = 7$ , HCP\_permafrost:  $n = 6$ . Archaeal abundance (a) is shown on a logarithmic scale for improved readability.

**Interactive effects: (a) Archaeal abundance (gene copy number–corrected reads  $g^{-1}$  DW)** was lower in HCP soils compared to LCP and FCP soils (HCP vs. LCP:  $p < 0.0001$ ; HCP vs. FCP:  $p = 0.002$ ). Within LCPs, archaeal abundance was notably higher in the organic layer than in the permafrost layer ( $p = 0.030$ ), whereas no difference between layers were observed in FCPs. In HCPs, archaeal abundance in the organic layer was minimal and lower than in the cryoturbated ( $p = 0.030$ ) and permafrost layers ( $p = 0.021$ ). **(b) Archaeal relative abundance (%)** was higher in LCP soils compared to FCP and HCP soils (LCP vs. FCP:  $p < 0.0001$ ; LCP vs. HCP:  $p < 0.0001$ ), particularly in the organic layer (LCP vs. FCP:  $p = 0.0004$ ; LCP vs. HCP:  $p = 0.0001$ ). Within LCPs, relative abundance in the organic layer exceeded that in the permafrost layer ( $p = 0.039$ ), whereas no differences were observed in FCPs. In HCPs, relative abundance in the organic layer was lower than in all other layers (organic vs. mineral:  $p = 0.003$ ; organic vs. cryoturbated:  $p = 0.012$ ; organic vs. permafrost:  $p = 0.003$ ). Abbreviations: HCPs = high-centered-, FCPs = flat-centered-, LCPs = low-centered polygons.

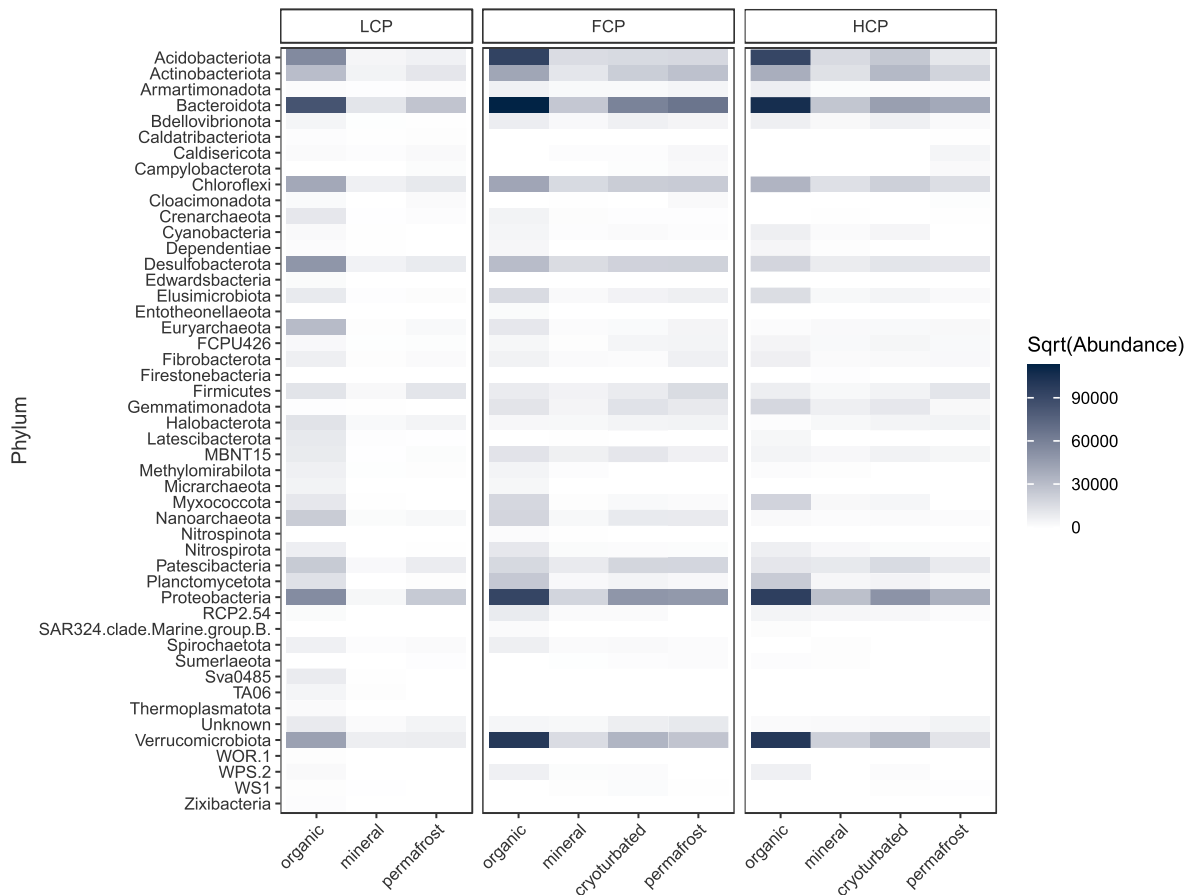

**Figure S8.** Heatmap showing ddPCR-informed abundance estimates (gene copy number corrected reads  $g^{-1}$  DW soil) of bacterial and archaeal phyla across ice-wedge polygon types and soil layers (LCP\_organic:  $n = 12$ , FCP\_organic:  $n = 12$ , HCP\_organic:  $n = 11$ , LCP\_mineral:  $n = 2$ , FCP\_mineral:  $n = 6$ , HCP\_mineral:  $n = 6$ , FCP\_cryoturbated:  $n = 7$ , HCP\_cryoturbated:  $n = 6$ , LCP\_permafrost:  $n = 6$ , FCP\_permafrost:  $n = 7$ , HCP\_permafrost:  $n = 6$ ). Abundance estimates were square-root-transformed for improved visualization. “Unknown” denotes taxa that could not be assigned at the phylum level. Abbreviations: HCPs = high-centered-, FCPs = flat-centered-, LCPs = low-centered polygons.

189 S4.2. Fungal communities

**Table S7.** ddPCR-informed abundance estimates (gene copy number corrected reads  $g^{-1}$  DW soil) of fungal phyla across soil layers per polygon type.

|                 | Soil layer   | LCP                                     | FCP                                     | HCP                                     | Polygon effect                                                                                                                      | Soil layer effect                                                                                                                                                                                    | Interactive effect                                                                           |
|-----------------|--------------|-----------------------------------------|-----------------------------------------|-----------------------------------------|-------------------------------------------------------------------------------------------------------------------------------------|------------------------------------------------------------------------------------------------------------------------------------------------------------------------------------------------------|----------------------------------------------------------------------------------------------|
| Ascomycota      | organic      | $1.04 \times 10^7 \pm 3.18 \times 10^6$ | $6.61 \times 10^7 \pm 2.18 \times 10^7$ | $8.70 \times 10^7 \pm 2.44 \times 10^7$ | Kruskal Wallis:<br>p=0.361; Chi <sup>2</sup> =2.0                                                                                   | Kruskal Wallis:<br>p<0.0001; Chi <sup>2</sup> =40.3<br>The organic layer harbored 96.7 % of ddPCR-corr. reads assigned to this phylum.<br>org-min:p<0.0001<br>org-cryo:p<0.0004<br>org-perm:p<0.0001 | Pairwise Wilcox<br>organic:<br><br>LCP-FCP: p=0.015<br>LCP-HCP: p=0.0004<br>FCP-HCP: p=0.844 |
|                 | mineral      | $3.45 \times 10^5 \pm 3.11 \times 10^5$ | $7.37 \times 10^5 \pm 4.23 \times 10^5$ | $1.63 \times 10^6 \pm 1.08 \times 10^6$ |                                                                                                                                     |                                                                                                                                                                                                      |                                                                                              |
|                 | cryoturbated | -                                       | $7.81 \times 10^5 \pm 3.61 \times 10^5$ | $2.56 \times 10^6 \pm 5.03 \times 10^5$ |                                                                                                                                     |                                                                                                                                                                                                      |                                                                                              |
|                 | permafrost   | $6.18 \times 10^5 \pm 3.10 \times 10^5$ | $4.07 \times 10^6 \pm 2.03 \times 10^6$ | $3.34 \times 10^5 \pm 2.16 \times 10^5$ |                                                                                                                                     |                                                                                                                                                                                                      |                                                                                              |
| Basidiomycota   | organic      | $3.32 \times 10^5 \pm 2.77 \times 10^5$ | $2.00 \times 10^7 \pm 6.36 \times 10^6$ | $3.16 \times 10^7 \pm 1.46 \times 10^7$ | Kruskal Wallis: p=0.023;<br>Chi <sup>2</sup> =7.5<br><br>Pairwise Wilcox:<br>LCP-FCP: p=0.049<br>LCP-HCP: p=0.055<br>FCP-HCP: p=1.0 | Kruskal Wallis:<br>p<0.0001; Chi <sup>2</sup> =29.5<br>The organic layer harbored 99 % of ddPCR-corr. reads assigned to this phylum.                                                                 | LCP organic harbored < 1% of ddPCR-corr. reads assigned to this phylum.                      |
|                 | mineral      | $1.02 \times 10^3 \pm 1.02 \times 10^3$ | $8.50 \times 10^4 \pm 5.86 \times 10^4$ | $2.54 \times 10^5 \pm 2.39 \times 10^5$ |                                                                                                                                     |                                                                                                                                                                                                      |                                                                                              |
|                 | cryoturbated | -                                       | $3.68 \times 10^4 \pm 2.64 \times 10^4$ | $4.78 \times 10^5 \pm 4.60 \times 10^5$ |                                                                                                                                     |                                                                                                                                                                                                      |                                                                                              |
|                 | permafrost   | $5.86 \times 10^3 \pm 4.65 \times 10^3$ | $2.23 \times 10^4 \pm 1.02 \times 10^4$ | $1.33 \times 10^4 \pm 1.21 \times 10^4$ |                                                                                                                                     |                                                                                                                                                                                                      |                                                                                              |
| Chytridiomycota | organic      | $3.97 \times 10^3 \pm 3.33 \times 10^3$ | $1.35 \times 10^6 \pm 7.79 \times 10^5$ | $5.27 \times 10^6 \pm 3.16 \times 10^6$ | Kruskal Wallis: p=0.047;<br>Chi <sup>2</sup> =6.1<br><br>Pairwise Wilcox:<br>LCP-FCP: p=0.047<br>LCP-HCP: p=0.087<br>FCP-HCP: p=1.0 | Kruskal Wallis:<br>p<0.0001; Chi <sup>2</sup> =18.9<br>The organic layer harbored > 99 % of ddPCR-corr. reads assigned to this phylum.                                                               | LCP organic harbored < 1% of ddPCR-corr. reads assigned to this phylum.                      |
|                 | mineral      | 0.00 ± 0.00                             | $7.18 \times 10^2 \pm 4.80 \times 10^2$ | $8.11 \times 10^2 \pm 7.07 \times 10^2$ |                                                                                                                                     |                                                                                                                                                                                                      |                                                                                              |
|                 | cryoturbated | -                                       | $2.18 \times 10^3 \pm 1.68 \times 10^3$ | $2.16 \times 10^4 \pm 2.16 \times 10^4$ |                                                                                                                                     |                                                                                                                                                                                                      |                                                                                              |
|                 | permafrost   | 0.00 ± 0.00                             | 0.00 ± 0.00                             | 0.00 ± 0.00                             |                                                                                                                                     |                                                                                                                                                                                                      |                                                                                              |
| Kickxellomycota | organic      | $1.15 \times 10^4 \pm 1.10 \times 10^4$ | $3.06 \times 10^5 \pm 2.53 \times 10^5$ | $7.06 \times 10^3 \pm 7.06 \times 10^3$ | Kruskal Wallis: p=0.898;<br>Chi <sup>2</sup> =0.2                                                                                   | The organic layer harbored 94 % of ddPCR-corr. reads assigned to this phylum.                                                                                                                        | LCP organic harbored < 5% of ddPCR-corr. reads assigned to this phylum.                      |
|                 | mineral      | 0.00 ± 0.00                             | 0.00 ± 0.00                             | 0.00 ± 0.00                             |                                                                                                                                     |                                                                                                                                                                                                      |                                                                                              |
|                 | cryoturbated | -                                       | $6.77 \times 10^3 \pm 6.77 \times 10^3$ | $3.37 \times 10^3 \pm 3.37 \times 10^3$ |                                                                                                                                     |                                                                                                                                                                                                      |                                                                                              |
|                 | permafrost   | 0.00 ± 0.00                             | 0.00 ± 0.00                             | $2.51 \times 10^3 \pm 2.51 \times 10^3$ |                                                                                                                                     |                                                                                                                                                                                                      |                                                                                              |

|                              |              |                                           |                                           |                                           |                                                |                                                                                                                                       |                                                                         |
|------------------------------|--------------|-------------------------------------------|-------------------------------------------|-------------------------------------------|------------------------------------------------|---------------------------------------------------------------------------------------------------------------------------------------|-------------------------------------------------------------------------|
| Mortierellomycota            | organic      | 0.00 ± 0.00                               | 4.25 e <sup>4</sup> ± 4.25 e <sup>4</sup> | 9.03 e <sup>4</sup> ± 5.51 e <sup>4</sup> | Phylum is absent from LCP soils                | The organic layer harbored 82 % of ddPCR-corr. reads assigned to this phylum.                                                         |                                                                         |
|                              | mineral      | 0.00 ± 0.00                               | 2.73 e <sup>3</sup> ± 2.73 e <sup>3</sup> | 3.67 e <sup>2</sup> ± 2.40 e <sup>2</sup> |                                                |                                                                                                                                       |                                                                         |
|                              | cryoturbated | -                                         | 3.14 e <sup>3</sup> ± 2.18 e <sup>3</sup> | 4.14 e <sup>4</sup> ± 4.14 e <sup>4</sup> |                                                |                                                                                                                                       |                                                                         |
|                              | permafrost   | 0.00 ± 0.00                               | 4.58 e <sup>3</sup> ± 2.09 e <sup>3</sup> | 2.13 e <sup>3</sup> ± 2.13 e <sup>3</sup> |                                                |                                                                                                                                       |                                                                         |
| Rozellomycota                | organic      | 0.00 ± 0.00                               | 1.48 e <sup>5</sup> ± 1.03 e <sup>5</sup> | 2.30 e <sup>3</sup> ± 2.12 e <sup>6</sup> | Phylum is absent from LCP soils.               | The organic layer harbored 82 % of ddPCR-corr. reads assigned to this phylum.                                                         | LCP organic harbored >1 % of ddPCR-corr. reads assigned to this phylum. |
|                              | mineral      | 0.00 ± 0.00                               | 0.00 ± 0.00                               | 0.00 ± 0.00                               |                                                |                                                                                                                                       |                                                                         |
|                              | cryoturbated | -                                         | 2.01 e <sup>2</sup> ± 2.01 e <sup>2</sup> | 0.00 ± 0.00                               |                                                |                                                                                                                                       |                                                                         |
|                              | permafrost   | 0.00 ± 0.00                               | 0.00 ± 0.00                               | 0.00 ± 0.00                               |                                                |                                                                                                                                       |                                                                         |
| Unknown Taxa on phylum level | organic      | 6.11 e <sup>6</sup> ± 3.39 e <sup>6</sup> | 9.61 e <sup>7</sup> ± 4.33 e <sup>7</sup> | 4.62 e <sup>7</sup> ± 1.39 e <sup>7</sup> | Kruskal-Wallis: p=0.083; Chi <sup>2</sup> =5.0 | Kruskal Wallis: p<0.0001; Chi <sup>2</sup> =31.7<br>The organic layer harbored > 92 % of ddPCR-corr. reads unassigned at phylum level |                                                                         |
|                              | mineral      | 3.75 e <sup>4</sup> ± 4.58 e <sup>3</sup> | 1.31 e <sup>6</sup> ± 6.52 e <sup>5</sup> | 1.34 e <sup>6</sup> ± 6.85 e <sup>5</sup> |                                                |                                                                                                                                       |                                                                         |
|                              | cryoturbated | -                                         | 6.52 e <sup>6</sup> ± 4.24 e <sup>6</sup> | 1.23 e <sup>7</sup> ± 7.57 e <sup>6</sup> |                                                |                                                                                                                                       |                                                                         |
|                              | permafrost   | 5.49 e <sup>5</sup> ± 5.25 e <sup>5</sup> | 2.12 e <sup>6</sup> ± 1.08 e <sup>6</sup> | 2.30 e <sup>5</sup> ± 1.13 e <sup>5</sup> |                                                |                                                                                                                                       |                                                                         |
| Zoopagomycota                | organic      | 0.00 ± 0.00                               | 0.00 ± 0.00                               | 5.66 e <sup>4</sup> ± 5.66 e <sup>4</sup> | Phylum is solely present in HCP organic.       | Phylum is solely present in HCP organic.                                                                                              | HCP organic harbored 100% of ddPCR-corr. reads assigned to this phylum. |
|                              | mineral      | 0.00 ± 0.00                               | 0.00 ± 0.00                               | 0.00 ± 0.00                               |                                                |                                                                                                                                       |                                                                         |
|                              | cryoturbated | -                                         | 0.00 ± 0.00                               | 0.00 ± 0.00                               |                                                |                                                                                                                                       |                                                                         |
|                              | permafrost   | 0.00 ± 0.00                               | 0.00 ± 0.00                               | 0.00 ± 0.00                               |                                                |                                                                                                                                       |                                                                         |

Presented are means ± SE (LCP\_organic: n =12, FCP\_organic: n = 12, HCP\_organic: n = 11, LCP\_mineral: n = 2, FCP\_mineral: n = 6, HCP\_mineral: n = 6, FCP\_cryoturbated: n = 6, HCP\_cryoturbated: n = 6, LCP\_permafrost: n = 5, FCP\_permafrost: n = 6, HCP\_permafrost: n = 6, except for Basidiomycota where HCP\_organic: n = 10). Effects of polygon type, soil layer category, and their interaction were tested using linear mixed-effects models (Type III ANOVA), followed by Tukey-adjusted estimated marginal means for pairwise comparisons. When assumptions were not met, Kruskal–Wallis tests were performed, followed by Bonferroni-adjusted pairwise Wilcoxon tests for pairwise comparisons. For space saving reasons, the presented statistics refer mainly to the observations discussed in the main text. If phylum abundance estimates were too imbalanced for statistical testing, descriptive abundance information is stated instead. Abbreviations: HCPs = high-centered-, FCPs = flat-centered-, LCPs = low-centered polygons.

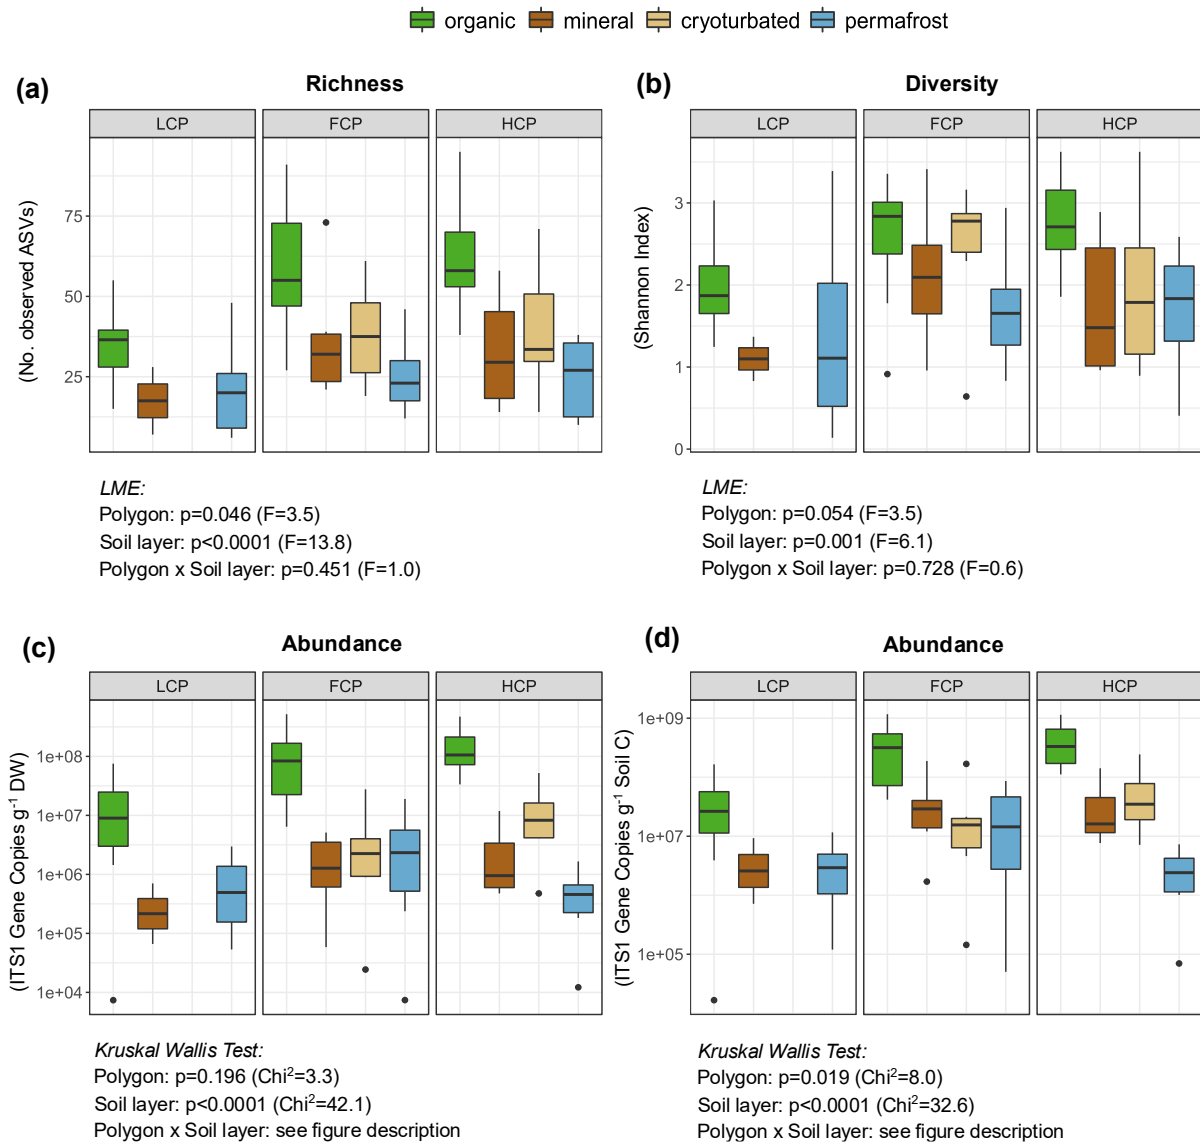

**Figure S9.** Fungal richness, diversity, and abundance estimates across soil layers and ice-wedge polygon types. Panels show (a) richness (number of observed ASVs), (b) diversity (Shannon index), (c) abundance proxy (ITS gene copies  $\text{g}^{-1}$  DW soil), and (d) abundance normalized to soil carbon content (ITS gene copies  $\text{g}^{-1}$  soil C). Sample sizes: LCP\_organic:  $n = 12$ , FCP\_organic:  $n = 12$ , HCP\_organic:  $n = 11$ , LCP\_mineral:  $n = 2$ , FCP\_mineral:  $n = 6$ , HCP\_mineral:  $n = 6$ , FCP\_cryoturbated:  $n = 6$ , HCP\_cryoturbated:  $n = 6$ , LCP\_permafrost:  $n = 5$ , FCP\_permafrost:  $n = 6$ , HCP\_permafrost:  $n = 6$ . Effects of polygon type and soil layer are indicated below the respective panels (linear mixed-effects models, ANOVA type III, or Kruskal Wallis tests). Pairwise comparisons were performed using Tukey-adjusted estimated marginal means or Bonferroni-adjusted pairwise Wilcoxon tests.

**Interactive effects:** (c) Fungal abundance (ITS1 gene copies  $\text{g}^{-1}$  DW) was significantly lower in the organic layer of LCPs compared to FCPs and HCPs (Kruskal Wallis:  $p = 0.0004$ ,  $\text{Chi}^2 = 15.91$ ; pairwise Wilcoxon: LCP vs. FCP:  $p = 0.013$ , LCP vs. HCP:  $p = 0.0005$ ). Fungal abundance varied across soil layers in all polygon types (Kruskal Wallis: LCP:  $p = 0.017$ ,  $\text{Chi}^2 = 8.21$ ; FCP:  $p = 0.0003$ ,  $\text{Chi}^2 = 19.15$ ; HCP:  $p < 0.0001$ ,  $\text{Chi}^2 = 21.89$ ). In all polygon types, the organic layer harbored higher fungal abundance

than the permafrost layer (pairwise Wilcoxon: LCP:  $p = 0.039$ ; FCP:  $p = 0.009$ ; HCP:  $p = 0.007$ ). In FCPs and HCPs, the organic layer also showed higher fungal abundance than in the mineral and cryoturbated layers (organic vs. mineral: FCP:  $p = 0.005$ ; HCP:  $p = 0.007$ ; organic vs. cryoturbated: FCP:  $p = 0.009$ ; HCP:  $p = 0.013$ ). **(d) Fungal abundance normalized to soil carbon content (ITS1 gene copies g<sup>-1</sup> soil C)** was higher in the organic layer than in the permafrost layer across all polygon types (pairwise Wilcoxon: LCP:  $p = 0.039$ ; FCP:  $p = 0.021$ ; HCP:  $p = 0.008$ ). In FCPs and HCPs, it also exceeded abundances in the mineral and cryoturbated layers (organic vs. mineral: FCP:  $p = 0.026$ , HCP:  $p = 0.017$ ; organic vs. cryoturbated: FCP:  $p = 0.012$ , HCP:  $p = 0.034$ ). In HCPs, all layers exhibited higher fungal abundance per soil C than the permafrost layer (mineral vs. permafrost:  $p = 0.030$ ; cryoturbated vs. permafrost:  $p = 0.049$ ). Abbreviations: HCPs = high-centered-, FCPs = flat-centered-, LCPs = low-centered polygons.

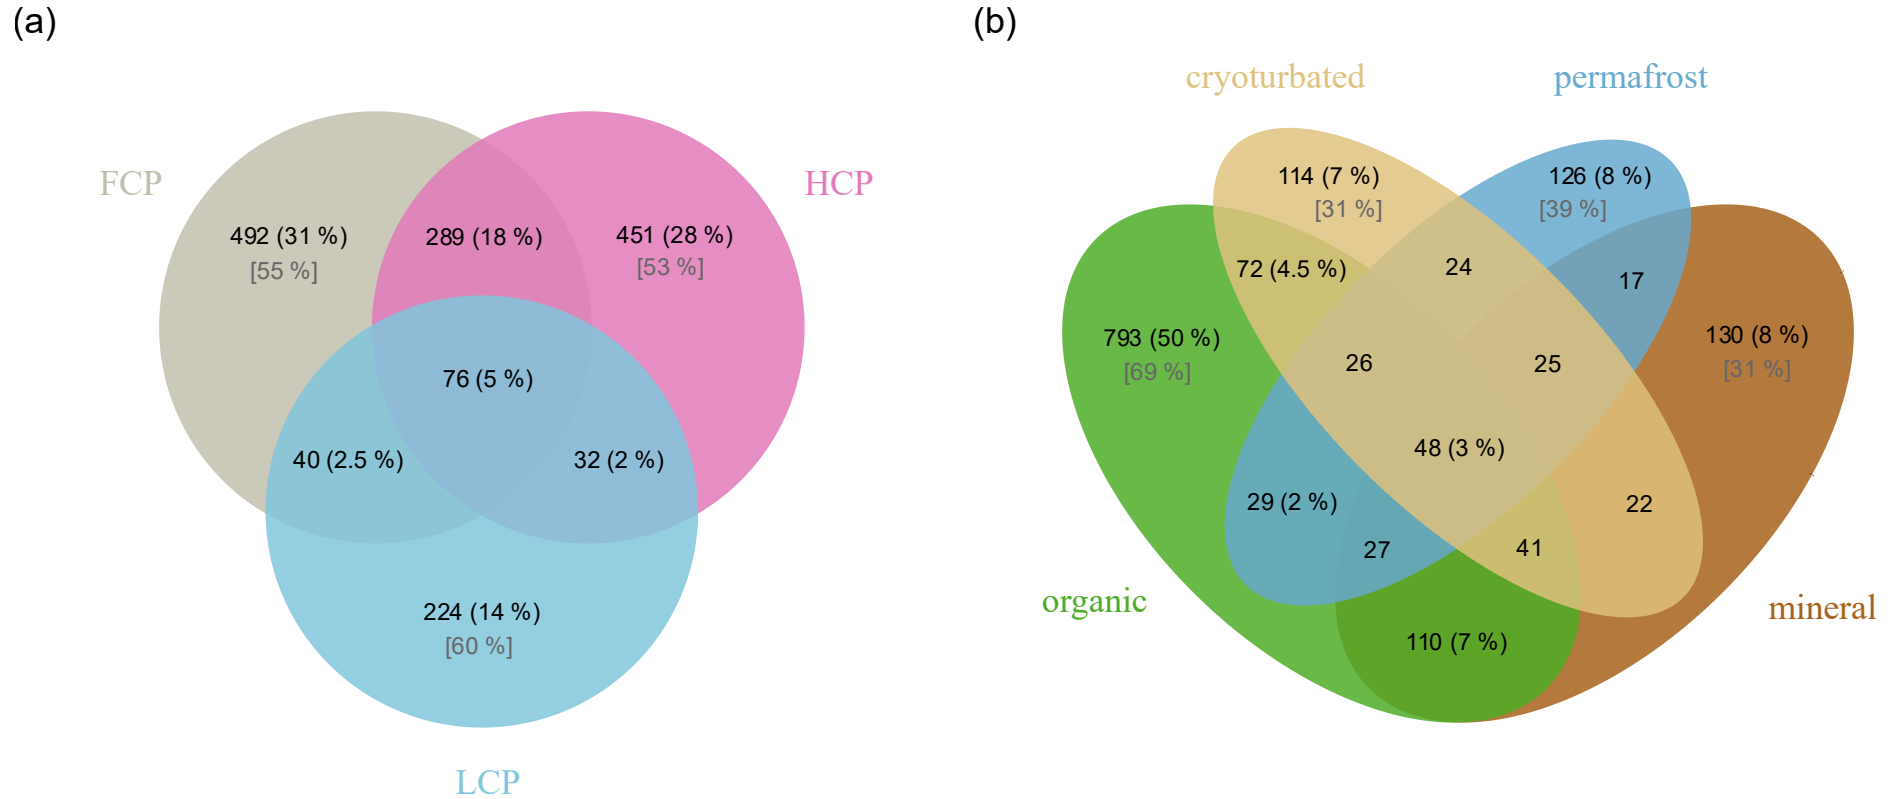

**Figure S10.** Venn Diagram depicting the number of shared and unique fungal ASVs among (a) ice-wedge polygon types (low-centered polygon, LCP,  $n = 19$ ; flat-centered polygon, FCP  $n = 30$ ; high-centered polygon, HCP = 29) and among (b) soil layers (organic topsoil = 35, mineral subsoil = 14, cryoturbated material = 12, permafrost = 17). Fractions of the shared and unique taxa relative to the total number of ASVs ( $n = 1604$ ) are shown as percentages (%; black). The proportion of polygon-specific or soil layer-specific ASVs relative to the number of ASVs within each polygon type or soil layer are given in [%; grey].

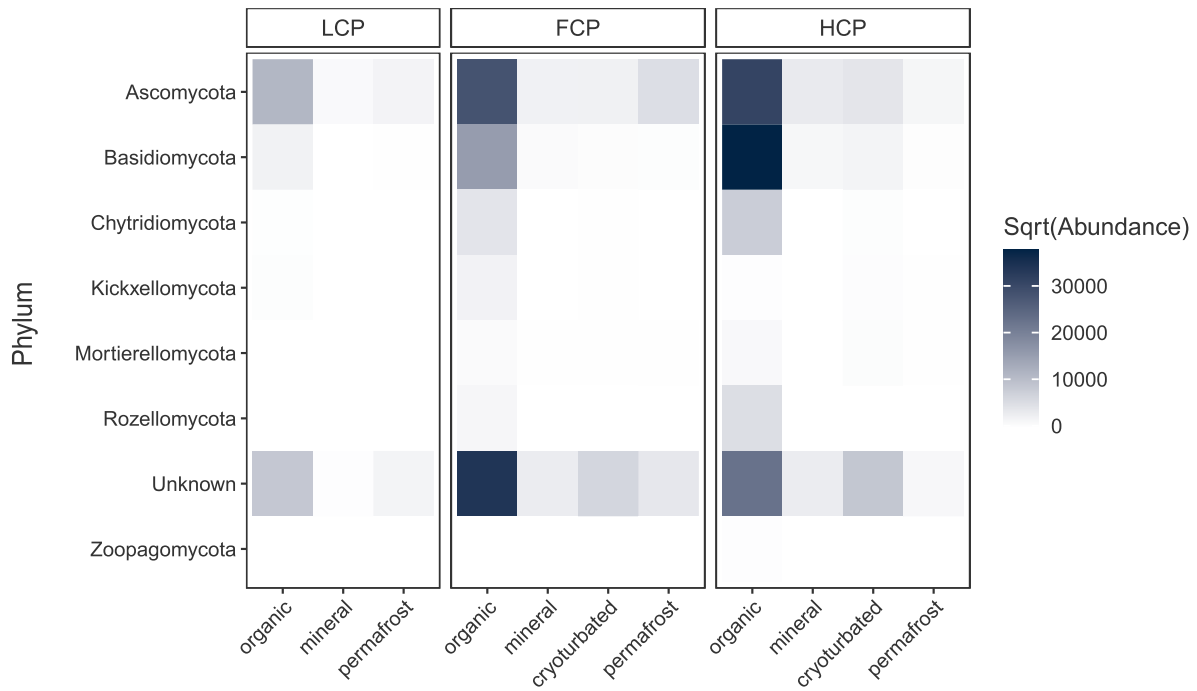

**Figure S11.** Heatmap showing ddPCR-informed abundance estimates (gene copy number corrected reads  $g^{-1}$  DW soil) of fungal phyla across ice-wedge polygon types and soil layers (LCP\_organic:  $n = 12$ , FCP\_organic:  $n = 12$ , HCP\_organic:  $n = 11$ , LCP\_mineral:  $n = 2$ , FCP\_mineral:  $n = 6$ , HCP\_mineral:  $n = 6$ , FCP\_cryoturbated:  $n = 6$ , HCP\_cryoturbated:  $n = 6$ , LCP\_permafrost:  $n = 5$ , FCP\_permafrost:  $n = 6$ , HCP\_permafrost:  $n=6$ ). Abundance estimates were square-root-transformed for improved visualization. “Unknown” denotes taxa that could not be assigned at the phylum level. Abbreviations: HCPs = high-centered-, FCPs = flat-centered-, LCPs = low-centered polygons.

190 **S5. Extracellular enzymatic activity potential**

191 We measured the potential activities of the six hydrolytic extracellular enzymes:  $\beta$ -D-1,4-cellobiosidase  
 192 (exoglucanase),  $\beta$ -D-1,4-glucosidase,  $\beta$ -1,4-N-acetyl- glucosaminidase (exochitinase), leucine-  
 193 aminopeptidase (protease), acid phosphatase, and sulfatase (Aryl-sulfate sulfohydrolase), using  
 194 microplate fluorometric assays as described in Canarini et al., (2021). Per sample, one gram of soil was  
 195 suspended in 100 ml sodium acetate buffer (100 mM, pH 5.5) and subsequently sonicated to an energy  
 196 absorption of 350 J. 200  $\mu$ l of the soil suspension and 50  $\mu$ l of substrate were pipetted into black  
 197 microtiter plates in five technical replicates. The used substrates were: 4-MUF- $\beta$ -D-cellobioside, 4-MUF-  
 198  $\beta$ -D-glucoside, 4-MUF-N-acetyl- $\beta$ -D-glucosaminide, L-Leucine-7-amino-4-methylcoumarin, 4-MUF-  
 199 phosphate, 4-MUF-sulfate. 4-Methylumbelliferone (MUF) was used as standard for cellobiosidase,  $\beta$ -  
 200 glucosidase, exochitinase, phosphatase and sulfatase, whereas 7-Amino-4-methylcoumarine (AMC)  
 201 was used to calibrate protease activity. All plates were incubated at 20 °C for 15 minutes in the dark  
 202 and fluorescence was measured at 365 nm excitation and 450 nm emission (Tecan Infinite  
 203 M200fluorimeter, Werfen, Austria) every 30 minutes for 3 hours. Potential extracellular enzymatic  
 204 activities were calculated considering the increase in fluorescence between measurement time points.

**Table S8.** Correlations between potential extracellular enzymatic activities ( $\text{nmol g}^{-1} \text{DW soil h}^{-1}$ ) and soil carbon, nitrogen, and phosphorus contents ( $\text{mg g}^{-1} \text{DW soil}$ ).

|                            | Soil C                                                     | Soil N                                                   | Soil P                                                   |
|----------------------------|------------------------------------------------------------|----------------------------------------------------------|----------------------------------------------------------|
| Betaglucosidase            | $\rho (79) = 0.743$ ;<br><b><math>p &lt; 0.0001</math></b> |                                                          |                                                          |
| Exoglucanase               | $\rho (77) = 0.646$<br><b><math>p &lt; 0.0001</math></b>   |                                                          |                                                          |
| Exochitinase               | $\rho (78) = 0.471$<br><b><math>p &lt; 0.0001</math></b>   | $\rho (78) = 0.471$<br><b><math>p &lt; 0.0001</math></b> |                                                          |
| Leucine-<br>Aminopeptidase | $\rho (79) = 0.663$<br><b><math>p &lt; 0.0001</math></b>   | $\rho (79) = 0.660$<br><b><math>p &lt; 0.0001</math></b> |                                                          |
| Acid Phosphatase           | $\rho (79) = 0.810$<br><b><math>p &lt; 0.0001</math></b>   |                                                          | $\rho (78) = 0.594$<br><b><math>p &lt; 0.0001</math></b> |
| Sulfatase                  | $\rho (75) = 0.680$<br><b><math>p &lt; 0.0001</math></b>   |                                                          |                                                          |

205

Presented are Spearman's rank-order correlation coefficients ( $\rho$ ) with corresponding degrees of freedom (df) and two-sided p-values..

**Table S9.** Interactive effects of polygon type and soil layer on potential extracellular enzymatic activities (nmol substrate g<sup>-1</sup> soil C h<sup>-1</sup>), corresponding to Figure 5.

| Soil Layer   | Polygon     | Betaglucosidase<br>(emmeans) | Exoglucanase<br>(pairwise Wilcox) | Exochitinase<br>(emmeans) | Leucine Aminopeptidase<br>(pairwise Wilcox) | Acid Phosphatase<br>(pairwise Wilcox) |
|--------------|-------------|------------------------------|-----------------------------------|---------------------------|---------------------------------------------|---------------------------------------|
| organic      | LCP vs. FCP | <b>p&lt;0.0001</b> ; t=-6.6  | <b>p=0.003</b> ; w=15             | <b>p=0.010</b> ; t=-3.2   | <b>p=0.070</b> ; w=33                       | <b>p=0.000</b> ; w=8                  |
|              | LCP vs. HCP | <b>p=0.001</b> ; t=-3.9      | <b>p=0.002</b> ; w=10             | p=0.872; t=-0.5           | <b>p=0.063</b> ; w=28                       | p=0.118; w=32                         |
|              | FCP vs. HCP | <b>p=0.035</b> ; t=2.6       | p=0.765; w=85                     | <b>p=0.034</b> ; t=2.6    | p=1.0; w=68                                 | p=0.396; w=91                         |
| mineral      | LCP vs. FCP | p=0.981; t=0.2               | p=1.0; w=7                        | p=0.641; t=-0.9           | p=0.729; w=2                                | p=1.0; w=5                            |
|              | LCP vs. HCP | p=0.920; t=0.4               | p=1.0; w=5                        | p=0.458; t=-1.2           | p=1.0; w=3                                  | p=1.0; w=6                            |
|              | FCP vs. HCP | p=0.955; t=0.3               | p=1.0; w=9                        | p=0.928; t=-0.4           | p=1.0; w=20                                 | p=1.0; w=18                           |
| cryoturbated | FCP vs. HCP | p=0.962; t=0.3               | p=0.617; w=25                     | p=0.082; t=-2.2           | p=0.830; w=23                               | p=0.170; w=11                         |
| permafrost   | LCP vs. FCP | p=0.0895; t=-2.1             | <b>p=0.010</b> ; w=0              | <b>p=0.026</b> ; t=-2.7   | p=0.115; w=6                                | p=1.0; w=18                           |
|              | LCP vs. HCP | p=0.999; t=-0.1              | p=0.197; w=6                      | <b>p=0.006</b> ; t=-3.2   | p=1.0; w=16                                 | p=1.0; w=18                           |
|              | FCP vs. HCP | p=0.100; t=2.1               | <b>p=0.025</b> ; w=40             | p=0.814; t=-0.6           | p=1.0; w=26                                 | p=1.0; w=25                           |

| Polygon | Soil Layer                  | Betaglucosidase<br>(emmeans) | Exoglucanase<br>(pairwise Wilcox) | Exochitinase<br>(emmeans) | Leucine Aminopeptidase<br>(pairwise Wilcox) | Acid Phosphatase<br>(pairwise Wilcox) |
|---------|-----------------------------|------------------------------|-----------------------------------|---------------------------|---------------------------------------------|---------------------------------------|
| LCP     | organic vs. mineral         | p=0.870; t=0.8               | p=1.0; w=15                       | p=0.874; t=0.8            | p=0.171; w=20                               | p=0.235; w=20                         |
|         | organic vs. permafrost      | p=0.991; t=0.3               | p=1.0; w=43                       | p=0.999; t=-0.1           | p=0.110; w=59                               | p=0.147; w=52                         |
|         | mineral vs. permafrost      | p=0.949; t=-0.5              | p=1.0; w=6                        | p=0.874; t=-0.8           | p=1.0; w=6                                  | p=0.877 w=5                           |
| FCP     | organic vs. mineral         | <b>p&lt;0.0001</b> ; t=6.9   | <b>p=0.043</b> ; w=56             | <b>p=0.055</b> ; t=2.6    | p=0.882; w=52                               | <b>p=0.010</b> ; w=70                 |
|         | organic vs. cryoturbated    | <b>p&lt;0.0001</b> ; t=5.1   | p=0.23; w=67                      | p=0.904; t=0.7            | p=0.708; w=61                               | <b>p=0.028</b> ; w=76                 |
|         | organic vs. permafrost      | <b>p=0.006</b> ; t=3.5       | p=0.187; w=68                     | p=0.996; t=-0.2           | <b>p=0.036</b> ; w=75                       | <b>p=0.003</b> ; w=84                 |
|         | mineral vs. cryoturbated    | p=0.991; t=-1.8              | p=1.0; w=9                        | p=0.275; t=-1.8           | p=1.0; w=16                                 | p=1.0; w=17                           |
|         | mineral vs. permafrost      | <b>p=0.012</b> ; t=-3.2      | p=0.444; w=6                      | p=0.062; t=-2.6           | p=1.0; w=30                                 | p=1.0; w=23                           |
|         | cryoturbated vs. permafrost | p=0.991; t=-1.5              | p=1.0; w=18                       | p=0.848; t=-0.8           | p=0.960; w=36                               | p=1.0; w=34                           |
| HCP     | organic vs. mineral         | <b>p&lt;0.0001</b> ; t=5.0   | p=0.076; w=50                     | p=0.974; t=-0.4           | p=0.472; w=51                               | p=0.109; w=57                         |
|         | organic vs. cryoturbated    | <b>p=0.020</b> ; t=3.0       | p=0.062; w=59                     | <b>p=0.0001</b> ; t=-4.8  | p=0.584; w=50                               | p=0.378; w=52                         |
|         | organic vs. permafrost      | <b>p=0.006</b> ; t=3.4       | <b>p=0.034</b> ; w=61             | <b>p=0.003</b> ; t=-3.7   | <b>p=0.013</b> ; w=64                       | p=0.083; w=58                         |
|         | mineral vs. cryoturbated    | p=0.307; t=-1.8              | p=1.0; w=12                       | <b>p=0.002</b> ; t=-3.9   | p=1.0; w=16                                 | p=1.0; w=11                           |
|         | mineral vs. permafrost      | p=0.515; t=-1.4              | p=1.0; w=13                       | <b>p=0.030</b> ; t=-2.9   | p=1.0; w=24                                 | p=1.0; w=19                           |
|         | cryoturbated vs. permafrost | p=0.983; t=0.4               | p=1.0; w=20                       | p=0.756; t=1.0            | p=0.394; w=30                               | p=0.272; w=31                         |

Pairwise comparisons are shown (Tukey-adjusted estimated marginal means following linear mixed-effects models, or Bonferroni-adjusted pairwise Wilcoxon tests following Kruskal Wallis tests). No significant interaction was detected for sulfatase activity. Abbreviations: HCPs = high-centered-, FCPs = flat-centered-, LCPs = low-centered polygons.

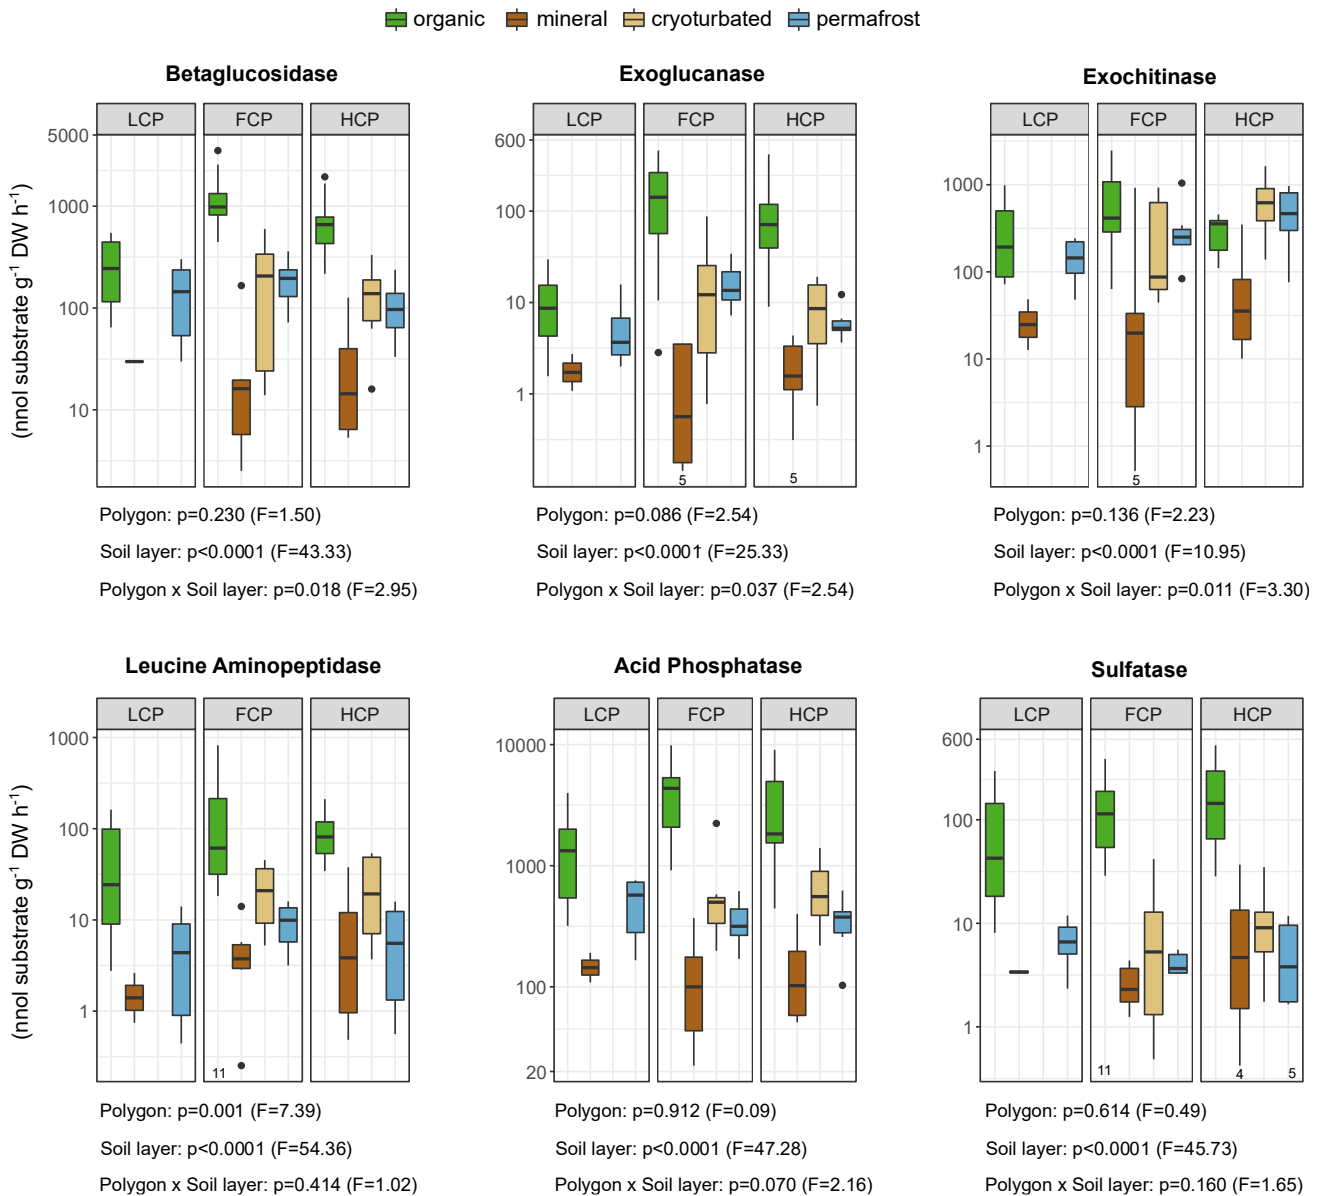

**Figure S12.** Potential extracellular enzymatic activities across soil layers and ice-wedge polygon types. Potential activities of C-, N-, P- and S-acquiring enzymes are shown as rates ( $\text{nmol substrate g}^{-1} \text{DW soil h}^{-1}$ ) on a logarithmic scale for improved readability. Boxplots depict median values and interquartile ranges. Sample sizes: (LCP\_organic:  $n = 12$ , FCP\_organic:  $n = 12$ , HCP\_organic:  $n = 11$ , LCP\_mineral:  $n = 2$ , FCP\_mineral:  $n = 6$ , HCP\_mineral:  $n = 6$ , FCP\_cryoturbated:  $n = 7$ , HCP\_cryoturbated:  $n = 6$ , LCP\_permafrost:  $n = 6$ , FCP\_permafrost:  $n = 7$ , HCP\_permafrost:  $n = 6$ ). Individual deviations are indicated below the respective boxplots.

Effects of polygon type and soil layer category are indicated below the respective panels (LME ANOVA type III or Kruskal Wallis test results). **Interactive effects:** The organic layer of low-centered polygons (LCPs) exhibited lower betaglucosidase- (LCP vs. FCP:  $p < 0.0001$ ,  $t = -5.1$ , LCP vs. HCP:  $p = 0.007$ ,  $t = -3.2$ ), exoglucanase- (LCP vs. FCP:  $p < 0.0001$ ,  $t = -5.1$ , LCP vs. HCP:  $p = 0.0004$ ,  $t = -4.2$ ), and acid phosphatase- (LCP vs. FCP:  $p = 0.002$ ,  $t = -3.6$ , LCP vs. HCP:  $p = 0.065$ ,  $t = -2.3$ ) -rates compared to the organic layers of

*flat-centered (FCPs) and high-centered polygons (HCPs). In addition, the permafrost layer of LCPs exhibited lower exochitinase activity than the permafrost samples of HCPs (LCP vs. HCP:  $p = 0.055$ ,  $t = -2.4$ ).*

## 206 S6. Statistics

207 We employed linear-mixed-effects models (LMEs) to test all univariate variables for the fixed effects of  
208 'ice-wedge polygon type' and 'soil layer category' plus their interaction. Therefore, we used the  
209 packages lme4 (Bates et al., 2015), lmerTest (Kuznetsova et al., 2017), emmeans, (Lenth et al., 2022)  
210 and car (Fox and Weisberg, 2019). While we acknowledge the difference in glaciation history between  
211 the examined sites, we anticipated only negligible historical influences on the characteristics of the  
212 recent SOM pool and microbial communities. Due to the sites' very similar landscape, climate, soils,  
213 and vegetation, we determined the random effect in the lme model as specific soil pit ID blocked within  
214 the sampling site (model<-lmer(variable~polygon.type\*soil.layer + (1|site/soil pit)). Model results were  
215 inspected using the anova() function with the default being a type III analysis of variance (ANOVA). In  
216 the case of no interactive effect being observed we used type II ANOVA to account for potential effects  
217 of different treatment replicates (Langsrud, 2003) . We used the Estimated Marginal Means post hoc  
218 test to perform multiple comparisons on the fixed effects of polygon type and soil layer category  
219 (emmeans(model,pairwise~Polygon.type,adjust='tukey'),  
220 ememans(model,pairwise~Soil.layer.,adjust='tukey'). In the case of an interactive effect being observed  
221 by ANOVA result and /or visual investigation of the data, we compared (a) differences between soil  
222 layers per type of polygon (emmeans(model,pairwise~Soil.layer. |Polygon.type, adjust='tukey') and (b)  
223 differences between polygon types per soil layer category (emmeans(model,pairwise~ Polygon.type  
224 |Soil.layer, adjust='tukey'). We checked for homogeneity of variances and normality of model residuals  
225 by inspecting frequency histograms, boxplots, QQ-plots, and via Shapiro and Levene tests. If model  
226 assumptions were not met, a log- or sqrt-transformation was applied. In case of no agreement with  
227 model assumptions after transformation, we conducted nonparametric tests (for variable specific  
228 details, see 10.5281/zenodo.18631833. Kruskal Wallis tests were used to test the effects of  
229 Polygon.type and Soil.layer, followed by pairwise two-sided Wilcoxon tests (function  
230 pairwise.wilcox.test(), p.adjust='bonferroni'). We also applied Wilcoxon tests on respectively subsetted  
231 parts of the dataset to check for possible interactive effects in a comparable manner as described for  
232 the LME models and additionally used faceted boxplots for checking the distribution of the examined  
233 parameter among all soil layer categories within each type of polygon.

234 We employed the phyloseq package (McMurdie and Holmes, 2013) for handling the multivariate  
235 datasets on amplicon sequencing and SOM chemical composition. Following Alteio et al., (2021), we  
236 applied a centered log-ratio (clr) data normalization (microbiome:: transform(phyloseq.object, "clr") and  
237 calculated Euclidean distance matrices (phyloseq::distance(phyloseq.object, "euclidean"). We  
238 performed Principal Component Analyses (PCAs) for visualization, employing the function  
239 'phyloseq::ordinate()'. We used Permutational Multivariate Analysis of Variance (PERMANOVA) to  
240 explore the effects of polygon type and soil layer and their possible interaction (adonis()-function  
241 implemented in vegan with 999 permutations and p.adjust.m='bonferroni'; vegan version 2.5-7,  
242 Oksanen et al., 2020). We tested differences between polygon types and/or soil layer by pairwise  
243 multilevel comparisons (paiwise.adonis()-function implemented in vegan with 999 permutations and  
244 p.adjust.m='bonferroni'). In case of interactive effects, we used subsetted datasets for making pairwise

245 tests. Analogously as described for the LME model, we tested for (a) differences between soil layers  
246 within each polygon type and (b) for differences between polygon types for each soil layer. As  
247 PERMANOVA test results are sensitive to heterogenous dispersions among the investigated groups,  
248 we tested their variance of dispersion using Permutation Tests for Multivariate Dispersion Homogeneity  
249 (PERMDIST), implemented in vegan (vegan::betadisper()-function) using 999 permutations and the  
250 argument 'bias.adjust=T' for unequal sample numbers (Anderson, 2017). We used Venn diagrams  
251 (get\_vennlist(phyloseq.object)) for visualizing the fraction of shared versus unique pyrolysis products  
252 and/or microbial ASVs among polygon types and soil layers respectively (MicrobiotaProcess package,  
253 (Xu et al., 2022)

## 254 S7. References:

255

256 Aitchison, J.: The statistical analysis of geochemical compositions, *Journal of the International*  
257 *Association for Mathematical Geology*, 16, 531–564, <https://doi.org/10.1007/BF01029316>, 1984.

258 Alteio, L. V., Séneca, J., Canarini, A., Angel, R., Jansa, J., Guseva, K., Kaiser, C., Richter, A., and  
259 Schmidt, H.: A critical perspective on interpreting amplicon sequencing data in soil ecological  
260 research, *Soil Biology and Biochemistry*, 160, <https://doi.org/10.1016/j.soilbio.2021.108357>, 2021.

261 Anderson, M.: Permutational Multivariate Analysis of Variance (PERMANOVA), 1–15,  
262 <https://doi.org/10.1002/9781118445112.stat07841>, 2017.

263 Apprill, A., McNally, S., Parsons, R., and Weber, L.: Minor revision to V4 region SSU rRNA 806R  
264 gene primer greatly increases detection of SAR11 bacterioplankton, *Aquatic Microbial Ecology*, 75,  
265 129–137, 2015.

266 Barlow, J. T., Bogatyrev, S. R., and Ismagilov, R. F.: A quantitative sequencing framework for  
267 absolute abundance measurements of mucosal and lumenal microbial communities, *Nat Commun*,  
268 11, 2590, <https://doi.org/10.1038/s41467-020-16224-6>, 2020.

269 Bates, D., Mächler, M., Bolker, B., and Walker, S.: Fitting Linear Mixed-Effects Models Using lme4,  
270 *Journal of Statistical Software*, 67, 1–48, <https://doi.org/10.18637/jss.v067.i01>, 2015.

271 Beck, H., Zimmermann, N., McVicar, T., Vergopolan, N., Berg, A., and Wood, E.: Present and future  
272 Köppen-Geiger climate classification maps at 1-km resolution, *Scientific Data*, 5, 180214,  
273 <https://doi.org/10.1038/sdata.2018.214>, 2018.

274 Brooks, G. R. and Lane, L. S.: A guide to the landscape of the Firth River Valley, Ivvavik National  
275 Park, 2011.

276 Buurman, P., Van Bergen, P. F., Jongmans, A. G., Meijer, E. L., Duran, B., and Van Lagen, B.:  
277 Spatial and temporal variation in podzol organic matter studied by pyrolysis-gas  
278 chromatography/mass spectrometry and micromorphology, *European Journal of Soil Science*, 56,  
279 253–270, <https://doi.org/10.1111/j.1365-2389.2004.00662.x>, 2005.

280 Canarini, A., Schmidt, H., Fuchslueger, L., Martin, V., Herbold, C. W., Zezula, D., Gündler, P.,  
281 Hasibeder, R., Jecmenica, M., Bahn, M., and Richter, A.: Ecological memory of recurrent drought  
282 modifies soil processes via changes in soil microbial community, *Nature Communications*, 12, 1–14,  
283 <https://doi.org/10.1038/s41467-021-25675-4>, 2021.

284 Couture, N. J. and Pollard, W. H.: A Model for Quantifying Ground-Ice Volume, Yukon Coast, Western  
285 Arctic Canada, *Permafrost and Periglacial Processes*, 28, 534–542, <https://doi.org/10.1002/ppp.1952>,  
286 2017.

287 D'Angelo, E. and Crutchfield, J.: Rapid, Sensitive, Microscale Determination of Phosphate in Water  
288 and Soil, *Journal of Environment Quality*, 30, 2206, 2001.

289 Dyke, A. and Prest, V.: Late Wisconsinan and Holocene History of the Laurentide Ice Sheet,  
290 *Géographie physique et Quaternaire*, 41, 237–263, <https://doi.org/10.7202/032681ar>, 1987.

291 Fox, J. and Weisberg, S.: An R Companion to Applied Regression, Third Edition, Sage: Thousand  
292 Oaks, CA, USA, 2019.

293 Frank-Fahle, B. A., Yergeau, É., Greer, C. W., Lantuit, H., and Wagner, D.: Microbial functional  
294 potential and community composition in permafrost-affected soils of the NW Canadian Arctic, *PLoS*  
295 *ONE*, 9, <https://doi.org/10.1371/journal.pone.0084761>, 2014.

296 Fritz, M., Wetterich, S., Schirrmeister, L., Meyer, H., Lantuit, H., Preusser, F., and Pollard, W. H.:  
 297 Eastern Beringia and beyond: Late Wisconsinan and Holocene landscape dynamics along the Yukon  
 298 Coastal Plain, Canada, *Palaeogeography, Palaeoclimatology, Palaeoecology*, 319–320, 28–45,  
 299 <https://doi.org/10.1016/j.palaeo.2011.12.015>, 2012.

300 Gloor, G. B., Macklaim, J. M., Pawlowsky-Glahn, V., and Egozcue, J. J.: Microbiome Datasets Are  
 301 Compositional: And This Is Not Optional, *Front. Microbiol.*, 8, 2224,  
 302 <https://doi.org/10.3389/fmicb.2017.02224>, 2017.

303 González-Pérez, M., Buurman, P., Vidal-Torrado, P., and Martin-Neto, L.: Pyrolysis-Gas  
 304 Chromatography/Mass Spectrometry Characterization of Humic Acids in Coastal Spodosols from  
 305 Southeastern Brazil, *Soil Science Society of America Journal*, 76, 961–971,  
 306 <https://doi.org/10.2136/sssaj2011.0178>, 2012.

307 Canadian Climate Normals & Averages: [http://climate.weather.gc.ca/climate\\_normals/index\\_e.html](http://climate.weather.gc.ca/climate_normals/index_e.html).

308 Hempfling, R. and Schulten, H. R.: Chemical characterization of the organic matter in forest soils by  
 309 Curie point pyrolysis-GC/MS and pyrolysis-field ionization mass spectrometry, *Organic Geochemistry*,  
 310 15, 131–145, [https://doi.org/10.1016/0146-6380\(90\)90078-E](https://doi.org/10.1016/0146-6380(90)90078-E), 1990.

311 Kim, S., Chen, J., Cheng, T., Gindulyte, A., He, J., He, S., Li, Q., Shoemaker, B. A., Thiessen, P. A.,  
 312 Yu, B., Zaslavsky, L., Zhang, J., and Bolton, E. E.: PubChem 2023 update., *Nucleic acids research*,  
 313 51, D1373–D1380, <https://doi.org/10.1093/nar/gkac956>, 2023.

314 Kuo, S.: Phosphorus. In *Methods of Soil Analysis, Part 3: Chemical Methods.*, Soil Science Society of  
 315 America, 869–919 pp., 1996.

316 Kuznetsova, A., Brockhoff, P. B., and Christensen, R. H. B.: lmerTest Package: Tests in Linear Mixed  
 317 Effects Models, *Journal of Statistical Software*, 82, 1–26, <https://doi.org/10.18637/jss.v082.i13>, 2017.

318 Langsrud, Ø.: ANOVA for unbalanced data: Use Type II instead of Type III sums of squares, *Statistics  
 319 and computing*, 13, 163–167, 2003.

320 Lenth, R. V., Buerkner, P., Herve, M., Love, J., Miguez, F., Riebl, H., and Singmann, H.: Package  
 321 “Emmeans”(Version R Package 1.7. 2): Estimated Marginal Means, Aka Least-Squares Means  
 322 [Computer Software], 2022.

323 Martin, V., Schmidt, H., Canarini, A., Koranda, M., Hausmann, B., Müller, C. W., and Richter, A.: Soil  
 324 cover shapes organic matter pools and microbial communities in soils of maritime Antarctica,  
 325 *Geoderma*, 446, 116894, <https://doi.org/10.1016/j.geoderma.2024.116894>, 2024.

326 McMurdie, P. J. and Holmes, S.: phyloseq: An R Package for Reproducible Interactive Analysis and  
 327 Graphics of Microbiome Census Data, *PLOS ONE*, 8, 1–11,  
 328 <https://doi.org/10.1371/journal.pone.0061217>, 2013.

329 Ninnes, S., Tolu, J., Meyer-Jacob, C., Mighall, T. M., and Bindler, R.: Investigating molecular changes  
 330 in organic matter composition in two Holocene lake-sediment records from central Sweden using  
 331 pyrolysis-GC/MS, *Journal of Geophysical Research: Biogeosciences*, 122, 1423–1438,  
 332 <https://doi.org/10.1002/2016JG003715>, 2017.

333 Oksanen, J., Blanchet, F. G., Friendly, M., Kindt, R., Legendre, P., McGlenn, D., Minchin, P. R.,  
 334 O’Hara, R. B., Simpson, G. L., Solymos, P., Stevens, M. H. H., Szoecs, E., Wagner, H., 2020. vegan:  
 335 Community Ecology Package. R package version 2.5-7. <https://CRAN.R-project.org/package=vegan>.

336 Parada, A. E., Needham, D. M., and Fuhrman, J. A.: Every base matters: assessing small subunit  
 337 rRNA primers for marine microbiomes with mock communities, time series and global field samples,  
 338 *Environmental Microbiology*, 18, 1403–1414, <https://doi.org/10.1111/1462-2920.13023>, 2016.

339 Pjevac, P., Hausmann, B., Schwarz, J., Kohl, G., Herbold, C. W., Loy, A., and Berry, D.: An  
340 Economical and Flexible Dual Barcoding, Two-Step PCR Approach for Highly Multiplexed Amplicon  
341 Sequencing, *Frontiers in Microbiology*, 12, <https://doi.org/10.3389/fmicb.2021.669776>, 2021.

342 Pölme, S., Abarenkov, K., Henrik Nilsson, R., Lindahl, B. D., Clemmensen, K. E., Kauserud, H.,  
343 Nguyen, N., Kjølner, R., Bates, S. T., Baldrian, P., Frøslev, T. G., Adojaan, K., Vizzini, A., Suija, A.,  
344 Pfister, D., Baral, H. O., Järv, H., Madrid, H., Nordén, J., Liu, J. K., Pawlowska, J., Pöldmaa, K.,  
345 Pärtel, K., Runnel, K., Hansen, K., Larsson, K. H., Hyde, K. D., Sandoval-Denis, M., Smith, M. E.,  
346 Toome-Heller, M., Wijayawardene, N. N., Menolli, N., Reynolds, N. K., Drenkhan, R.,  
347 Maharachchikumbura, S. S. N., Gibertoni, T. B., Læssøe, T., Davis, W., Tokarev, Y., Corrales, A.,  
348 Soares, A. M., Agan, A., Machado, A. R., Argüelles-Moyao, A., Detheridge, A., de Meiras-Ottoni, A.,  
349 Verbeken, A., Dutta, A. K., Cui, B. K., Pradeep, C. K., Marín, C., Stanton, D., Gohar, D., Wanasinghe,  
350 D. N., Otsing, E., Aslani, F., Griffith, G. W., Lumbsch, T. H., Grossart, H. P., Masigol, H., Timling, I.,  
351 Hiiesalu, I., Oja, J., Kupagme, J. Y., Geml, J., Alvarez-Manjarrez, J., Ilves, K., Loit, K., Adamson, K.,  
352 Nara, K., Küngas, K., Rojas-Jimenez, K., Bitenieks, K., Irinyi, L., Nagy, L. L., Soonvald, L., Zhou, L.  
353 W., Wagner, L., Aime, M. C., Öpik, M., Mujica, M. I., Metsoja, M., Ryberg, M., Vasar, M., Murata, M.,  
354 Nelsen, M. P., Cleary, M., Samarakoon, M. C., Doilom, M., Bahram, M., Hagh-Doust, N., Dulya, O.,  
355 Johnston, P., Kohout, P., Chen, Q., Tian, Q., Nandi, R., Amiri, R., Perera, R. H., et al.: FungalTraits: a  
356 user-friendly traits database of fungi and fungus-like stramenopiles, *Fungal Diversity*, 105,  
357 <https://doi.org/10.1007/s13225-020-00466-2>, 2020.

358 Rampton, V. N.: Quaternary Geology Yukon Coastal Plain, Yukon Territory-Northwest Territory, ,  
359 <https://doi.org/10.4095/111348>, 1982.

360 Said, M., John, G., Mhilo, C., and Manyele, S.: The Study of Kinetic Properties and Analytical  
361 Pyrolysis of Coconut Shells, *Journal of Renewable Energy*, 2015, 307329,  
362 <https://doi.org/10.1155/2015/307329>, 2015.

363 Saiz-Jimenez, C. and De Leeuw, J. W.: Chemical characterization of soil organic matter fractions by  
364 analytical pyrolysis-gas chromatography-mass spectrometry, *Journal of Analytical and Applied  
365 Pyrolysis*, 9, 99–119, [https://doi.org/10.1016/0165-2370\(86\)85002-1](https://doi.org/10.1016/0165-2370(86)85002-1), 1986.

366 Schulten, H. R. and Schnitzer, M.: The chemistry of soil organic nitrogen: A review, *Biology and  
367 Fertility of Soils*, 26, 1–15, <https://doi.org/10.1007/s003740050335>, 1997.

368 Shen, Q., Suarez-Abelenda, M., Camps-Arbestain, M., Calvelo Pereira, R., McNally, S. R., and  
369 Kelliher, F.: Data on the organic matter characteristics of New Zealand soils under different land uses,  
370 *Data in Brief*, 21, 620–638, <https://doi.org/10.1016/j.dib.2018.10.016>, 2018.

371 Smith, D. P. and Peay, K. G.: Sequence depth, not PCR replication, improves ecological inference  
372 from next generation DNA sequencing., *PloS one*, 9, e90234,  
373 <https://doi.org/10.1371/journal.pone.0090234>, 2014.

374 Soil Classification Working Group: The Canadian System of Soil Classification, 187 pp. pp., 1998.

375 Speetjens, N. J., Tanski, G., Martin, V., Wagner, J., Richter, A., Hugelius, G., Boucher, C., Lodi, R.,  
376 Knoblauch, C., Koch, B. P., Wünsch, U., Lantuit, H., and Vonk, J. E.: Dissolved organic matter  
377 characterization in soils and streams in a small coastal low-Arctic catchment, *Biogeosciences*, 19,  
378 3073–3097, <https://doi.org/10.5194/bg-19-3073-2022>, 2022.

379 Stewart, C. E.: Evaluation of angiosperm and fern contributions to soil organic matter using two  
380 methods of pyrolysis-gas chromatography-mass spectrometry, *Plant and Soil*, 351, 31–46,  
381 <https://doi.org/10.1007/s11104-011-0927-3>, 2012.

382 Tarnocai, C.: Northern Soil Research in Canada - Cryosols: Permafrost-Affected Soils, edited by:  
383 Kimble, J. M., Springer Berlin Heidelberg, Berlin, Heidelberg, 29–43, [https://doi.org/10.1007/978-3-662-06429-0\\_3](https://doi.org/10.1007/978-3-662-06429-0_3), 2004.

385 Tolu, J., Gerber, L., Boily, J.-F., and Bindler, R.: High-throughput characterization of sediment organic  
386 matter by pyrolysis–gas chromatography/mass spectrometry and multivariate curve resolution: A

- 387 promising analytical tool in (paleo)limnology, *Analytica Chimica Acta*, 880, 93–102,  
388 <https://doi.org/10.1016/j.aca.2015.03.043>, 2015.
- 389 Vancampenhout, K., Wouters, K., De Vos, B., Buurman, P., Swennen, R., and Deckers, J.:  
390 Differences in chemical composition of soil organic matter in natural ecosystems from different  
391 climatic regions - A pyrolysis-GC/MS study, *Soil Biology and Biochemistry*, 41, 568–579,  
392 <https://doi.org/10.1016/j.soilbio.2008.12.023>, 2009.
- 393 Wagner, J., Martin, V., Speetjens, N. J., A'Campo, W., Durstewitz, L., Lodi, R., Fritz, M., Tanski, G.,  
394 Vonk, J. E., Richter, A., Bartsch, A., Lantuit, H., and Hugelius, G.: High resolution mapping shows  
395 differences in soil carbon and nitrogen stocks in areas of varying landscape history in Canadian  
396 lowland tundra, *Geoderma*, 438, 116652, <https://doi.org/10.1016/j.geoderma.2023.116652>, 2023.
- 397 Walker, D. A., Reynolds, M. K., Daniëls, F. J. A., Einarsson, E., Elvebakk, A., Gould, W. A., Katenin,  
398 A. E., Kholod, S. S., Markon, C. J., Melnikov, E. S., Moskalenko, N. G., Talbot, S. S., Yurtsev, B. A.  
399 (†), and Team, T. other members of the C.: The Circumpolar Arctic vegetation map, *Journal of*  
400 *Vegetation Science*, 16, 267–282, <https://doi.org/10.1111/j.1654-1103.2005.tb02365.x>, 2005.
- 401 Westerveld, L., Kurvits, T., Schoolmeester, T., Eckhoff, T., Overduin, P., Fritz, M., Alfthan, B.,  
402 Sinisalo, A., and Mulelid, O.: Arctic Permafrost Atlas, <https://doi.org/10.61523/KPJI4549>, 2023.
- 403 White, Bruns, T., Lee, S., and Taylor, J.: White, T. J., T. D. Bruns, S. B. Lee, and J. W. Taylor.  
404 Amplification and direct sequencing of fungal ribosomal RNA Genes for phylogenetics, 315–322,  
405 1990.
- 406 Xu, S., Li, Z., Tang, W., Dai, Z., Zhou, L., Feng, T., Chen, M., Liu, S., Fu, X., Wu, T., Hu, E., and Yu,  
407 G.: MicrobiotaProcess: A comprehensive R package for managing and analyzing microbiome and  
408 other ecological data within the tidy framework, , <https://doi.org/10.21203/rs.3.rs-1284357/v1>, 2022.
